# Supplementary material for: Interplay between epigallocatechin-3-gallate and ionic strength during amyloid aggregation
Source: PeerJ. 2021 Oct 22;9:e12381. doi: 10.7717/peerj.12381 (PMC8544251; doi:10.7717/peerj.12381)
Supplement: Supplemental Information 2 [file peerj-09-12381-s002.xlsx]

## Sheet: ThT EGCG binding
100 mM NaCl	EGCG-ThT	Wavelength nm.	0-0	0-0	0-0	25-0	25-0	25-0	50-0	50-0	50-0	0-25	0-25	0-25	25-25	25-25	25-25	50-25	50-25	50-25	0-50	0-50	0-50	25-50	25-50	25-50	50-50	50-50	50-50		50 EGCG	50 EGCG	50 EGCG		50 ThT	50 ThT	50 ThT		50EGCG50ThT	50EGCG50ThT	50EGCG50ThT			800 mM NaCl	EGCG-ThT	0-0	0-0	0-0	25-0
		240	0.112854	0.108765	0.126205	0.303528	0.278137	0.272705	0.463959	0.44339	0.400833	0.376068	0.387894	0.366409	0.510544	0.495621	0.492279	0.632935	0.766006	0.704788	0.593903	0.620773	0.658127	0.820969	0.799667	0.875565	0.856384	0.885544	0.912186		2.47746	1.39609	1.44969		0.62204	0.728317	0.671127		2.70178	2.73233	2.49696					0.056076	0.039383	0.066147	0.337418
		241	0.132614	0.11441	0.104523	0.277145	0.285385	0.27179	0.461014	0.447876	0.431931	0.390884	0.38295	0.358231	0.534698	0.507889	0.506027	0.7267	0.662033	0.660843	0.656357	0.686432	0.671021	0.818634	0.803497	0.774094	0.926117	0.987106	0.899597		1.47926	1.20615	1.20769		0.671555	0.701187	0.650223		1.88294	1.45114	2.24645					0.052338	0.043259	0.040497	0.344986
		242	0.12323	0.109482	0.103317	0.28511	0.274643	0.26651	0.464508	0.45755	0.444458	0.397232	0.380173	0.374008	0.532898	0.521576	0.518417	0.685135	0.668259	0.666901	0.676941	0.681015	0.682007	0.814896	0.821548	0.801636	0.937378	0.963501	0.959274		1.21551	1.30199	1.21256		0.661667	0.677322	0.665405		1.63156	1.83962	1.62089					0.057922	0.046906	0.041534	0.358765
		243	0.124374	0.116333	0.111877	0.290527	0.279419	0.270569	0.464554	0.456131	0.450607	0.397552	0.382629	0.380386	0.540298	0.533066	0.529251	0.696747	0.675186	0.684967	0.707077	0.696411	0.688828	0.839905	0.828751	0.820129	0.984833	0.977585	0.975143		1.23756	1.23685	1.21736		0.684952	0.682358	0.676315		1.6691	1.67749	1.68465					0.072647	0.062531	0.059158	0.372391
		244	0.13092	0.124268	0.119598	0.296921	0.287689	0.281967	0.471863	0.464203	0.460022	0.403656	0.393295	0.388977	0.552063	0.54274	0.543427	0.703949	0.692825	0.69223	0.715805	0.710678	0.705109	0.845047	0.846725	0.839447	0.997375	0.98764	0.990341		1.23584	1.24368	1.22974		0.694107	0.692123	0.6866		1.74908	1.68919	1.69955					0.085098	0.078201	0.073883	0.387146
		245	0.141388	0.134964	0.129608	0.305161	0.299164	0.294937	0.47998	0.472809	0.472137	0.414154	0.405762	0.400497	0.561951	0.552765	0.555389	0.715912	0.705383	0.709366	0.728226	0.72673	0.723389	0.863235	0.863037	0.858902	1.02182	1.01357	1.00795		1.24309	1.23726	1.23892		0.710602	0.705399	0.700394		1.74692	1.72005	1.71761					0.101929	0.0961	0.090714	0.404068
		246	0.147293	0.144318	0.138351	0.312607	0.306091	0.302887	0.486572	0.482529	0.481293	0.421463	0.415298	0.411499	0.571381	0.564789	0.566803	0.725983	0.718918	0.71962	0.742142	0.74028	0.736755	0.877975	0.876114	0.874115	1.03215	1.0251	1.02426		1.24348	1.237	1.23492		0.719925	0.715897	0.712097		1.73389	1.73091	1.7231					0.113083	0.107925	0.104141	0.415909
		247	0.153152	0.150497	0.146866	0.319244	0.313797	0.310974	0.494568	0.492157	0.490967	0.429947	0.4254	0.422821	0.581085	0.576126	0.577179	0.735764	0.73201	0.730927	0.755783	0.754288	0.752121	0.892487	0.889938	0.88887	1.04555	1.04105	1.03906		1.24107	1.23608	1.23262		0.730209	0.726456	0.723328		1.73811	1.72781	1.73026					0.121902	0.117752	0.115372	0.425064
		248	0.159561	0.156448	0.154602	0.326035	0.322037	0.319824	0.503265	0.501633	0.50058	0.438141	0.435226	0.433899	0.590836	0.587494	0.586533	0.747253	0.744339	0.742508	0.76944	0.768646	0.76683	0.907532	0.905396	0.903671	1.05977	1.05702	1.05432		1.24057	1.23795	1.23505		0.739258	0.736481	0.734329		1.74822	1.74206	1.73589					0.129898	0.126511	0.124847	0.433517
		249	0.166931	0.164413	0.162979	0.334808	0.331421	0.329361	0.51297	0.511932	0.51059	0.4478	0.446198	0.444962	0.601181	0.599564	0.597824	0.759399	0.75798	0.756592	0.783859	0.78363	0.781799	0.923233	0.920425	0.919174	1.07638	1.07419	1.07184		1.24252	1.23949	1.23752		0.750229	0.747894	0.746689		1.74991	1.74808	1.74521					0.138687	0.136139	0.134979	0.442642
		250	0.172867	0.171082	0.170059	0.342087	0.339462	0.338165	0.521927	0.520737	0.51973	0.456345	0.455231	0.454407	0.610947	0.609451	0.60791	0.770615	0.769455	0.76799	0.79744	0.797302	0.796143	0.936462	0.93425	0.934143	1.08974	1.08832	1.08786		1.24579	1.24376	1.24071		0.760376	0.758789	0.757553		1.76115	1.76184	1.75996					0.145401	0.143814	0.142853	0.451462
		251	0.17804	0.17601	0.175491	0.347992	0.346298	0.3452	0.529633	0.528839	0.528061	0.463684	0.462845	0.461853	0.61908	0.617859	0.61676	0.780212	0.779709	0.778412	0.808395	0.807877	0.807922	0.948425	0.947266	0.94577	1.10216	1.10196	1.10095		1.24983	1.24657	1.24481		0.767899	0.766815	0.766434		1.77295	1.76965	1.77158					0.150833	0.149597	0.148819	0.45813
		252	0.182999	0.181335	0.180878	0.353973	0.352783	0.35202	0.537415	0.536606	0.535919	0.470566	0.469818	0.469406	0.626938	0.625916	0.625305	0.789307	0.788864	0.788147	0.818542	0.817444	0.817902	0.959061	0.95842	0.957565	1.1138	1.11328	1.11235		1.25468	1.25333	1.25018		0.775024	0.774384	0.773788		1.78491	1.78284	1.7789					0.155899	0.155304	0.154694	0.464996
		253	0.187164	0.186111	0.185715	0.359406	0.358841	0.358047	0.544312	0.543518	0.543213	0.476013	0.475937	0.47554	0.633698	0.633011	0.632431	0.797333	0.796799	0.796188	0.826797	0.826401	0.826553	0.967392	0.96701	0.9673	1.12369	1.12314	1.12326		1.25916	1.2576	1.25575		0.780136	0.779999	0.779068		1.79317	1.78751	1.78406					0.16037	0.160019	0.159668	0.47113
		254	0.190964	0.190369	0.189957	0.363953	0.363602	0.362991	0.549789	0.54953	0.549133	0.480881	0.48056	0.480286	0.638824	0.638489	0.638153	0.803391	0.803009	0.802811	0.832443	0.832001	0.832138	0.97348	0.97348	0.973465	1.13165	1.13061	1.13071		1.26442	1.26207	1.26039		0.78299	0.782959	0.782364		1.79431	1.79474	1.79173					0.164154	0.163971	0.163666	0.4758
		255	0.194229	0.194	0.19339	0.367416	0.36731	0.366852	0.554047	0.553787	0.553665	0.484238	0.483749	0.483627	0.642593	0.642502	0.641891	0.807175	0.807602	0.80751	0.836197	0.835449	0.835617	0.977539	0.977264	0.977188	1.13565	1.13478	1.13478		1.26805	1.26691	1.26619		0.783936	0.784348	0.783951		1.7952	1.79684	1.79659					0.167328	0.167175	0.166916	0.479797
		256	0.196945	0.196793	0.196075	0.370224	0.370071	0.369995	0.557297	0.556961	0.556671	0.486343	0.485687	0.485733	0.644257	0.644241	0.644135	0.809601	0.809662	0.809448	0.837143	0.836975	0.836441	0.979187	0.978806	0.978775	1.1367	1.13686	1.13548		1.27124	1.27127	1.2704		0.782822	0.783417	0.782761		1.79916	1.79903	1.79759					0.169846	0.169678	0.169632	0.483017
		257	0.199005	0.198792	0.19838	0.372009	0.371994	0.371887	0.55899	0.558456	0.558609	0.485733	0.486206	0.486343	0.644211	0.644073	0.644073	0.809708	0.809723	0.809067	0.835403	0.835297	0.834824	0.976578	0.977356	0.976746	1.1348	1.13386	1.13388		1.27504	1.27411	1.27359		0.77916	0.779327	0.778305		1.79625	1.79169	1.79192					0.171463	0.171524	0.171616	0.485031
		258	0.200317	0.20015	0.200119	0.372925	0.372986	0.372513	0.559128	0.558899	0.559143	0.48381	0.484604	0.484543	0.642441	0.642441	0.641861	0.806854	0.80751	0.807098	0.830246	0.830109	0.829834	0.971268	0.97139	0.972	1.12836	1.12877	1.12767		1.27653	1.2748	1.27537		0.771667	0.771362	0.771881		1.78938	1.7856	1.78885					0.172363	0.172668	0.172333	0.485703
		259	0.200806	0.200592	0.200745	0.372528	0.372742	0.372498	0.558228	0.558502	0.55838	0.480179	0.480774	0.480652	0.637985	0.637863	0.637543	0.802353	0.802475	0.8022	0.820496	0.821045	0.820847	0.962006	0.962006	0.961563	1.11867	1.11867	1.11919		1.27751	1.27595	1.27602		0.760284	0.760269	0.760468		1.77686	1.77443	1.77692					0.172836	0.173019	0.172882	0.485275
		260	0.200668	0.200409	0.200668	0.371567	0.371353	0.371414	0.556381	0.556686	0.556747	0.474579	0.474823	0.474976	0.631317	0.631439	0.63118	0.795288	0.795303	0.79483	0.807816	0.808563	0.808334	0.949295	0.948868	0.948364	1.1049	1.10579	1.10457		1.27592	1.27533	1.27463		0.745575	0.745483	0.745941		1.76279	1.76448	1.7645					0.172729	0.172775	0.172745	0.484344
		261	0.199799	0.19957	0.199783	0.36972	0.36972	0.369644	0.553452	0.553635	0.553665	0.466797	0.466904	0.467255	0.622864	0.62294	0.623047	0.786423	0.786224	0.786072	0.792114	0.792053	0.792191	0.932327	0.931747	0.93132	1.08818	1.08838	1.08787		1.27544	1.27446	1.27341		0.727234	0.727386	0.727371		1.74739	1.74422	1.7422					0.171814	0.171753	0.171967	0.482285
		262	0.198196	0.197861	0.19809	0.366791	0.367081	0.366699	0.549515	0.549927	0.549896	0.456924	0.45697	0.457077	0.61232	0.612656	0.612381	0.775208	0.774994	0.774933	0.772308	0.772324	0.772141	0.912659	0.912094	0.912262	1.06775	1.06769	1.06802		1.27341	1.27174	1.26964		0.706161	0.705795	0.705811		1.72757	1.72314	1.72076					0.170212	0.170151	0.170441	0.479492
		263	0.195175	0.195328	0.195007	0.363007	0.362839	0.362946	0.544144	0.544342	0.544556	0.445206	0.445267	0.445496	0.599838	0.599838	0.599686	0.761414	0.761475	0.761566	0.749802	0.749573	0.749451	0.889526	0.889175	0.888885	1.04465	1.04402	1.04411		1.26724	1.26746	1.26587		0.682358	0.682129	0.682114		1.70081	1.69609	1.69742					0.167755	0.167908	0.167953	0.475632
		264	0.191528	0.19165	0.191345	0.357437	0.357773	0.357849	0.537582	0.53775	0.537918	0.432251	0.432251	0.432358	0.586166	0.585663	0.585938	0.746628	0.746613	0.746811	0.725143	0.725143	0.725052	0.864471	0.863998	0.863983	1.01897	1.01846	1.01897		1.26302	1.26306	1.2621		0.657791	0.657547	0.657379		1.67071	1.66992	1.66911					0.164459	0.164612	0.164612	0.470383
		265	0.186935	0.187103	0.186768	0.351181	0.35173	0.351685	0.529816	0.529907	0.530136	0.417816	0.417892	0.417908	0.570618	0.570435	0.570587	0.729965	0.72998	0.730286	0.6987	0.699295	0.698715	0.83757	0.837204	0.837402	0.990829	0.990555	0.991287		1.25589	1.25664	1.25584		0.631546	0.631958	0.631699		1.64232	1.6427	1.64044					0.160385	0.160645	0.160721	0.464188
		266	0.180984	0.181	0.18071	0.343567	0.344131	0.343613	0.520004	0.520172	0.520065	0.401657	0.401917	0.401825	0.553085	0.553391	0.553131	0.710907	0.711319	0.711548	0.669586	0.670227	0.669952	0.808319	0.807724	0.808121	0.960541	0.960144	0.960678		1.24838	1.24861	1.24722		0.604782	0.604996	0.604462		1.60849	1.6098	1.60829					0.155487	0.155502	0.155594	0.456406
		267	0.174454	0.174484	0.17421	0.335068	0.335434	0.335052	0.509308	0.50943	0.509476	0.385284	0.385544	0.385757	0.535538	0.535583	0.535599	0.691483	0.691666	0.692032	0.641434	0.642471	0.641983	0.778854	0.77919	0.778717	0.930099	0.929718	0.930099		1.23924	1.23714	1.23761		0.579041	0.578934	0.57843		1.57582	1.57645	1.57462					0.149582	0.149704	0.14975	0.44751
		268	0.166672	0.166763	0.166595	0.324966	0.325272	0.324707	0.496597	0.496475	0.496765	0.367722	0.36763	0.367874	0.515717	0.516052	0.51564	0.670197	0.670563	0.669861	0.611115	0.612106	0.61174	0.74736	0.746902	0.746658	0.896866	0.895905	0.896317		1.22704	1.22585	1.2238		0.551559	0.551224	0.551392		1.54605	1.54309	1.54195					0.142944	0.142944	0.143158	0.437515
		269	0.158615	0.15889	0.159027	0.314651	0.315033	0.314957	0.483414	0.483582	0.483765	0.350174	0.350555	0.350754	0.496628	0.49707	0.49646	0.648819	0.648636	0.64856	0.583054	0.583298	0.582794	0.71698	0.716537	0.716507	0.864594	0.863449	0.863571		1.21445	1.21361	1.21257		0.52652	0.52626	0.526779		1.51309	1.51132	1.51051					0.135971	0.136185	0.136032	0.426788
		270	0.150665	0.150848	0.151184	0.304108	0.304581	0.304367	0.470322	0.469971	0.470169	0.333633	0.333969	0.333832	0.477829	0.477814	0.477768	0.628052	0.627762	0.627258	0.556107	0.555984	0.555862	0.687653	0.688171	0.687408	0.833313	0.832336	0.832779		1.20027	1.19925	1.20067		0.503448	0.503601	0.503479		1.47737	1.47745	1.47635					0.129013	0.129181	0.129166	0.415726
		271	0.142471	0.142517	0.142883	0.293228	0.293442	0.293533	0.455734	0.455688	0.455582	0.31723	0.317108	0.317093	0.458481	0.459015	0.458878	0.606445	0.606064	0.605972	0.529633	0.529205	0.529053	0.659302	0.658905	0.659241	0.802032	0.802124	0.801636		1.18568	1.18388	1.18518		0.481613	0.481308	0.481094		1.44545	1.44603	1.44363					0.121964	0.122009	0.121979	0.403961
		272	0.134262	0.134415	0.134445	0.282013	0.282578	0.28241	0.44162	0.441254	0.441696	0.301453	0.301407	0.301666	0.440887	0.440826	0.440781	0.585938	0.585571	0.585846	0.504623	0.504517	0.504028	0.632507	0.632019	0.63237	0.772827	0.772812	0.77301		1.17113	1.17029	1.16809		0.461533	0.461441	0.461334		1.41597	1.41339	1.41219					0.114624	0.114975	0.114838	0.392273
		273	0.126221	0.125916	0.126343	0.271027	0.271271	0.271378	0.427261	0.427185	0.427673	0.28685	0.286758	0.287018	0.423386	0.423233	0.423615	0.565613	0.565582	0.565842	0.481689	0.481308	0.481277	0.607544	0.607483	0.607437	0.744904	0.745102	0.745087		1.15309	1.15326	1.15204		0.443527	0.443542	0.443741		1.38568	1.38522	1.38284					0.107559	0.107849	0.10788	0.380753
		274	0.118118	0.118073	0.11821	0.25975	0.260223	0.259872	0.41217	0.41217	0.413071	0.272461	0.272644	0.272995	0.406601	0.406662	0.40686	0.546021	0.546188	0.546371	0.4599	0.459702	0.459549	0.583099	0.583618	0.58374	0.718933	0.718704	0.719009		1.1367	1.13635	1.13632		0.427353	0.427597	0.427414		1.35539	1.35605	1.35446					0.10025	0.100571	0.100494	0.368835
		275	0.110367	0.110229	0.110321	0.248886	0.249176	0.249237	0.397797	0.398438	0.398972	0.259613	0.259842	0.259842	0.390701	0.391113	0.391098	0.527618	0.527298	0.527344	0.440262	0.440018	0.440109	0.561371	0.561584	0.561447	0.694717	0.694824	0.694565		1.1198	1.11987	1.11827		0.41333	0.413345	0.41301		1.32822	1.32832	1.32614					0.093369	0.093689	0.093552	0.356873
		276	0.103195	0.103043	0.103226	0.239029	0.239243	0.239243	0.384705	0.385849	0.385956	0.248123	0.248199	0.248398	0.376709	0.377121	0.376831	0.510208	0.510345	0.510574	0.423111	0.423187	0.42337	0.542404	0.542343	0.541733	0.672394	0.672501	0.672562		1.10327	1.10258	1.10211		0.401062	0.40123	0.400879		1.30458	1.30342	1.30135					0.086914	0.087036	0.087234	0.346237
		277	0.096359	0.096405	0.096436	0.229599	0.229782	0.229797	0.372131	0.373077	0.373184	0.237579	0.237732	0.237991	0.36377	0.363785	0.363892	0.494858	0.494797	0.494873	0.407913	0.407837	0.408081	0.524872	0.524384	0.524521	0.652618	0.652191	0.65213		1.08772	1.08562	1.08556		0.390747	0.390564	0.390274		1.28041	1.27939	1.27995					0.080917	0.081055	0.081284	0.335587
		278	0.090088	0.090042	0.090149	0.220688	0.220703	0.220764	0.360474	0.361053	0.361115	0.228226	0.228134	0.228104	0.351639	0.35173	0.351822	0.480392	0.48024	0.480072	0.394562	0.394226	0.394623	0.508759	0.508499	0.508636	0.633835	0.633698	0.633713		1.06976	1.06975	1.06947		0.38205	0.381836	0.381378		1.26067	1.25867	1.25638					0.075333	0.07579	0.075668	0.32576
		279	0.084061	0.084137	0.084106	0.212234	0.212112	0.212051	0.348862	0.349228	0.34935	0.219284	0.219223	0.219452	0.340378	0.340347	0.340256	0.466156	0.466248	0.466003	0.38237	0.38179	0.382278	0.494217	0.493484	0.493683	0.616348	0.616623	0.616562		1.0546	1.0526	1.05312		0.374008	0.374054	0.373932		1.23904	1.23811	1.23677					0.070206	0.070633	0.070328	0.315994
		280	0.078369	0.078491	0.078232	0.203812	0.204163	0.203979	0.337769	0.338196	0.338333	0.211166	0.211365	0.211182	0.329773	0.329788	0.329926	0.45285	0.452957	0.453201	0.37146	0.371262	0.371674	0.480972	0.480865	0.481094	0.600937	0.600815	0.601288		1.03775	1.03599	1.03587		0.367447	0.367508	0.367401		1.21965	1.21724	1.21657					0.06543	0.06575	0.065445	0.306961
		281	0.073456	0.073334	0.073364	0.196259	0.196396	0.196243	0.327316	0.327652	0.328033	0.204086	0.204437	0.204254	0.320572	0.320419	0.320572	0.441437	0.441177	0.441177	0.362045	0.361984	0.362244	0.469208	0.469116	0.469147	0.586884	0.586899	0.586914		1.02144	1.02023	1.01918		0.361847	0.362152	0.361984		1.19977	1.19871	1.19885					0.061172	0.06131	0.061249	0.298492
		282	0.069107	0.068527	0.068863	0.189484	0.189255	0.189453	0.317764	0.318008	0.318314	0.198059	0.19838	0.19783	0.311783	0.311722	0.312088	0.430389	0.430511	0.429977	0.353989	0.353836	0.354065	0.458755	0.458832	0.458984	0.573929	0.574402	0.573792		1.00525	1.00353	1.00388		0.357391	0.357819	0.35762		1.18338	1.18172	1.18185					0.057312	0.057358	0.05719	0.290085
		283	0.064407	0.063873	0.064056	0.182129	0.182205	0.182236	0.308105	0.308289	0.308151	0.191895	0.192291	0.192123	0.303482	0.303574	0.303787	0.419418	0.419708	0.419388	0.34613	0.346359	0.346359	0.448837	0.44902	0.449005	0.561493	0.5616	0.561966		0.98909	0.988373	0.987823		0.353607	0.353897	0.354187		1.16612	1.1651	1.16528					0.053223	0.053207	0.053497	0.281815
		284	0.059631	0.059494	0.059357	0.175171	0.175323	0.175293	0.298508	0.299011	0.298843	0.18605	0.187088	0.186432	0.295593	0.295837	0.29567	0.409088	0.408966	0.409241	0.339325	0.339447	0.33934	0.439545	0.440201	0.439987	0.55069	0.550461	0.550446		0.973297	0.973618	0.973236		0.350708	0.350876	0.351028		1.14989	1.15018	1.15083					0.049469	0.049332	0.049454	0.27417
		285	0.055084	0.054932	0.054993	0.168533	0.16861	0.168808	0.289474	0.289581	0.290176	0.180618	0.18158	0.181107	0.288116	0.288208	0.288147	0.39975	0.399506	0.399506	0.333328	0.333145	0.333038	0.431473	0.432144	0.431412	0.540237	0.540009	0.540161		0.95932	0.958847	0.958878		0.348526	0.348419	0.348663		1.1364	1.1358	1.13556					0.045822	0.045761	0.045517	0.266846
		286	0.050583	0.050171	0.050232	0.161957	0.162064	0.162109	0.280731	0.280777	0.28096	0.175613	0.176102	0.175964	0.280838	0.280899	0.281082	0.390167	0.390442	0.390518	0.32724	0.32695	0.327225	0.42337	0.423843	0.423508	0.529877	0.529785	0.529861		0.944366	0.944046	0.943329		0.346451	0.346237	0.346725		1.12207	1.12129	1.12065					0.041916	0.041962	0.041931	0.259399
		287	0.046249	0.045883	0.04599	0.155762	0.155899	0.156006	0.272354	0.272522	0.272736	0.170883	0.171204	0.171158	0.274246	0.273956	0.274185	0.381271	0.381546	0.38147	0.321762	0.321472	0.321442	0.416183	0.416565	0.415924	0.520462	0.52063	0.520493		0.931427	0.929276	0.929398		0.344604	0.344833	0.344589		1.10857	1.10713	1.10671					0.03833	0.038528	0.038513	0.252228
		288	0.042038	0.041855	0.042084	0.149704	0.149918	0.15033	0.264313	0.264526	0.264603	0.166412	0.166763	0.166641	0.267792	0.267868	0.2677	0.373199	0.373413	0.373245	0.316467	0.316681	0.316559	0.409439	0.409439	0.409576	0.511307	0.511978	0.511597		0.917267	0.91597	0.915802		0.343353	0.343323	0.343399		1.09625	1.09409	1.09302					0.035049	0.035385	0.035126	0.245316
		289	0.038269	0.03833	0.038437	0.144302	0.14447	0.144669	0.256516	0.256882	0.257034	0.162262	0.162354	0.162567	0.262085	0.261902	0.261963	0.365219	0.36525	0.365463	0.312057	0.312042	0.312195	0.402985	0.403229	0.403	0.503479	0.503433	0.503448		0.90361	0.902695	0.901962		0.341858	0.341812	0.341934		1.08406	1.08157	1.08214					0.032074	0.032166	0.03212	0.238815
		290	0.03511	0.035049	0.034988	0.139557	0.139435	0.139633	0.249664	0.249847	0.250427	0.158707	0.158829	0.159027	0.256714	0.256332	0.256592	0.358093	0.358276	0.358704	0.30835	0.307983	0.308197	0.397446	0.39743	0.397552	0.495895	0.495667	0.496307		0.889832	0.889191	0.88945		0.340759	0.340912	0.341125		1.07178	1.06981	1.06998					0.029373	0.029343	0.029678	0.233017
		291	0.032303	0.032028	0.031799	0.134842	0.13501	0.135086	0.243317	0.243469	0.24353	0.155624	0.155899	0.155716	0.251694	0.251572	0.251923	0.351395	0.351746	0.351776	0.30481	0.304611	0.304901	0.391876	0.391922	0.392242	0.488998	0.488998	0.489044		0.877426	0.876617	0.876541		0.339798	0.339859	0.340485		1.05904	1.05891	1.05839					0.02713	0.027267	0.027206	0.227509
		292	0.029602	0.029266	0.02919	0.130188	0.130356	0.130569	0.23671	0.236893	0.236923	0.152878	0.152771	0.152679	0.246902	0.246826	0.246918	0.345062	0.344864	0.345108	0.301407	0.301102	0.301361	0.386887	0.386871	0.387192	0.482025	0.482193	0.482208		0.864258	0.863831	0.864578		0.338943	0.339188	0.339508		1.04826	1.04646	1.04617					0.024704	0.024872	0.024933	0.222092
		293	0.026886	0.02681	0.026764	0.1259	0.125916	0.126404	0.23056	0.230545	0.230637	0.150024	0.149689	0.149765	0.242386	0.242065	0.242401	0.338547	0.338699	0.338837	0.298035	0.29776	0.297974	0.381836	0.381805	0.382004	0.474884	0.475037	0.475327		0.851395	0.850708	0.850494		0.338013	0.337997	0.338364		1.03615	1.03519	1.03455					0.02269	0.022781	0.022629	0.216843
		294	0.024582	0.024353	0.024338	0.121796	0.122223	0.121948	0.224564	0.224808	0.224777	0.146729	0.147079	0.14711	0.237839	0.237595	0.237793	0.331696	0.332382	0.33223	0.294998	0.294617	0.294601	0.376816	0.37706	0.37706	0.468475	0.468536	0.468658		0.83876	0.83847	0.837921		0.336578	0.336655	0.33699		1.02473	1.02321	1.02275					0.020752	0.020645	0.020615	0.211838
		295	0.022217	0.022095	0.022202	0.117905	0.118057	0.117783	0.21843	0.218643	0.218613	0.144058	0.144302	0.144531	0.233139	0.233002	0.233231	0.325623	0.325867	0.325729	0.291412	0.291245	0.29129	0.371582	0.371689	0.371979	0.461517	0.46138	0.461761		0.82634	0.825073	0.825836		0.334763	0.334885	0.335403		1.01152	1.01119	1.00952					0.018692	0.019135	0.018738	0.206345
		296	0.019684	0.019928	0.019958	0.113922	0.114105	0.113831	0.212524	0.212479	0.212708	0.141373	0.141708	0.141693	0.228439	0.228378	0.2285	0.319458	0.319519	0.319519	0.287766	0.287781	0.287689	0.366165	0.366669	0.366821	0.454437	0.454453	0.454483		0.813187	0.813049	0.812241		0.333038	0.332993	0.333588		0.999832	0.999374	0.998032					0.016708	0.017197	0.016647	0.201309
		297	0.017944	0.01799	0.018143	0.110413	0.110535	0.110397	0.207214	0.207214	0.20755	0.138885	0.139252	0.139191	0.22438	0.22435	0.224564	0.313858	0.313538	0.313599	0.284576	0.28447	0.284592	0.361465	0.361755	0.361801	0.447906	0.4478	0.447723		0.802185	0.800583	0.800476		0.331055	0.331726	0.331909		0.987396	0.986877	0.986237					0.015045	0.015488	0.015076	0.196426
		298	0.016113	0.01619	0.016266	0.106735	0.106934	0.107071	0.20195	0.201782	0.202118	0.136551	0.136795	0.136749	0.220367	0.22023	0.22023	0.308197	0.307693	0.307281	0.281235	0.281082	0.281372	0.356964	0.356842	0.356949	0.440964	0.440857	0.440964		0.789597	0.789276	0.788803		0.329102	0.32962	0.329483		0.974915	0.974945	0.974304					0.013443	0.013672	0.013458	0.191635
		299	0.014328	0.014511	0.014481	0.103394	0.103348	0.103729	0.196564	0.19664	0.196838	0.134109	0.134064	0.13443	0.21608	0.215836	0.215927	0.301758	0.301834	0.302032	0.277924	0.277771	0.277985	0.351761	0.351669	0.351944	0.434082	0.434067	0.434143		0.777359	0.776566	0.776337		0.327011	0.327133	0.327255		0.963181	0.961731	0.962067					0.011856	0.01178	0.01207	0.187225
		300	0.012894	0.012939	0.01268	0.099884	0.099945	0.100479	0.191132	0.191345	0.191681	0.131577	0.131607	0.131699	0.212006	0.211899	0.21228	0.295731	0.296249	0.296173	0.274734	0.274612	0.274475	0.346695	0.346756	0.346924	0.427399	0.427185	0.42749		0.76503	0.763809	0.76358		0.324738	0.324936	0.324905		0.949936	0.949387	0.950043					0.010376	0.010559	0.010498	0.182739
		301	0.01149	0.011673	0.011353	0.096832	0.096664	0.097137	0.186066	0.186142	0.186478	0.129715	0.129715	0.129608	0.208145	0.207962	0.208115	0.290298	0.29039	0.290451	0.271652	0.271362	0.271561	0.342209	0.342178	0.342346	0.421066	0.421066	0.421448		0.751877	0.750809	0.751312		0.322769	0.322906	0.322983		0.937317	0.937241	0.93689					0.009262	0.009537	0.009125	0.178375
		302	0.010452	0.010376	0.010193	0.093689	0.093719	0.09375	0.181274	0.181259	0.181534	0.127777	0.127731	0.127869	0.204605	0.204315	0.204147	0.284805	0.285156	0.285156	0.268845	0.268875	0.269196	0.337677	0.33783	0.338165	0.414719	0.41481	0.415131		0.7388	0.737915	0.738251		0.320663	0.320587	0.320953		0.924423	0.924606	0.924011					0.008286	0.008469	0.00827	0.174194
		303	0.00946	0.009293	0.009125	0.090683	0.090775	0.091248	0.176376	0.176559	0.176666	0.125992	0.126022	0.126251	0.200821	0.201111	0.20105	0.279282	0.279602	0.279861	0.266266	0.266449	0.266647	0.333206	0.333191	0.33374	0.408401	0.408661	0.408783		0.72551	0.725082	0.724838		0.318298	0.318466	0.318954		0.911621	0.911423	0.911423					0.00737	0.007385	0.007462	0.170273
		304	0.008469	0.008484	0.008331	0.088043	0.088058	0.088409	0.171555	0.171616	0.171829	0.12471	0.124619	0.124863	0.19725	0.197678	0.197632	0.274292	0.274292	0.274338	0.264053	0.264114	0.264084	0.329407	0.329147	0.329361	0.402634	0.402649	0.402893		0.712433	0.711716	0.711212		0.31636	0.316605	0.316925		0.898926	0.898636	0.898392					0.006638	0.006561	0.006531	0.165924
		305	0.007294	0.007401	0.007324	0.085449	0.08551	0.085144	0.166733	0.16684	0.166977	0.123154	0.123062	0.123077	0.194229	0.193954	0.19426	0.269318	0.26918	0.268906	0.261566	0.261658	0.261719	0.325058	0.324936	0.325409	0.396683	0.396652	0.396484		0.698929	0.69809	0.698074		0.313934	0.314484	0.314606		0.885864	0.885437	0.885208					0.005356	0.005737	0.005692	0.161652
		306	0.007126	0.006912	0.007034	0.082932	0.083069	0.083099	0.162628	0.162766	0.162704	0.121689	0.121613	0.12178	0.191208	0.191391	0.191208	0.264206	0.264191	0.264236	0.259415	0.25943	0.259415	0.321167	0.321182	0.321716	0.390503	0.39093	0.390839		0.686005	0.685318	0.684906		0.311676	0.31192	0.312027		0.871948	0.87236	0.872726					0.005203	0.005386	0.005234	0.157913
		307	0.006531	0.006317	0.006378	0.08017	0.080338	0.080582	0.158112	0.158157	0.158066	0.120346	0.120255	0.120163	0.187866	0.187881	0.18782	0.258453	0.258896	0.259109	0.257095	0.256424	0.256882	0.316833	0.316864	0.316971	0.384293	0.384583	0.384323		0.672043	0.671402	0.67128		0.308563	0.309418	0.309402		0.858673	0.858307	0.858887					0.004547	0.004837	0.004761	0.154068
		308	0.005936	0.005707	0.005737	0.07814	0.078033	0.07811	0.153778	0.153931	0.153976	0.118484	0.118378	0.118546	0.184372	0.184341	0.184128	0.253189	0.253357	0.253754	0.253952	0.253693	0.253967	0.312103	0.312103	0.312164	0.377487	0.378067	0.377945		0.658707	0.657471	0.657211		0.305542	0.306	0.306381		0.844864	0.845139	0.84317					0.004059	0.004227	0.004227	0.150009
		309	0.005463	0.005264	0.005142	0.075485	0.075485	0.07576	0.149948	0.149582	0.149582	0.116226	0.11673	0.116608	0.180756	0.180573	0.180603	0.248093	0.248184	0.248245	0.250763	0.250427	0.250549	0.306854	0.306808	0.307297	0.37085	0.370804	0.371292		0.644272	0.643829	0.644135		0.301758	0.302017	0.302551		0.829834	0.829865	0.828491					0.003586	0.003891	0.003601	0.146301
		310	0.005127	0.004837	0.00473	0.073441	0.073456	0.073746	0.145569	0.14534	0.145645	0.115021	0.115158	0.115219	0.177353	0.177444	0.177109	0.242966	0.242859	0.242981	0.246567	0.246735	0.246704	0.301697	0.30162	0.301865	0.363983	0.363953	0.364075		0.631119	0.630386	0.630432		0.297897	0.298386	0.298416		0.814941	0.814865	0.814194					0.003235	0.003571	0.003296	0.14299
		311	0.004883	0.0047	0.004684	0.071381	0.07164	0.071533	0.141525	0.141617	0.141846	0.113007	0.112946	0.11322	0.173401	0.173584	0.173767	0.23735	0.237457	0.237686	0.242569	0.24292	0.243256	0.296173	0.296082	0.296341	0.356674	0.356995	0.357285		0.617828	0.618378	0.617569		0.292892	0.293472	0.293671		0.79866	0.798782	0.798843					0.003143	0.003235	0.003189	0.139542
		312	0.004639	0.00444	0.004593	0.069458	0.069687	0.069534	0.137741	0.137802	0.138214	0.110703	0.111221	0.111328	0.169937	0.170242	0.169876	0.232147	0.232224	0.232117	0.23851	0.238831	0.238907	0.29071	0.290604	0.290375	0.349091	0.34938	0.349487		0.60495	0.605026	0.604721		0.287659	0.288452	0.288513		0.783737	0.784195	0.782898					0.003082	0.003067	0.003174	0.136322
		313	0.004623	0.00444	0.004532	0.06752	0.068008	0.06781	0.134216	0.134216	0.134277	0.10881	0.10907	0.109238	0.166489	0.166275	0.166428	0.226791	0.227005	0.227142	0.234161	0.234482	0.234558	0.285065	0.284988	0.284897	0.341858	0.341949	0.34256		0.592865	0.591812	0.592377		0.28244	0.283234	0.283615		0.768753	0.769211	0.768738					0.002945	0.002853	0.002884	0.132797
		314	0.00441	0.004135	0.004272	0.065933	0.066116	0.066376	0.130737	0.130829	0.131027	0.10704	0.106995	0.106979	0.162735	0.162933	0.162766	0.221985	0.222092	0.221939	0.229889	0.230087	0.230087	0.279022	0.279343	0.279404	0.334976	0.33493	0.334991		0.581802	0.581009	0.580704		0.277573	0.278122	0.278076		0.7547	0.753708	0.753677					0.002869	0.003067	0.002792	0.130203
		315	0.004379	0.003876	0.00383	0.064224	0.064301	0.064102	0.127197	0.127609	0.127609	0.104767	0.104645	0.104553	0.159042	0.159393	0.159103	0.216644	0.216843	0.216599	0.225082	0.225143	0.225479	0.273315	0.273163	0.273224	0.327713	0.327957	0.327652		0.570419	0.569443	0.569061		0.271988	0.272507	0.272736		0.740189	0.740433	0.740051					0.00264	0.002518	0.002579	0.126938
		316	0.004211	0.004303	0.003738	0.062698	0.063126	0.063065	0.124573	0.124893	0.124786	0.102829	0.103043	0.10318	0.155975	0.155899	0.155914	0.212082	0.21225	0.212509	0.220596	0.220901	0.221024	0.267731	0.267639	0.267761	0.320724	0.320953	0.320389		0.559525	0.558685	0.558456		0.266846	0.267242	0.267563		0.725433	0.725876	0.725754					0.002747	0.002777	0.00267	0.12413
		317	0.003983	0.003876	0.003754	0.061447	0.061508	0.0616	0.12175	0.121857	0.121811	0.100479	0.100433	0.101028	0.152374	0.152451	0.152435	0.207382	0.207626	0.207703	0.215561	0.216385	0.216141	0.261765	0.261703	0.262085	0.313828	0.313644	0.313431		0.54895	0.548157	0.54837		0.2612	0.26152	0.261856		0.711456	0.711609	0.711884					0.00238	0.002655	0.002625	0.121552
		318	0.003754	0.003265	0.003479	0.059555	0.059891	0.059631	0.118744	0.118866	0.11882	0.097931	0.097916	0.098633	0.148911	0.148773	0.148849	0.202576	0.202744	0.202698	0.210464	0.210861	0.210648	0.255234	0.255463	0.255829	0.306061	0.306351	0.306381		0.538681	0.538391	0.538605		0.255234	0.255447	0.255325		0.697479	0.69696	0.697052					0.002014	0.002594	0.002289	0.119202
		319	0.003799	0.003403	0.003326	0.058273	0.058197	0.058334	0.116333	0.116608	0.116318	0.095459	0.095596	0.095779	0.145065	0.14502	0.145187	0.198013	0.197662	0.19783	0.204605	0.205154	0.204712	0.248657	0.249161	0.248871	0.298584	0.298889	0.298752		0.529114	0.528625	0.528793		0.248062	0.248688	0.248688		0.682404	0.683456	0.682175					0.00209	0.002518	0.002151	0.116882
		320	0.003784	0.003647	0.003265	0.057404	0.057388	0.057434	0.114014	0.113953	0.113968	0.093307	0.092941	0.093307	0.141678	0.141647	0.141464	0.193115	0.193085	0.193039	0.19931	0.199173	0.199005	0.24202	0.242462	0.242203	0.291016	0.290924	0.291016		0.52037	0.519974	0.519882		0.241028	0.241638	0.241638		0.668732	0.669128	0.668289					0.002106	0.002457	0.002289	0.114929
		321	0.003418	0.003418	0.003235	0.055954	0.056076	0.056107	0.111481	0.111191	0.111481	0.089493	0.089661	0.0896	0.137421	0.13736	0.137085	0.187546	0.187897	0.187897	0.19223	0.192337	0.192444	0.234436	0.234436	0.234558	0.281815	0.282455	0.282608		0.511932	0.511627	0.511322		0.232971	0.233292	0.233536		0.654678	0.653442	0.653168					0.001862	0.001892	0.001984	0.112183
		322	0.002991	0.002838	0.002609	0.05452	0.054459	0.054764	0.109085	0.109146	0.1091	0.085709	0.08609	0.085999	0.133087	0.132828	0.132492	0.182358	0.182312	0.182327	0.184143	0.184586	0.184769	0.226181	0.226425	0.226196	0.273056	0.273163	0.272919		0.503311	0.503235	0.502441		0.223831	0.223953	0.224228		0.638931	0.639084	0.637878					0.001495	0.001312	0.001648	0.109772
		323	0.002945	0.003006	0.002884	0.053879	0.053864	0.053833	0.107147	0.107269	0.107162	0.082535	0.082428	0.082336	0.128983	0.128815	0.128448	0.177597	0.177216	0.177689	0.176971	0.176727	0.177048	0.217514	0.218033	0.217651	0.26416	0.264359	0.264114		0.496017	0.495865	0.495438		0.214996	0.215118	0.215042		0.624481	0.624237	0.623459					0.001465	0.001373	0.001465	0.108414
		324	0.00267	0.002731	0.002762	0.052536	0.052444	0.052612	0.104996	0.105087	0.105057	0.078995	0.079132	0.078568	0.124039	0.124023	0.124283	0.172363	0.172424	0.172531	0.16861	0.168564	0.168976	0.209076	0.209274	0.209473	0.254822	0.254974	0.255112		0.488556	0.488571	0.488098		0.205322	0.20578	0.205612		0.609573	0.609451	0.609283					0.001312	0.001389	0.001526	0.106659
		325	0.002655	0.002518	0.002548	0.05127	0.051529	0.051529	0.103241	0.103333	0.103622	0.074966	0.075363	0.075165	0.119766	0.119888	0.120056	0.16716	0.16745	0.167023	0.160599	0.160828	0.160873	0.200851	0.200943	0.200653	0.245911	0.245895	0.245911		0.482315	0.482117	0.481918		0.195816	0.196106	0.196304		0.594803	0.594666	0.594788					0.001114	0.00145	0.001144	0.104614
		326	0.002747	0.002396	0.002533	0.050949	0.050934	0.051117	0.101517	0.101578	0.101868	0.071777	0.072113	0.072098	0.116135	0.116196	0.116409	0.162811	0.163254	0.162857	0.153473	0.153595	0.1539	0.19342	0.193787	0.193085	0.238022	0.238083	0.237976		0.476547	0.47644	0.476166		0.187424	0.187485	0.187759		0.581696	0.582443	0.581772					0.001389	0.00145	0.001312	0.103394
		327	0.002411	0.002609	0.002197	0.05011	0.049942	0.050095	0.100128	0.100235	0.100418	0.068604	0.06897	0.069	0.112473	0.112701	0.11261	0.15892	0.158875	0.158798	0.146988	0.146851	0.147339	0.186508	0.186813	0.186447	0.230515	0.23056	0.230469		0.47113	0.470398	0.470139		0.179779	0.179749	0.179779		0.570175	0.570541	0.569565					0.000641	0.001129	0.001068	0.101913
		328	0.002167	0.002441	0.002426	0.049301	0.049393	0.049316	0.098389	0.098846	0.098633	0.066391	0.066483	0.066422	0.109589	0.109528	0.109741	0.154968	0.155029	0.155228	0.141525	0.14151	0.141708	0.180405	0.180481	0.180252	0.224289	0.224075	0.223785		0.464981	0.464722	0.464676		0.173477	0.173538	0.173553		0.559143	0.559235	0.558472					0.000992	0.001312	0.001129	0.100616
		329	0.002304	0.002365	0.002289	0.04834	0.048645	0.04837	0.097031	0.097366	0.097366	0.064575	0.064331	0.06424	0.107117	0.107056	0.106995	0.151901	0.152084	0.152191	0.137268	0.137009	0.137115	0.175568	0.175781	0.175293	0.218796	0.21846	0.218491		0.459824	0.459442	0.459427		0.167755	0.168594	0.168198		0.549683	0.549728	0.54921					0.000748	0.001434	0.00119	0.099274
		330	0.002228	0.002457	0.002228	0.048035	0.047714	0.047653	0.095963	0.095871	0.0961	0.06308	0.063141	0.062744	0.104935	0.10498	0.105087	0.14949	0.149475	0.149734	0.133865	0.134048	0.13382	0.171799	0.171921	0.171814	0.214722	0.214218	0.215042		0.454453	0.454666	0.454712		0.164291	0.164734	0.164459		0.541931	0.542191	0.541641					0.000793	0.000977	0.001129	0.097885
		331	0.002243	0.002045	0.002197	0.047409	0.047241	0.047363	0.094635	0.094666	0.094543	0.062042	0.062073	0.061905	0.103241	0.103317	0.103577	0.147171	0.147858	0.147461	0.131622	0.131958	0.131348	0.169479	0.169388	0.169388	0.211136	0.211441	0.211792		0.450714	0.449844	0.449951		0.162079	0.162125	0.162109		0.535873	0.535477	0.535599					0.000687	0.001144	0.001205	0.09671
		332	0.002319	0.002167	0.00206	0.046936	0.047043	0.0466	0.093582	0.093552	0.09346	0.061508	0.06131	0.061478	0.102371	0.102249	0.102737	0.145828	0.146072	0.145859	0.130188	0.130936	0.130768	0.167633	0.167953	0.167587	0.209366	0.209702	0.209625		0.445908	0.445511	0.445343		0.160614	0.161285	0.16095		0.530701	0.530228	0.529877					0.000793	0.000778	0.00116	0.095444
		333	0.002075	0.001907	0.00206	0.046005	0.046021	0.045929	0.092041	0.092331	0.092087	0.06105	0.061157	0.061111	0.10173	0.101776	0.101776	0.144638	0.144974	0.144943	0.130341	0.130508	0.130417	0.166931	0.167252	0.167145	0.208603	0.208176	0.208313		0.441299	0.44165	0.441315		0.160706	0.161194	0.160965		0.5271	0.526962	0.526077					0.000671	0.0009	0.000626	0.094467
		334	0.002075	0.002151	0.002258	0.045532	0.045639	0.045563	0.091293	0.091415	0.091385	0.0616	0.061829	0.061646	0.101791	0.101837	0.101715	0.144058	0.144333	0.144287	0.131424	0.131622	0.1315	0.167831	0.167801	0.167816	0.208725	0.208389	0.208282		0.437531	0.43779	0.437149		0.161957	0.162582	0.162292		0.524307	0.524185	0.523743					0.000961	0.001053	0.000748	0.093689
		335	0.001801	0.001801	0.001999	0.044754	0.045013	0.044846	0.089981	0.090073	0.08989	0.062469	0.062332	0.062393	0.102005	0.102142	0.101425	0.143494	0.143753	0.1436	0.133163	0.133179	0.133026	0.169022	0.169052	0.168945	0.208557	0.209	0.209045		0.433563	0.433441	0.433319		0.164032	0.164093	0.164337		0.523087	0.522781	0.522141					0.000687	0.000885	0.000549	0.092606
		336	0.001862	0.001953	0.001984	0.044556	0.044373	0.044617	0.089127	0.088898	0.088898	0.063675	0.063599	0.063522	0.102325	0.102737	0.102325	0.143753	0.143875	0.143921	0.13562	0.135666	0.135803	0.171127	0.171021	0.17131	0.210602	0.210266	0.21019		0.429977	0.429184	0.429047		0.167389	0.167374	0.16777		0.521729	0.522583	0.521317					0.000687	0.000763	0.000534	0.091568
		337	0.00206	0.001709	0.001343	0.043655	0.043839	0.043793	0.087906	0.088074	0.087708	0.064896	0.065201	0.064911	0.103012	0.103333	0.103088	0.144043	0.144119	0.144272	0.138641	0.138931	0.139114	0.173096	0.173553	0.173218	0.212631	0.212296	0.212173		0.425812	0.425079	0.425354		0.171295	0.171814	0.171219		0.521729	0.522247	0.521591					0.000366	0.000458	0.000671	0.090271
		338	0.002045	0.001907	0.002151	0.043594	0.043259	0.043686	0.087158	0.087372	0.087189	0.06694	0.067261	0.067047	0.104782	0.104919	0.104736	0.144684	0.145157	0.144928	0.143265	0.14299	0.14328	0.176941	0.176941	0.177094	0.21579	0.215668	0.21553		0.422333	0.421448	0.421417		0.176224	0.176514	0.176834		0.523438	0.523727	0.522919					0.000809	0.000671	0.001038	0.089722
		339	0.002228	0.002304	0.001877	0.043274	0.043182	0.043076	0.086334	0.086411	0.08667	0.069366	0.069321	0.069199	0.106506	0.106445	0.105957	0.146255	0.145935	0.146027	0.14769	0.147842	0.147781	0.181183	0.181152	0.180939	0.219345	0.218887	0.219345		0.418549	0.418533	0.418182		0.181931	0.18219	0.18222		0.525803	0.525024	0.52449					0.000778	0.000793	0.000992	0.088852
		340	0.005188	0.005157	0.004562	0.045593	0.045578	0.045654	0.087708	0.088318	0.087921	0.074173	0.074188	0.074234	0.110825	0.110962	0.110703	0.150299	0.150085	0.149994	0.155975	0.155899	0.155884	0.188217	0.188248	0.188217	0.226028	0.225967	0.225647		0.417328	0.417542	0.416992		0.190948	0.190994	0.191681		0.530609	0.529816	0.530426					0.003754	0.003693	0.003815	0.090714
		341	0.00296	0.003265	0.002869	0.043411	0.042953	0.043304	0.08519	0.085831	0.085358	0.075043	0.075058	0.074692	0.110703	0.111221	0.110565	0.149673	0.149933	0.149445	0.160126	0.160172	0.159821	0.191849	0.191742	0.192001	0.228607	0.229324	0.229126		0.411545	0.411407	0.410599		0.196167	0.196671	0.196823		0.530899	0.531326	0.531342					0.001678	0.001389	0.001892	0.088226
		342	0.002319	0.002213	0.00206	0.042114	0.04187	0.041885	0.084106	0.083328	0.083481	0.077148	0.076645	0.07692	0.112549	0.112579	0.112259	0.151016	0.150986	0.150696	0.165833	0.165436	0.165436	0.196579	0.196899	0.197037	0.233322	0.23288	0.23288		0.407166	0.40683	0.406784		0.2034	0.203995	0.203873		0.534531	0.533997	0.533798					0.001053	0.000977	0.000778	0.086182
		343	0.001968	0.001816	0.001694	0.04129	0.041489	0.041687	0.082367	0.082504	0.082413	0.080185	0.07959	0.079834	0.114761	0.114899	0.114365	0.152771	0.152573	0.152725	0.172333	0.172333	0.172409	0.202972	0.202332	0.202972	0.238571	0.238678	0.238678		0.404114	0.402649	0.401794		0.211227	0.212219	0.211349		0.539978	0.538773	0.538498					0.00061	0.00058	0.000687	0.085159
		344	0.002151	0.001694	0.00206	0.041534	0.041183	0.041229	0.081863	0.081451	0.081573	0.083557	0.083664	0.083832	0.117432	0.117462	0.117844	0.155304	0.155289	0.155136	0.180649	0.180206	0.180389	0.210159	0.210251	0.210205	0.245911	0.245499	0.245209		0.399689	0.399414	0.399307		0.221802	0.222107	0.221649		0.544815	0.545135	0.544449					0.000992	0.000763	0.000488	0.084564
		345	0.001846	0.001724	0.001602	0.040695	0.040649	0.040558	0.081497	0.080826	0.081039	0.087692	0.087265	0.087723	0.121033	0.120758	0.121063	0.157822	0.157547	0.157944	0.188965	0.189163	0.189148	0.21817	0.218262	0.217712	0.252548	0.252426	0.252701		0.396561	0.395615	0.395523		0.231705	0.232025	0.2323		0.551926	0.551743	0.55101					0.001007	0.000916	0.00058	0.083694
		346	0.001083	0.00119	0.001022	0.039688	0.039307	0.03949	0.079803	0.079498	0.079773	0.09082	0.090439	0.090698	0.123886	0.123886	0.12384	0.1604	0.160263	0.159897	0.19751	0.197266	0.19722	0.225998	0.224762	0.224976	0.259293	0.259888	0.259918		0.392563	0.392075	0.392349		0.241699	0.242432	0.24173		0.557953	0.557846	0.556778					0.000397	0.000275	0.000153	0.082565
		347	0.001236	0.001099	0.001282	0.039276	0.039078	0.039215	0.078934	0.078827	0.079132	0.095078	0.095245	0.095352	0.127747	0.127762	0.127563	0.163574	0.163391	0.163025	0.207062	0.206787	0.207031	0.234711	0.234421	0.234116	0.268127	0.268066	0.267715		0.388916	0.389496	0.388916		0.253494	0.254211	0.253098		0.56572	0.566315	0.565628					9.2e-05	0.000214	0.000183	0.081299
		348	0.001419	0.001297	0.001511	0.038605	0.038879	0.039291	0.078094	0.078354	0.078491	0.099777	0.099747	0.099945	0.131912	0.131912	0.131653	0.167145	0.167328	0.167236	0.217636	0.217133	0.217712	0.244202	0.244446	0.243668	0.277283	0.277298	0.276718		0.386475	0.386368	0.385544		0.266037	0.266464	0.265839		0.574127	0.573959	0.574539					0.00032	0.000443	0.000214	0.080566
		349	0.001541	0.001556	0.001358	0.038788	0.038986	0.038986	0.077682	0.077789	0.07756	0.104919	0.104645	0.104691	0.136353	0.136581	0.135712	0.171188	0.171066	0.170746	0.228271	0.228394	0.228363	0.254562	0.254715	0.254379	0.286896	0.286697	0.286652		0.382919	0.382767	0.382401		0.279099	0.279144	0.279343		0.583466	0.582916	0.582886					0.000748	0.000488	6.1e-05	0.080154
		350	0.001801	0.001663	0.001648	0.038605	0.038696	0.038498	0.077255	0.07634	0.07692	0.110138	0.109772	0.109634	0.140411	0.140778	0.140594	0.174957	0.174881	0.174759	0.239822	0.239578	0.240387	0.264862	0.265091	0.264908	0.296402	0.296249	0.296417		0.379227	0.379944	0.379349		0.292465	0.293137	0.292526		0.593338	0.592331	0.591858					0.000839	0.000534	0.00032	0.079773
		351	0.001801	0.001694	0.001663	0.038559	0.038528	0.038086	0.076614	0.076263	0.076385	0.115616	0.115433	0.115326	0.145401	0.145172	0.145477	0.179367	0.179459	0.178986	0.252411	0.252411	0.252594	0.276581	0.276657	0.276321	0.307068	0.307297	0.307617		0.376114	0.37619	0.376129		0.307343	0.308121	0.308044		0.603653	0.603378	0.603027					0.00087	0.000519	0.000534	0.078674
		352	0.001495	0.001541	0.001236	0.037628	0.037643	0.037277	0.075104	0.075195	0.075729	0.121323	0.120956	0.12085	0.150757	0.150558	0.150513	0.183594	0.183609	0.183243	0.265091	0.265076	0.264999	0.288498	0.288055	0.288406	0.318481	0.318344	0.318512		0.373093	0.372742	0.371887		0.3228	0.32338	0.323151		0.614227	0.614883	0.614395					0.000244	0.000122	0.000183	0.077576
		353	0.001083	0.001175	0.001495	0.036926	0.036972	0.036911	0.074097	0.0746	0.074539	0.127075	0.126831	0.127075	0.155823	0.156036	0.15567	0.188324	0.188492	0.188644	0.278519	0.278885	0.278427	0.300674	0.30127	0.300934	0.330093	0.329712	0.329834		0.369339	0.369003	0.36795		0.339355	0.33989	0.339264		0.626984	0.626389	0.62648					7.6e-05	-3.1e-05	-1.5e-05	0.076401
		354	0.000931	0.000946	0.001266	0.036636	0.036285	0.036621	0.073425	0.073517	0.07338	0.133224	0.13295	0.13327	0.16153	0.161606	0.161377	0.193481	0.193298	0.193344	0.292206	0.292892	0.292877	0.314102	0.314041	0.314117	0.342682	0.342682	0.342575		0.365601	0.365082	0.364822		0.355835	0.35701	0.35643		0.639587	0.638336	0.638199					1.5e-05	6.1e-05	-9.2e-05	0.075943
		355	0.000839	0.000854	0.001114	0.035675	0.035629	0.035812	0.072174	0.072601	0.072525	0.14006	0.140228	0.140244	0.167603	0.167175	0.167374	0.198883	0.198318	0.198242	0.307724	0.307983	0.307785	0.328964	0.328308	0.328094	0.356033	0.355896	0.355896		0.361954	0.361954	0.360962		0.373642	0.374863	0.374985		0.652603	0.652908	0.651825					-4.6e-05	-0.000122	-4.6e-05	0.075043
		356	0.000793	0.001022	0.000946	0.035446	0.03537	0.035416	0.071732	0.071701	0.071671	0.146942	0.147079	0.146942	0.173889	0.17366	0.174011	0.204361	0.204086	0.204025	0.323563	0.323212	0.324249	0.342865	0.342972	0.342941	0.369797	0.369873	0.369919		0.358368	0.357956	0.357925		0.393127	0.393661	0.39357		0.666443	0.667374	0.667343					-0.000534	-6.1e-05	4.6e-05	0.074158
		357	0.001205	0.0009	0.001144	0.035294	0.035416	0.03508	0.071289	0.070816	0.070831	0.154831	0.15477	0.154617	0.180832	0.180313	0.180328	0.210297	0.210388	0.210373	0.340027	0.338974	0.340042	0.358154	0.358185	0.358414	0.38443	0.384293	0.383835		0.355011	0.354401	0.354614		0.412125	0.413177	0.412949		0.682693	0.681152	0.680161					-0.000259	4.6e-05	0.000107	0.073532
		358	0.001633	0.000778	0.001419	0.035065	0.034821	0.035065	0.070389	0.070053	0.070175	0.162537	0.162674	0.162064	0.187469	0.186951	0.187439	0.216919	0.216736	0.216751	0.357376	0.356918	0.358109	0.374146	0.374908	0.374695	0.399429	0.40007	0.39946		0.351395	0.351166	0.350922		0.433075	0.433609	0.433578		0.697388	0.697357	0.697525					-0.00029	6.1e-05	0.000381	0.073181
		359	0.001434	0.001282	0.00119	0.034515	0.034515	0.034729	0.069336	0.069199	0.069412	0.170959	0.170883	0.170654	0.194809	0.194504	0.194595	0.223328	0.223221	0.223175	0.375488	0.375504	0.37645	0.391937	0.391739	0.391617	0.415268	0.415833	0.4151		0.347519	0.347488	0.346939		0.45517	0.455505	0.455917		0.713821	0.714111	0.713211					0	0	0.000168	0.072083
		360	0.001495	0.001465	0.001297	0.034546	0.034637	0.034088	0.068588	0.06842	0.068604	0.179367	0.179321	0.179062	0.202484	0.202515	0.202469	0.230331	0.230484	0.230164	0.39447	0.394882	0.395508	0.409744	0.409592	0.409866	0.432938	0.433212	0.433319		0.344543	0.344177	0.343597		0.477692	0.478088	0.478378		0.731171	0.73085	0.731323					0.000351	0.000244	0.000183	0.071213
		361	0.001358	0.001541	0.001358	0.034241	0.034317	0.033768	0.067551	0.067917	0.067841	0.188461	0.188293	0.18811	0.210556	0.21019	0.210709	0.237778	0.237625	0.237427	0.414627	0.414246	0.414597	0.428329	0.428192	0.427582	0.450226	0.45018	0.450623		0.340759	0.340332	0.340027		0.501007	0.502289	0.502335		0.750168	0.750198	0.749496					0.000366	0.000458	0.000153	0.070435
		362	0.001389	0.001205	0.001053	0.033615	0.033234	0.033417	0.066833	0.066788	0.066971	0.197235	0.197662	0.197357	0.218872	0.21875	0.218719	0.245071	0.244766	0.2453	0.435242	0.434952	0.435318	0.447876	0.447037	0.448151	0.468552	0.46788	0.468292		0.336563	0.336823	0.336075		0.525848	0.526489	0.527328		0.770569	0.770264	0.768448					0.000641	0.000137	0.000198	0.069122
		363	0.001358	0.001511	0.001068	0.033371	0.033127	0.032913	0.065659	0.066086	0.066025	0.20697	0.207153	0.207077	0.227585	0.227631	0.227554	0.25325	0.252899	0.253143	0.455841	0.456238	0.456421	0.467453	0.467316	0.46756	0.48732	0.487259	0.487198		0.33287	0.333099	0.332321		0.551193	0.551346	0.551788		0.790512	0.7901	0.788849					0.000214	0.000397	-0.000122	0.068634
		364	0.000885	0.000992	0.0009	0.032516	0.032745	0.032257	0.064896	0.064896	0.064682	0.216431	0.216019	0.216537	0.235764	0.236237	0.236084	0.261124	0.260651	0.261108	0.477127	0.477432	0.477707	0.488297	0.487335	0.487366	0.506042	0.506485	0.506424		0.329132	0.328461	0.328674		0.577515	0.576813	0.576706		0.810059	0.809647	0.809647					-0.000168	6.1e-05	-0.000229	0.067535
		365	0.001114	0.001114	0.001205	0.032104	0.032196	0.03183	0.064072	0.064117	0.064392	0.226852	0.226379	0.226852	0.245575	0.24527	0.245041	0.269348	0.269165	0.269547	0.499985	0.499969	0.499649	0.508224	0.50856	0.508179	0.526352	0.526245	0.526306		0.325562	0.324799	0.324844		0.603455	0.6035	0.603363		0.831833	0.830994	0.831818					0.000122	4.6e-05	0.000244	0.066971
		366	0.001404	0.001236	0.001328	0.031693	0.031784	0.031616	0.063385	0.063278	0.063309	0.237717	0.2379	0.238129	0.255661	0.255585	0.255432	0.278687	0.279022	0.278946	0.525375	0.524963	0.524841	0.531509	0.53241	0.531494	0.548599	0.548157	0.548386		0.321548	0.32132	0.320541		0.632446	0.633392	0.633514		0.854233	0.855804	0.855225					0.000153	0.000214	0.00029	0.065979
		367	0.000961	0.001038	0.001297	0.031509	0.031357	0.031006	0.062424	0.062546	0.062546	0.248489	0.248825	0.248444	0.265564	0.265396	0.265335	0.287552	0.287796	0.287521	0.549728	0.549316	0.549438	0.554474	0.555069	0.554077	0.569901	0.569931	0.570038		0.318024	0.317856	0.316681		0.660965	0.661713	0.661774		0.878387	0.87796	0.878098					0.000183	0.000137	-0.000107	0.065018
		368	0.00116	0.000977	0.001144	0.030838	0.030853	0.030563	0.061188	0.061523	0.061798	0.260437	0.260025	0.260208	0.276047	0.275879	0.276123	0.297455	0.297272	0.297485	0.575943	0.574982	0.575714	0.578445	0.579132	0.578781	0.593063	0.592804	0.593307		0.313843	0.313766	0.31311		0.692627	0.692795	0.691727		0.904877	0.903442	0.902206					0.000168	4.6e-05	-0.000153	0.064285
		369	0.001251	0.001312	0.00116	0.030258	0.030487	0.030396	0.060684	0.060776	0.060806	0.272614	0.272034	0.272781	0.287125	0.28685	0.287354	0.308197	0.307816	0.307907	0.602737	0.60257	0.602768	0.604141	0.604965	0.604721	0.61824	0.617844	0.617966		0.310043	0.309418	0.309067		0.725616	0.725998	0.725952		0.930847	0.929138	0.929718					6.1e-05	6.1e-05	9.2e-05	0.063293
		370	0.00119	0.001419	0.001251	0.030029	0.029648	0.029755	0.059601	0.059769	0.059906	0.285339	0.284851	0.285324	0.298477	0.298325	0.298584	0.31897	0.318466	0.318695	0.630859	0.63147	0.630981	0.630844	0.631668	0.630905	0.642792	0.643463	0.642807		0.305801	0.305344	0.305267		0.758972	0.759995	0.758682		0.957916	0.95932	0.956177					0.000122	9.2e-05	-7.6e-05	0.062134
		371	0.001129	0.001495	0.001114	0.029434	0.029449	0.029388	0.058609	0.059021	0.058701	0.297897	0.298172	0.297729	0.310196	0.310059	0.309952	0.329544	0.329269	0.3293	0.659103	0.659882	0.658463	0.658905	0.658234	0.657837	0.667633	0.668579	0.668671		0.301682	0.30159	0.301483		0.792007	0.792679	0.792709		0.984146	0.98497	0.984146					1.5e-05	9.2e-05	0.000198	0.061401
		372	0.001129	0.000931	0.001007	0.028854	0.028641	0.028732	0.057419	0.057465	0.057449	0.310776	0.311005	0.311188	0.322296	0.322021	0.322006	0.339874	0.340332	0.339844	0.688705	0.688278	0.688446	0.685791	0.685181	0.685349	0.694427	0.69458	0.694809		0.297394	0.297531	0.296906		0.82692	0.827469	0.827164		1.01277	1.01395	1.01283					0	0.000244	0.000153	0.06041
		373	0.001083	0.00087	0.001007	0.028397	0.028183	0.027954	0.05603	0.056122	0.056427	0.324478	0.324371	0.324753	0.334167	0.334106	0.333847	0.351105	0.351181	0.351013	0.718872	0.718735	0.718048	0.714005	0.713287	0.713776	0.721237	0.720642	0.721542		0.292969	0.292892	0.292725		0.862839	0.863647	0.862793		1.04276	1.0424	1.04276					-0.000244	0	4.6e-05	0.059311
		374	0.001099	0.000824	0.000977	0.027603	0.027496	0.027359	0.054657	0.054932	0.05484	0.337906	0.337967	0.338089	0.34642	0.34613	0.345718	0.361877	0.362076	0.361938	0.749252	0.748001	0.748154	0.742203	0.741959	0.741501	0.747437	0.74765	0.747818		0.288864	0.288498	0.288528		0.898209	0.900146	0.897339		1.07254	1.07135	1.06957					-0.000244	-0.000107	-7.6e-05	0.058151
		375	0.000931	0.000732	0.001114	0.026871	0.026657	0.026581	0.053436	0.053467	0.053558	0.352615	0.352188	0.352402	0.359192	0.359009	0.359131	0.373871	0.374008	0.373962	0.780289	0.780655	0.780487	0.771973	0.771698	0.772324	0.775955	0.77652	0.775848		0.284683	0.284149	0.28418		0.936218	0.937943	0.936234		1.10246	1.10143	1.1021					-4.6e-05	-3.1e-05	-0.000168	0.056976
		376	0.000809	0.0009	0.000931	0.026138	0.026062	0.025955	0.051834	0.052078	0.052292	0.366959	0.367126	0.366821	0.372177	0.372192	0.372299	0.386124	0.385818	0.385666	0.813568	0.812057	0.813019	0.801483	0.801743	0.802597	0.804428	0.805344	0.804626		0.280106	0.279678	0.279617		0.97374	0.974564	0.973801		1.13484	1.13411	1.13419					-0.000351	-4.6e-05	-0.000107	0.05574
		377	0.000961	0.000885	0.001022	0.025345	0.025467	0.025314	0.050568	0.050812	0.050522	0.381485	0.381851	0.381531	0.385132	0.385117	0.385529	0.397858	0.398178	0.397705	0.845856	0.845032	0.845673	0.83287	0.832413	0.832947	0.833221	0.833603	0.834351		0.275436	0.275391	0.27504		1.01283	1.01239	1.01177		1.16591	1.16624	1.16605					-6.1e-05	-0.000137	-0.000244	0.054352
		378	0.0009	0.001068	0.001099	0.024841	0.02478	0.024536	0.049149	0.049286	0.049194	0.396805	0.397018	0.397095	0.399002	0.399048	0.39946	0.410217	0.410248	0.41011	0.880859	0.880188	0.880051	0.865219	0.864807	0.865463	0.864197	0.863068	0.864853		0.270645	0.270294	0.270203		1.05411	1.05466	1.05499		1.19896	1.19875	1.1999					-0.000107	-0.000397	-6.1e-05	0.053268
		379	0.001022	0.001007	0.001053	0.024002	0.023834	0.02388	0.047714	0.047684	0.04776	0.412323	0.412384	0.412964	0.413254	0.413239	0.413193	0.422867	0.423157	0.423065	0.914825	0.915146	0.915573	0.897659	0.897675	0.896988	0.895279	0.893829	0.89502		0.265839	0.265533	0.265594		1.09473	1.0945	1.09601		1.23318	1.23346	1.23344					-0.000137	-6.1e-05	-7.6e-05	0.051834
		380	0.000839	0.001007	0.000885	0.023071	0.022949	0.023041	0.046036	0.045853	0.04599	0.42836	0.428818	0.429123	0.427612	0.427658	0.427567	0.43602	0.436295	0.436066	0.951004	0.951828	0.951462	0.931458	0.931427	0.931213	0.927155	0.927368	0.926575		0.260864	0.26062	0.260437		1.1378	1.13835	1.13895		1.26871	1.26897	1.2674					-0.000412	1.5e-05	-0.000153	0.05072
		381	0.000809	0.000916	0.000748	0.022278	0.022446	0.022293	0.044388	0.04425	0.044479	0.44458	0.445175	0.445618	0.442093	0.442612	0.442337	0.44931	0.449173	0.4496	0.987244	0.987839	0.987549	0.96579	0.965958	0.965775	0.959152	0.959106	0.95961		0.255554	0.255661	0.255463		1.17905	1.18109	1.183		1.3042	1.3055	1.30383					-0.000153	-0.000137	-0.000305	0.049286
		382	0.000961	0.001083	0.000885	0.021683	0.021469	0.021729	0.042862	0.04303	0.042969	0.461655	0.461746	0.462021	0.45726	0.457703	0.457291	0.463013	0.462723	0.46312	1.02559	1.02473	1.0253	1.0007	1	1.00089	0.99176	0.991959	0.991852		0.251099	0.250839	0.250702		1.22452	1.22592	1.22546		1.34241	1.3409	1.33737					-6.1e-05	-9.2e-05	-0.000244	0.04805
		383	0.001038	0.000977	0.00087	0.020813	0.020859	0.020798	0.041458	0.041428	0.041428	0.478928	0.479233	0.479248	0.473114	0.473206	0.47319	0.477158	0.476868	0.477737	1.06337	1.06302	1.06363	1.0358	1.03709	1.03633	1.02554	1.02608	1.02611		0.246216	0.245773	0.245697		1.26926	1.27174	1.27239		1.3774	1.38037	1.37645					-7.6e-05	-0.000107	-0.000214	0.046692
		384	0.000854	0.0009	0.00087	0.019897	0.019974	0.02002	0.039749	0.039917	0.039917	0.49527	0.495209	0.495407	0.487778	0.488144	0.487717	0.490646	0.490417	0.491302	1.09918	1.0994	1.09998	1.07054	1.07074	1.07098	1.05815	1.05968	1.05865		0.241287	0.240875	0.240784		1.31384	1.31345	1.3145		1.41592	1.41225	1.41454					-0.000397	-0.000259	-0.000366	0.04541
		385	0.000763	0.000992	0.000931	0.019257	0.019226	0.019363	0.038498	0.038437	0.038483	0.512497	0.512741	0.512589	0.503113	0.50354	0.503159	0.505173	0.505142	0.505325	1.13794	1.13777	1.13872	1.10628	1.10803	1.10648	1.09154	1.09277	1.09373		0.236618	0.236252	0.236038		1.35774	1.35922	1.36099		1.45007	1.45184	1.45081					-0.000137	-0.000381	-0.000198	0.04425
		386	0.000931	0.00116	0.001083	0.018738	0.018707	0.018631	0.037155	0.037216	0.03717	0.530533	0.530777	0.53067	0.519211	0.519623	0.519623	0.519897	0.520233	0.520554	1.17786	1.17873	1.1792	1.14343	1.14412	1.14336	1.12756	1.12779	1.12797		0.231995	0.231735	0.231705		1.40543	1.40825	1.40692		1.49165	1.48953	1.49112					-0.000107	-0.000198	-0.000183	0.043091
		387	0.001053	0.001068	0.000961	0.018066	0.01799	0.018173	0.035889	0.03595	0.036011	0.547943	0.547867	0.547928	0.534729	0.53537	0.535568	0.53447	0.534561	0.534943	1.21579	1.21591	1.2188	1.18037	1.17882	1.18054	1.16251	1.16299	1.16237		0.227554	0.227112	0.227158		1.45218	1.45071	1.45438		1.53056	1.53035	1.52814					-0.000122	-4.6e-05	-0.000153	0.042053
		388	0.000641	0.000778	0.000748	0.017258	0.017151	0.017258	0.034348	0.034622	0.034515	0.565125	0.565399	0.565903	0.550644	0.551437	0.551498	0.549438	0.54953	0.549789	1.25333	1.25485	1.25539	1.21819	1.21767	1.21811	1.19826	1.19766	1.19823		0.222717	0.222656	0.22229		1.49583	1.49707	1.49924		1.56609	1.56697	1.57173					-0.000443	-0.000397	-0.000427	0.040634
		389	0.000549	0.000717	0.000626	0.016602	0.016556	0.016449	0.033112	0.03331	0.033112	0.584381	0.584229	0.584488	0.567841	0.568298	0.568924	0.56514	0.565048	0.56575	1.29746	1.29753	1.29746	1.25642	1.25668	1.25697	1.23557	1.2356	1.23618		0.218384	0.217987	0.217743		1.54915	1.54625	1.54807		1.61142	1.60788	1.61139					-0.000534	-0.000259	-0.000275	0.039444
		390	0.000824	0.000977	0.000854	0.016418	0.016342	0.016205	0.032394	0.032272	0.032211	0.602448	0.602859	0.602676	0.584473	0.584946	0.585281	0.580261	0.580719	0.580704	1.3369	1.33814	1.3387	1.29594	1.29616	1.29613	1.27292	1.27174	1.27194		0.214279	0.214066	0.21402		1.59364	1.5938	1.59454		1.64987	1.64992	1.653					-0.000183	0.000122	1.5e-05	0.038681
		391	0.000885	0.000885	0.001068	0.015884	0.015823	0.015762	0.031296	0.031342	0.031342	0.620361	0.620819	0.620911	0.601639	0.602097	0.602341	0.596252	0.596649	0.596527	1.37701	1.37967	1.37942	1.33182	1.33514	1.3351	1.30789	1.30907	1.30895		0.210251	0.210083	0.209686		1.63893	1.64233	1.64484		1.68994	1.69253	1.69136					-0.000153	0.000183	-0.000122	0.03775
		392	0.000885	0.000641	0.000809	0.015213	0.015305	0.015274	0.030228	0.030243	0.030441	0.638565	0.639297	0.639908	0.618851	0.619339	0.619629	0.612183	0.612076	0.612167	1.41812	1.41959	1.41925	1.37178	1.37236	1.37302	1.34552	1.34721	1.34752		0.206161	0.206009	0.205688		1.69185	1.68759	1.6927		1.73549	1.73331	1.73419					-0.000275	-0.000168	-0.000305	0.036621
		393	0.000931	0.000854	0.000763	0.014771	0.014786	0.014603	0.029007	0.029068	0.029358	0.657059	0.658127	0.658401	0.636276	0.636658	0.636841	0.628128	0.628326	0.628433	1.46223	1.46216	1.46286	1.41219	1.41208	1.41396	1.38492	1.38507	1.38377		0.202362	0.202042	0.201797		1.74117	1.7428	1.74063		1.7748	1.77586	1.77748					-0.00029	-0.000427	-0.000259	0.035736
		394	0.000931	0.000809	0.000717	0.014236	0.014267	0.014084	0.028152	0.028397	0.028381	0.676834	0.6772	0.677231	0.653763	0.654358	0.65451	0.644958	0.644852	0.645142	1.50656	1.50435	1.50589	1.45306	1.45392	1.45521	1.42439	1.42578	1.42464		0.198563	0.198135	0.198059		1.78879	1.78671	1.7878		1.82039	1.81822	1.81902					-0.000244	-0.000259	-0.000153	0.034851
		395	0.000793	0.00087	0.000732	0.01387	0.013809	0.013611	0.027359	0.027512	0.027344	0.695984	0.696228	0.696503	0.671234	0.671616	0.672211	0.661057	0.661255	0.661896	1.5484	1.54668	1.5484	1.49307	1.49567	1.49257	1.4621	1.46156	1.46524		0.194672	0.194366	0.194199		1.8351	1.84079	1.8373		1.86377	1.86194	1.86566					-0.000381	-0.000305	-0.000305	0.033875
		396	0.000854	0.000854	0.000778	0.013412	0.01355	0.013443	0.026596	0.026672	0.026627	0.715164	0.714645	0.715042	0.688644	0.688843	0.689453	0.677612	0.677811	0.678619	1.58981	1.59197	1.58685	1.53534	1.53427	1.53513	1.49937	1.5004	1.50078		0.191025	0.190918	0.19075		1.88771	1.8905	1.89099		1.90347	1.90482	1.91078					-0.000336	-0.000183	-0.000275	0.033127
		397	0.000793	0.000854	0.000809	0.013046	0.013092	0.012955	0.025818	0.025848	0.025894	0.733521	0.732956	0.73378	0.705734	0.705917	0.706436	0.693527	0.693665	0.694641	1.62944	1.63458	1.62936	1.57094	1.57503	1.57475	1.53628	1.5401	1.53761		0.187775	0.187408	0.187302		1.94008	1.94174	1.9433		1.94365	1.94852	1.94782					-0.000305	-0.000473	-0.000214	0.032608
		398	0.000839	0.000656	0.000778	0.012695	0.01268	0.012726	0.025177	0.025101	0.025192	0.751022	0.751114	0.75174	0.721848	0.722153	0.723038	0.708725	0.709702	0.709869	1.6714	1.67058	1.66959	1.60671	1.60994	1.61145	1.57021	1.57515	1.57371		0.184631	0.184158	0.184006		1.98584	1.98662	1.99423		1.98314	1.99103	1.98685					-0.000153	-0.000244	-0.000214	0.031982
		399	0.000854	0.000809	0.000916	0.012497	0.01236	0.01236	0.024521	0.02446	0.024521	0.768433	0.769104	0.769958	0.738495	0.739182	0.73941	0.724411	0.725296	0.725281	1.70927	1.71004	1.70987	1.6476	1.65076	1.64983	1.60996	1.61058	1.6106		0.181488	0.181137	0.180786		2.02516	2.03653	2.0419		2.02332	2.02599	2.03023					-0.000137	-0.000183	-0.000229	0.031128
		400	0.000748	0.00061	0.000854	0.012009	0.011978	0.011887	0.023697	0.023865	0.023712	0.785736	0.78627	0.787338	0.754715	0.755447	0.75563	0.739075	0.739731	0.740448	1.74652	1.74631	1.74936	1.68556	1.68541	1.6841	1.64474	1.64406	1.64432		0.178284	0.177872	0.177673		2.07378	2.07694	2.08067		2.06932	2.07237	2.06767					-0.000381	-0.000305	-0.000397	0.030319
		401	0.000702	0.000671	0.000687	0.011642	0.011597	0.011612	0.023117	0.023315	0.023117	0.802719	0.80336	0.803802	0.770416	0.771332	0.771317	0.754333	0.754639	0.755066	1.78662	1.78699	1.78725	1.72229	1.72037	1.71712	1.67786	1.67921	1.68018		0.175156	0.17511	0.174927		2.10939	2.11211	2.11722		2.1107	2.10541	2.10642					-0.000229	-0.000366	-0.000366	0.029694
		402	0.000717	0.00061	0.000565	0.011322	0.011246	0.011307	0.02243	0.022568	0.022552	0.819519	0.820114	0.820358	0.785721	0.787094	0.786865	0.769073	0.769226	0.769852	1.82199	1.82245	1.82696	1.76015	1.75474	1.75465	1.7113	1.71225	1.71326		0.172272	0.172165	0.171875		2.15639	2.15977	2.16733		2.14716	2.14369	2.15144					-0.000351	-0.000488	-0.000381	0.028931
		403	0.000778	0.000671	0.000656	0.011063	0.011124	0.011169	0.022171	0.022079	0.022095	0.834869	0.835495	0.83606	0.800919	0.801575	0.801575	0.78302	0.78334	0.78363	1.85895	1.85699	1.85825	1.79038	1.79018	1.79065	1.74469	1.74728	1.74558		0.169754	0.169556	0.169357		2.19672	2.20232	2.19736		2.17633	2.18162	2.18382					-0.00032	-0.000366	-0.00029	0.028473
		404	0.000748	0.000626	0.000595	0.010818	0.01088	0.010773	0.021683	0.021484	0.021545	0.850525	0.850891	0.852081	0.815247	0.815918	0.816269	0.796738	0.796844	0.797348	1.89079	1.89273	1.89241	1.82239	1.82182	1.82541	1.77512	1.77686	1.77698		0.167084	0.166718	0.166611		2.24605	2.23731	2.24001		2.22102	2.21674	2.21304					-0.000397	-0.000427	-0.000443	0.027969
		405	0.000732	0.000778	0.000702	0.01059	0.010513	0.010696	0.021103	0.021118	0.021011	0.865204	0.865631	0.866241	0.828506	0.828598	0.829437	0.809036	0.809662	0.810135	1.92543	1.92954	1.92453	1.85138	1.85622	1.85284	1.80248	1.80705	1.80507		0.164612	0.164261	0.164032		2.28163	2.28049	2.28268		2.25488	2.25305	2.24829					-0.000351	-0.000305	-0.000504	0.02742
		406	0.000702	0.000702	0.000793	0.010315	0.0103	0.010315	0.02066	0.020569	0.020493	0.878998	0.879456	0.88028	0.84169	0.841873	0.842743	0.820618	0.822098	0.822449	1.95859	1.95444	1.95548	1.88141	1.88197	1.88455	1.83067	1.83409	1.83536		0.16214	0.161774	0.161636		2.31615	2.31706	2.31314		2.28375	2.28322	2.28348					-0.000351	-0.000259	-0.00029	0.026794
		407	0.000793	0.000793	0.0009	0.010162	0.010223	0.010208	0.020279	0.020187	0.020203	0.891266	0.891495	0.892548	0.85318	0.853363	0.854019	0.83165	0.832733	0.833435	1.97613	1.9829	1.98549	1.90848	1.9097	1.9098	1.85765	1.86063	1.86407		0.159546	0.159592	0.159393		2.33418	2.34654	2.34247		2.31088	2.31862	2.31076					-0.000275	-0.000183	-0.000275	0.026382
		408	0.000824	0.000717	0.000778	0.009888	0.009888	0.010025	0.019577	0.019623	0.019653	0.903427	0.903793	0.904877	0.863968	0.864761	0.865143	0.842529	0.842834	0.843842	2.01396	2.00914	2.01025	1.93475	1.93898	1.93538	1.88481	1.88593	1.88712		0.157181	0.157104	0.157089		2.37247	2.38269	2.37439		2.33902	2.3454	2.33966					-0.000397	-0.000305	-0.000412	0.025711
		409	0.000732	0.000702	0.000671	0.009674	0.009598	0.009842	0.019257	0.019165	0.019211	0.914001	0.914917	0.915268	0.874023	0.874725	0.875381	0.852219	0.852524	0.853195	2.03958	2.03555	2.03384	1.95601	1.96007	1.95962	1.90437	1.90509	1.90718		0.154984	0.154816	0.154755		2.39772	2.39906	2.40251		2.36029	2.37218	2.37622					-0.000458	-0.000412	-0.000412	0.02536
		410	0.000702	0.000641	0.000763	0.00946	0.009277	0.009354	0.018768	0.018753	0.01889	0.924362	0.925079	0.92569	0.883438	0.884399	0.884903	0.860916	0.861099	0.861816	2.05283	2.05751	2.05379	1.98135	1.9798	1.98167	1.92448	1.92546	1.93014		0.152725	0.15271	0.152527		2.43071	2.42941	2.43782		2.37967	2.3813	2.38745					-0.000534	-0.000381	-0.000488	0.024902
		411	0.000763	0.000732	0.000824	0.009369	0.009186	0.009155	0.018356	0.018509	0.018433	0.93277	0.933746	0.934448	0.891464	0.892319	0.892929	0.868515	0.868607	0.869263	2.07559	2.07718	2.07985	1.99861	1.99699	2.00201	1.94379	1.94104	1.94432		0.150635	0.150589	0.150558		2.44191	2.44698	2.45743		2.42067	2.40254	2.40993					-0.000473	-0.000244	-0.000366	0.024551
		412	0.000717	0.000748	0.00058	0.009109	0.009079	0.009186	0.018005	0.018036	0.017975	0.940887	0.941833	0.941833	0.898926	0.899673	0.900299	0.875839	0.876068	0.875885	2.09789	2.09193	2.09699	2.01567	2.00847	2.0184	1.95575	1.96129	1.96111		0.148727	0.148468	0.148483		2.46912	2.48024	2.46773		2.43387	2.43875	2.43315					-0.000458	-0.000229	-0.000443	0.02417
		413	0.000717	0.000671	0.000488	0.008972	0.008926	0.008896	0.01767	0.017654	0.017593	0.947189	0.947784	0.948639	0.904892	0.905975	0.906067	0.880753	0.88147	0.881607	2.11099	2.10675	2.10908	2.02556	2.02547	2.0312	1.97087	1.96997	1.96982		0.146637	0.146408	0.146378		2.4771	2.49864	2.48442		2.44687	2.45613	2.44838					-0.000488	-0.00032	-0.000427	0.023453
		414	0.000763	0.000671	0.000565	0.00882	0.008713	0.00885	0.017258	0.017212	0.017288	0.952057	0.953506	0.953568	0.909393	0.910217	0.910568	0.88475	0.885788	0.885635	2.1174	2.11844	2.12267	2.03732	2.0372	2.04361	1.98459	1.9767	1.98184		0.144791	0.144577	0.144394		2.48451	2.51607	2.5042		2.44447	2.44775	2.44801					-0.000473	-0.000305	-0.000534	0.023148
		415	0.000824	0.000671	0.000626	0.00856	0.00856	0.008667	0.016968	0.016907	0.016937	0.956055	0.956726	0.957535	0.912964	0.91362	0.913742	0.88829	0.888947	0.888901	2.12509	2.12529	2.1299	2.045	2.0468	2.04553	1.98851	1.9893	1.99115		0.142914	0.142715	0.142639		2.5144	2.50879	2.5177		2.46355	2.45474	2.46103					-0.000427	-0.000366	-0.000397	0.022766
		416	0.001205	0.001221	0.001236	0.008957	0.009033	0.009018	0.017273	0.017151	0.017227	0.958145	0.959076	0.959732	0.915268	0.91571	0.915863	0.889954	0.890549	0.890747	2.12047	2.12717	2.1217	2.04314	2.04742	2.0405	1.98758	1.98782	1.98981		0.141678	0.141602	0.141403		2.49303	2.49709	2.49448		2.45006	2.43884	2.44623					0.000168	0.000198	0.000137	0.022995
		417	0.000916	0.000854	0.000916	0.008545	0.008591	0.008499	0.016647	0.016479	0.016556	0.958267	0.959488	0.959702	0.914963	0.915268	0.915833	0.88945	0.890045	0.890579	2.10803	2.11024	2.11322	2.03632	2.03729	2.03091	1.9819	1.98047	1.9854		0.139557	0.139374	0.139252		2.47183	2.4706	2.47443		2.42322	2.4305	2.4398					-9.2e-05	-0.000381	-0.000214	0.022308
		418	0.000748	0.000793	0.000671	0.008133	0.008179	0.008011	0.016113	0.016098	0.016129	0.957947	0.958878	0.959137	0.914108	0.914749	0.915375	0.888779	0.889359	0.890091	2.10791	2.11148	2.11221	2.03311	2.03465	2.0313	1.97995	1.97943	1.98213		0.137726	0.137436	0.137329		2.46246	2.46596	2.47031		2.42349	2.43492	2.42813					-0.000366	-0.000458	-0.000397	0.021698
		419	0.000854	0.000763	0.000641	0.008041	0.00795	0.007797	0.015793	0.015778	0.015808	0.956223	0.957123	0.957077	0.912384	0.912811	0.913376	0.886551	0.887589	0.887741	2.10289	2.10597	2.10731	2.02824	2.0305	2.02737	1.9756	1.97647	1.97998		0.136108	0.135757	0.135681		2.45712	2.46333	2.47514		2.42038	2.41859	2.41591					-0.00032	-0.000275	-0.00032	0.021408
		420	0.000916	0.00087	0.000687	0.008011	0.00795	0.007767	0.015564	0.015488	0.015656	0.952103	0.952988	0.953735	0.908936	0.909393	0.909607	0.883102	0.883774	0.884109	2.09862	2.09697	2.10036	2.02812	2.0248	2.02208	1.96959	1.96994	1.97351		0.134354	0.134079	0.134018		2.44667	2.45972	2.45302		2.40189	2.40935	2.41583					-0.000168	-0.00032	-0.00032	0.021194
		421	0.000748	0.000793	0.00058	0.007751	0.007736	0.007584	0.015244	0.015228	0.015259	0.947098	0.947937	0.948425	0.903793	0.904175	0.904953	0.87822	0.878662	0.87915	2.09251	2.09103	2.08925	2.01415	2.01804	2.01318	1.95798	1.959	1.95863		0.132507	0.132446	0.132431		2.43401	2.44775	2.45114		2.41173	2.3947	2.40132					-0.000473	-0.000458	-0.000458	0.020798
		422	0.000809	0.000717	0.000656	0.007706	0.007553	0.007523	0.014999	0.015045	0.014938	0.940842	0.94136	0.942139	0.897675	0.898056	0.898376	0.872314	0.872574	0.872986	2.07585	2.0826	2.07251	1.99985	2.00227	2.00113	1.94679	1.94594	1.94617		0.130951	0.131088	0.130981		2.42476	2.43265	2.43597		2.3831	2.38841	2.38854					-0.000381	-0.00029	-0.00032	0.020325
		423	0.000748	0.000763	0.000778	0.007614	0.007462	0.007431	0.014755	0.01474	0.01474	0.932861	0.933365	0.934158	0.890137	0.890549	0.891052	0.864365	0.865204	0.865448	2.06364	2.06007	2.05788	1.9841	1.98184	1.98532	1.93166	1.92776	1.93144		0.129547	0.129593	0.129501		2.40753	2.40512	2.41284		2.36708	2.3773	2.37086					-0.000381	-0.000305	-0.000458	0.020096
		424	0.000763	0.000809	0.000732	0.007477	0.007477	0.007401	0.014481	0.014526	0.014511	0.923508	0.924072	0.924301	0.880875	0.881638	0.881927	0.85582	0.856247	0.8564	2.03917	2.03734	2.03752	1.96342	1.96397	1.96402	1.91145	1.91043	1.91295		0.128296	0.128052	0.128159		2.37813	2.37929	2.39008		2.34512	2.34163	2.35098					-0.000336	-0.00032	-0.000412	0.019882
		425	0.000702	0.000626	0.000656	0.007141	0.007309	0.007141	0.014099	0.014297	0.014145	0.911926	0.91246	0.912766	0.869797	0.87027	0.870911	0.845154	0.845566	0.845963	2.01588	2.01547	2.01399	1.93854	1.93925	1.94	1.8867	1.88777	1.88763		0.126785	0.126465	0.126648		2.35544	2.36899	2.35968		2.32268	2.32129	2.32161					-0.000458	-0.000504	-0.000687	0.019455
		426	0.000519	0.00058	0.000519	0.007095	0.007034	0.007034	0.01384	0.014023	0.013916	0.899155	0.899704	0.899902	0.857697	0.857834	0.858398	0.833069	0.833328	0.834137	1.9893	1.98656	1.9863	1.91151	1.914	1.91528	1.86095	1.86293	1.86249		0.125229	0.125061	0.125153		2.32431	2.32635	2.33212		2.29338	2.2952	2.29416					-0.00061	-0.000595	-0.00061	0.019196
		427	0.000443	0.000519	0.000549	0.006912	0.006897	0.006897	0.013596	0.013748	0.013779	0.885056	0.885437	0.885818	0.844589	0.844604	0.845474	0.819992	0.820389	0.820923	1.96013	1.95796	1.9575	1.88493	1.88698	1.88551	1.83217	1.83423	1.83581		0.123932	0.123825	0.123825		2.29134	2.28654	2.2916		2.26628	2.25726	2.25896					-0.000534	-0.000473	-0.000488	0.018982
		428	0.000732	0.000687	0.000885	0.006943	0.007019	0.007034	0.01358	0.013702	0.013763	0.870148	0.870346	0.87059	0.830231	0.830276	0.831161	0.806335	0.806808	0.806885	1.92252	1.92618	1.92752	1.8533	1.85443	1.85478	1.80112	1.80382	1.80296		0.122787	0.122742	0.122864		2.25732	2.25731	2.26158		2.2305	2.23038	2.23003					-0.000366	-0.000244	-0.000305	0.018936
		429	0.000824	0.000748	0.000687	0.006897	0.006989	0.006897	0.013382	0.013519	0.013474	0.852554	0.853058	0.853149	0.813278	0.813446	0.814224	0.790375	0.790543	0.790558	1.88499	1.88753	1.88864	1.81708	1.81682	1.8165	1.76581	1.76768	1.7674		0.121445	0.121338	0.121323		2.21197	2.2159	2.21735		2.18446	2.18106	2.1864					-0.000336	-0.00032	-0.000259	0.018738
		430	0.000656	0.000717	0.000595	0.006805	0.006836	0.006607	0.013123	0.013275	0.013229	0.834	0.834824	0.834686	0.795914	0.796265	0.796951	0.773315	0.773285	0.773575	1.84593	1.84732	1.84676	1.77992	1.78038	1.77954	1.73082	1.72945	1.73224		0.120102	0.12001	0.119965		2.16856	2.17053	2.17014		2.14533	2.13747	2.1411					-0.000549	-0.000381	-0.000366	0.01828
		431	0.00061	0.00061	0.000565	0.006561	0.006592	0.006531	0.012909	0.012955	0.012924	0.814194	0.814789	0.815186	0.777252	0.777298	0.777771	0.754959	0.755203	0.755493	1.80353	1.8035	1.8053	1.73724	1.74005	1.73796	1.69099	1.68985	1.69264		0.118866	0.118698	0.118774		2.12032	2.12186	2.11618		2.09848	2.09656	2.10146					-0.000443	-0.000366	-0.000519	0.017944
		432	0.000763	0.000763	0.000748	0.006714	0.006638	0.006653	0.012848	0.012878	0.012863	0.793198	0.793991	0.794296	0.757965	0.75766	0.758224	0.735748	0.736313	0.73613	1.75822	1.758	1.76004	1.69296	1.696	1.6936	1.6472	1.648	1.64789		0.117767	0.117645	0.117569		2.06642	2.06706	2.067		2.052	2.05029	2.04927					-0.000259	-0.000412	-0.000519	0.01796
		433	0.000717	0.000717	0.00058	0.006454	0.006409	0.006454	0.01265	0.01265	0.012619	0.771759	0.772308	0.77269	0.737228	0.737045	0.737366	0.715912	0.716187	0.715851	1.71155	1.71124	1.71335	1.64906	1.64844	1.64861	1.60271	1.60405	1.60297		0.116516	0.116379	0.116241		2.01068	2.00899	2.01354		1.99944	1.99998	1.99937					-0.000366	-0.000412	-0.000504	0.017731
		434	0.000748	0.000732	0.00061	0.006348	0.006348	0.006271	0.012589	0.012527	0.012497	0.749146	0.749329	0.749054	0.715729	0.715271	0.715378	0.695068	0.695175	0.695068	1.66136	1.66017	1.66197	1.60112	1.60103	1.60135	1.55618	1.55714	1.55698		0.115341	0.115204	0.115158		1.9512	1.95142	1.9549		1.94467	1.94659	1.94644					-0.00032	-0.000381	-0.000458	0.017487
		435	0.000763	0.000763	0.000626	0.006271	0.006317	0.006195	0.012039	0.012344	0.012253	0.7258	0.725708	0.725494	0.693069	0.69281	0.69281	0.673416	0.673355	0.673416	1.60998	1.60962	1.61177	1.55071	1.55182	1.55064	1.50668	1.50822	1.50796		0.114136	0.114059	0.114029		1.89308	1.89171	1.89371		1.89256	1.89066	1.89177					-0.000336	-0.000412	-0.000443	0.017166
		436	0.000732	0.000778	0.000702	0.006393	0.00621	0.006165	0.011978	0.012238	0.012161	0.70105	0.700699	0.70079	0.669708	0.669128	0.669281	0.650772	0.650742	0.650803	1.55576	1.55486	1.55655	1.49876	1.49858	1.49889	1.45808	1.45773	1.45703		0.113052	0.112991	0.113083		1.82942	1.83017	1.8296		1.83461	1.83305	1.83295					-0.000366	-0.000305	-0.000397	0.017059
		437	0.000717	0.000717	0.000656	0.006149	0.006042	0.006088	0.011856	0.011902	0.011887	0.676254	0.676025	0.675995	0.646286	0.645645	0.645905	0.627975	0.628082	0.627838	1.5016	1.49995	1.49992	1.44617	1.44704	1.4467	1.40695	1.40683	1.40663		0.111969	0.111877	0.111908		1.76601	1.7668	1.76794		1.7757	1.77492	1.7749					-0.000488	-0.000458	-0.000412	0.01683
		438	0.000687	0.000626	0.000641	0.006027	0.005936	0.006027	0.01178	0.011871	0.01181	0.649979	0.649658	0.649475	0.621231	0.6203	0.620972	0.603897	0.603638	0.603699	1.4427	1.44145	1.44168	1.39038	1.39079	1.38998	1.35346	1.35301	1.35205		0.110855	0.110718	0.110779		1.69836	1.69913	1.70019		1.71201	1.7104	1.71074					-0.000427	-0.000458	-0.000443	0.016556
		439	0.000595	0.000702	0.000534	0.006027	0.005997	0.00592	0.011612	0.011597	0.011581	0.623901	0.623703	0.623306	0.596558	0.595993	0.595993	0.580093	0.579742	0.579666	1.38545	1.38429	1.38278	1.33511	1.33499	1.3345	1.30008	1.29933	1.29892		0.109894	0.109695	0.109695		1.63193	1.63234	1.63112		1.64998	1.64862	1.64861					-0.000473	-0.000488	-0.000458	0.016403
		440	0.000702	0.000732	0.000534	0.005936	0.006073	0.00589	0.011505	0.011505	0.011459	0.597351	0.597031	0.597092	0.571503	0.571152	0.570831	0.555679	0.555679	0.555084	1.32564	1.32567	1.32394	1.27884	1.27785	1.27754	1.24528	1.24445	1.24411		0.108856	0.108673	0.108749		1.56342	1.5629	1.56308		1.58553	1.58287	1.58401					-0.000473	-0.000381	-0.000427	0.01622
		441	0.00058	0.000778	0.000687	0.005829	0.00589	0.005737	0.011383	0.011337	0.011353	0.568878	0.568512	0.568298	0.544144	0.543777	0.543488	0.529388	0.529358	0.528915	1.26221	1.26117	1.261	1.21822	1.21672	1.21629	1.18611	1.18535	1.185		0.107849	0.107559	0.107635		1.48944	1.48788	1.48781		1.51613	1.5136	1.51437					-0.000381	-0.000336	-0.000458	0.01593
		442	0.000458	0.000641	0.000443	0.005508	0.005661	0.005646	0.011169	0.011063	0.011063	0.541046	0.540634	0.539963	0.517303	0.516876	0.516571	0.503799	0.503571	0.503098	1.20006	1.19897	1.19897	1.15811	1.15706	1.15668	1.12782	1.1275	1.12746		0.106659	0.106506	0.106415		1.41563	1.41466	1.41405		1.44885	1.44658	1.44554					-0.00061	-0.000534	-0.000595	0.015564
		443	0.000626	0.000793	0.000626	0.005707	0.005753	0.005737	0.011185	0.011108	0.011124	0.513626	0.512634	0.512161	0.490952	0.490433	0.490097	0.478409	0.478226	0.478027	1.13902	1.13763	1.138	1.0988	1.09821	1.09773	1.07074	1.07004	1.06966		0.105698	0.105682	0.105484		1.34258	1.34262	1.34172		1.3813	1.37997	1.37913					-0.000336	-0.000397	-0.000443	0.015656
		444	0.000656	0.000717	0.000763	0.005661	0.0056	0.0056	0.010986	0.01091	0.010925	0.484818	0.483597	0.483353	0.463715	0.462921	0.462769	0.452072	0.45166	0.45166	1.07587	1.07332	1.07411	1.03734	1.03703	1.03624	1.0114	1.01013	1.00954		0.104752	0.104553	0.104477		1.26703	1.26683	1.26562		1.31128	1.31038	1.30913					-0.000427	-0.000397	-0.000458	0.015381
		445	0.000687	0.000656	0.000595	0.005554	0.005524	0.005463	0.010696	0.010651	0.010681	0.456329	0.455383	0.45517	0.437103	0.436264	0.436203	0.426147	0.425629	0.425568	1.01273	1.0108	1.01105	0.97702	0.976883	0.976227	0.952988	0.95108	0.951172		0.103729	0.103516	0.103363		1.19338	1.19241	1.19136		1.24312	1.2411	1.2401					-0.000488	-0.000458	-0.000549	0.015106
		446	0.000595	0.000717	0.000534	0.005417	0.005447	0.005402	0.01059	0.010483	0.010513	0.428207	0.427353	0.427338	0.410507	0.409821	0.409393	0.400558	0.39978	0.399658	0.950165	0.948563	0.948181	0.917007	0.916489	0.915741	0.895493	0.89296	0.892456		0.102646	0.102448	0.102371		1.12036	1.11902	1.11762		1.17481	1.1723	1.17154					-0.000519	-0.000381	-0.000473	0.014954
		447	0.00058	0.000732	0.000671	0.005386	0.005417	0.005371	0.010574	0.010422	0.010468	0.400269	0.399551	0.399567	0.384094	0.383392	0.382889	0.375046	0.374451	0.374191	0.887939	0.886841	0.885818	0.857895	0.856903	0.855881	0.837524	0.835037	0.834564		0.101654	0.10144	0.101349		1.04762	1.04599	1.04485		1.1064	1.10445	1.10355					-0.000488	-0.000275	-0.000504	0.014832
		448	0.00061	0.000595	0.000549	0.005234	0.005157	0.005142	0.0103	0.010239	0.010239	0.373642	0.372986	0.372696	0.358856	0.358307	0.357712	0.350525	0.35022	0.349777	0.829285	0.828262	0.826889	0.801392	0.800262	0.799362	0.782379	0.780121	0.779449		0.100647	0.100433	0.100311		0.978333	0.976868	0.975662		1.04187	1.03964	1.03896					-0.000565	-0.00032	-0.000565	0.014664
		449	0.000565	0.000702	0.000458	0.005127	0.005066	0.005112	0.010101	0.010117	0.01001	0.349091	0.348465	0.348022	0.335419	0.3349	0.334274	0.327988	0.327637	0.327377	0.774857	0.773605	0.772354	0.748688	0.747772	0.746796	0.731125	0.729233	0.728516		0.09967	0.099533	0.09938		0.914093	0.912781	0.911469		0.981628	0.979645	0.978806					-0.000473	-0.000366	-0.000549	0.014389
		450	0.00061	0.000748	0.00058	0.005051	0.005203	0.005066	0.009949	0.009995	0.010025	0.324387	0.323761	0.323074	0.311874	0.311249	0.310638	0.305191	0.304855	0.304565	0.71962	0.718002	0.716904	0.695053	0.694611	0.69342	0.679321	0.678009	0.677048		0.098816	0.098495	0.098541		0.849335	0.847595	0.846375		0.920273	0.918716	0.917572					-0.000366	-0.000244	-0.000488	0.014267
		451	0.00061	0.000656	0.000641	0.005005	0.005157	0.005066	0.009842	0.009903	0.009964	0.299545	0.298859	0.298233	0.288177	0.287552	0.287094	0.282562	0.282028	0.281662	0.664551	0.662781	0.661667	0.641876	0.641479	0.640167	0.627548	0.62677	0.625916		0.097794	0.09758	0.097534		0.784348	0.782562	0.781403		0.858963	0.857224	0.85611					-0.000488	-0.000275	-0.000458	0.014175
		452	0.000687	0.000671	0.000641	0.004883	0.00499	0.005035	0.009705	0.009811	0.00975	0.27681	0.275909	0.275482	0.26651	0.265808	0.265457	0.261765	0.261169	0.260788	0.613754	0.612137	0.61087	0.59343	0.592819	0.591843	0.580566	0.57988	0.579269		0.096909	0.096725	0.096664		0.724915	0.723648	0.722107		0.802872	0.801117	0.800201					-0.000488	-0.000351	-0.000519	0.014023
		453	0.000626	0.000732	0.00061	0.004852	0.004852	0.004883	0.009537	0.009552	0.009491	0.254425	0.25351	0.252945	0.245438	0.244431	0.244278	0.241226	0.240585	0.240387	0.563522	0.561661	0.560684	0.545486	0.54483	0.543777	0.534454	0.533463	0.532761		0.095901	0.09581	0.095749		0.666412	0.664917	0.663483		0.747208	0.745529	0.744125					-0.000504	-0.000427	-0.000565	0.013763
		454	0.00061	0.000656	0.000656	0.004898	0.004929	0.004883	0.009521	0.00946	0.009415	0.232758	0.23172	0.231369	0.224823	0.223984	0.22377	0.221329	0.220718	0.220413	0.515167	0.513214	0.512329	0.499054	0.498352	0.497284	0.489761	0.488602	0.487885		0.095047	0.094849	0.094772		0.609756	0.608154	0.606934		0.693207	0.691437	0.690048					-0.000473	-0.000458	-0.000504	0.013657
		455	0.00058	0.000641	0.000565	0.004807	0.004761	0.0047	0.009384	0.009323	0.009232	0.212753	0.211761	0.21167	0.20575	0.205048	0.204834	0.202988	0.202469	0.201965	0.470657	0.468765	0.468048	0.456711	0.455627	0.454758	0.448334	0.447144	0.446579		0.093918	0.093903	0.093735		0.557617	0.556396	0.55481		0.643219	0.64151	0.64006					-0.000519	-0.000397	-0.000504	0.013474
		456	0.000595	0.000687	0.000687	0.004883	0.004868	0.004791	0.00943	0.009354	0.009247	0.193802	0.192856	0.192673	0.187622	0.186951	0.18663	0.185562	0.185165	0.184418	0.427917	0.426514	0.425705	0.41626	0.414917	0.413956	0.408707	0.407455	0.406876		0.093216	0.093109	0.092896		0.507935	0.506409	0.504776		0.595032	0.593277	0.592346					-0.000381	-0.00032	-0.000381	0.013275
		457	0.000504	0.000671	0.000549	0.004807	0.004745	0.004684	0.009109	0.009125	0.009018	0.176712	0.175919	0.175629	0.171539	0.170898	0.170502	0.169754	0.169571	0.168793	0.389969	0.388977	0.387909	0.380081	0.37851	0.377686	0.373596	0.372116	0.371567		0.092331	0.09227	0.092102		0.463333	0.461655	0.460175		0.552017	0.550415	0.549622					-0.000366	-0.000351	-0.000519	0.012985
		458	0.000504	0.00058	0.000565	0.00473	0.004471	0.004593	0.00885	0.008896	0.008926	0.159531	0.159012	0.158615	0.155273	0.154678	0.154327	0.15416	0.154007	0.153107	0.352264	0.351105	0.350372	0.343674	0.342041	0.341339	0.338028	0.336578	0.336044		0.091415	0.091217	0.091263		0.418259	0.416977	0.415543		0.508423	0.507111	0.506302					-0.000366	-0.000351	-0.000595	0.012848
		459	0.000488	0.000671	0.000641	0.004715	0.004425	0.004471	0.008743	0.008865	0.008835	0.144379	0.143967	0.143433	0.140869	0.14032	0.139862	0.14032	0.140152	0.139313	0.318985	0.317688	0.317184	0.311264	0.309662	0.309219	0.306595	0.305267	0.304535		0.090637	0.0905	0.090439		0.37851	0.377319	0.376526		0.470078	0.468536	0.467972					-0.000427	-0.000412	-0.000488	0.012772
		460	0.000595	0.00058	0.000565	0.004456	0.004669	0.004517	0.008636	0.008682	0.008713	0.12999	0.129578	0.129089	0.127182	0.126678	0.126266	0.126968	0.126953	0.12616	0.287231	0.285858	0.285767	0.28038	0.279221	0.278961	0.276581	0.275894	0.275085		0.089722	0.089554	0.089584		0.341019	0.340103	0.338989		0.433365	0.43187	0.431274					-0.000534	-0.000427	-0.000504	0.012589
		461	0.00058	0.000565	0.000565	0.004379	0.004608	0.004501	0.008408	0.008484	0.008621	0.116257	0.116058	0.115509	0.114319	0.113663	0.113342	0.114456	0.114319	0.113724	0.25676	0.255661	0.255402	0.251175	0.250381	0.249954	0.248444	0.247833	0.247131		0.088882	0.088684	0.08873		0.305405	0.304459	0.303314		0.398041	0.396744	0.395981					-0.000565	-0.000412	-0.000488	0.01239
		462	0.000641	0.000671	0.000626	0.004349	0.004501	0.004517	0.008377	0.008453	0.008575	0.104218	0.103851	0.103668	0.102921	0.10228	0.102005	0.103516	0.103165	0.102844	0.229843	0.228928	0.228638	0.225372	0.224823	0.224396	0.223663	0.222778	0.222321		0.088028	0.087891	0.087936		0.273712	0.272827	0.271927		0.366531	0.365356	0.364716					-0.000504	-0.000381	-0.00058	0.012238
		463	0.000671	0.000748	0.00061	0.004272	0.00441	0.004379	0.008392	0.008347	0.008331	0.092896	0.092438	0.092484	0.092361	0.091583	0.091385	0.093262	0.092712	0.092422	0.204544	0.203827	0.203613	0.201111	0.20076	0.200302	0.200439	0.199539	0.199051		0.087189	0.087128	0.086975		0.244415	0.243576	0.242523		0.336807	0.335754	0.335327					-0.00061	-0.000427	-0.000549	0.012192
		464	0.000656	0.000702	0.000595	0.004242	0.004333	0.004196	0.00827	0.008179	0.008194	0.082458	0.08223	0.082199	0.08255	0.081787	0.081711	0.083588	0.083084	0.082916	0.181595	0.181122	0.180756	0.179108	0.178802	0.178391	0.178925	0.17807	0.177673		0.086304	0.086212	0.086136		0.21756	0.216797	0.215698		0.309464	0.308548	0.308243					-0.00058	-0.000473	-0.000458	0.011978
		465	0.000549	0.000549	0.000519	0.004166	0.004166	0.004089	0.008163	0.008118	0.008072	0.073166	0.072891	0.072937	0.073608	0.07309	0.072998	0.075073	0.074646	0.074402	0.161392	0.160934	0.160248	0.159454	0.159164	0.158691	0.159668	0.159058	0.158539		0.085495	0.085358	0.085281		0.193451	0.192841	0.191925		0.284836	0.284195	0.283752					-0.000504	-0.000488	-0.00058	0.011932
		466	0.000504	0.000656	0.000549	0.00412	0.00415	0.004044	0.008011	0.008026	0.008011	0.064987	0.064713	0.064667	0.065765	0.065399	0.065262	0.067719	0.067169	0.066971	0.143372	0.142838	0.142288	0.142151	0.14183	0.141144	0.142654	0.14212	0.141373		0.084702	0.084564	0.084457		0.172089	0.171494	0.170868		0.262878	0.262222	0.261703					-0.000458	-0.000473	-0.00061	0.011734
		467	0.000473	0.00061	0.00058	0.003998	0.004044	0.003998	0.007858	0.007904	0.007874	0.057571	0.057251	0.057083	0.058426	0.058029	0.057983	0.060638	0.060211	0.059952	0.126572	0.126099	0.125671	0.126083	0.125549	0.125031	0.126892	0.12645	0.125732		0.083847	0.08374	0.083664		0.152405	0.151962	0.151352		0.242188	0.241562	0.240997					-0.000473	-0.000519	-0.00061	0.011475
		468	0.000534	0.000595	0.000595	0.003967	0.004028	0.003983	0.007828	0.007797	0.007782	0.05072	0.050491	0.05011	0.051895	0.051605	0.051392	0.054214	0.053925	0.053711	0.111267	0.110977	0.110519	0.111267	0.110901	0.110321	0.112396	0.112183	0.111465		0.083115	0.082947	0.082886		0.134354	0.133957	0.133377		0.222992	0.222519	0.221939					-0.000534	-0.000488	-0.00058	0.011307
		469	0.000565	0.000595	0.000641	0.003906	0.004013	0.003937	0.007645	0.00766	0.007599	0.044479	0.044159	0.043915	0.045898	0.045609	0.04538	0.048309	0.048141	0.047897	0.097397	0.097183	0.09671	0.097763	0.097549	0.097015	0.099258	0.099136	0.098495		0.08223	0.082123	0.082092		0.117859	0.117615	0.11702		0.205414	0.20488	0.204315					-0.000458	-0.000458	-0.00058	0.011093
		470	0.000626	0.000641	0.00061	0.003922	0.003967	0.003983	0.007629	0.007645	0.007553	0.039017	0.038742	0.038513	0.040649	0.040268	0.040192	0.043228	0.043015	0.042892	0.085297	0.084946	0.084579	0.085968	0.085785	0.085373	0.087769	0.087677	0.087051		0.081482	0.081406	0.08136		0.103485	0.103287	0.102692		0.189774	0.18927	0.188629					-0.000412	-0.000351	-0.000473	0.011002
		471	0.00061	0.000687	0.000656	0.003891	0.003845	0.003998	0.007492	0.007507	0.007446	0.034409	0.034058	0.033783	0.036041	0.035751	0.03566	0.038834	0.03862	0.038544	0.074692	0.074341	0.074081	0.075699	0.075531	0.075272	0.07782	0.077774	0.077332		0.080688	0.080673	0.080536		0.091034	0.090805	0.090271		0.17601	0.1754	0.174896					-0.000504	-0.000381	-0.000397	0.01091
		472	0.000641	0.000656	0.000717	0.00386	0.003708	0.003891	0.007462	0.007416	0.007324	0.03006	0.029785	0.029556	0.031952	0.031601	0.03154	0.034805	0.034637	0.034515	0.065125	0.064789	0.064667	0.066559	0.066284	0.066147	0.068909	0.068756	0.068466		0.079895	0.079895	0.079742		0.079803	0.079697	0.079102		0.163315	0.162643	0.162247					-0.000519	-0.000519	-0.00058	0.010803
		473	0.000458	0.000534	0.00061	0.003845	0.003738	0.003784	0.007324	0.007187	0.007294	0.02623	0.026016	0.02594	0.028336	0.027969	0.027985	0.031235	0.031128	0.030991	0.056839	0.05658	0.056427	0.058548	0.058273	0.058197	0.061157	0.060928	0.060669		0.079132	0.079102	0.079071		0.070068	0.069855	0.069412		0.152008	0.151459	0.151093					-0.000534	-0.000412	-0.00058	0.010666
		474	0.000458	0.000473	0.000519	0.003799	0.003738	0.003693	0.007141	0.007034	0.007156	0.022903	0.022675	0.022614	0.025131	0.024918	0.024841	0.028137	0.027954	0.027969	0.049576	0.049393	0.049271	0.051422	0.051361	0.051117	0.054169	0.053955	0.053665		0.078369	0.078308	0.078247		0.06134	0.061142	0.060837		0.141937	0.141495	0.141129					-0.000488	-0.000549	-0.000549	0.010605
		475	0.00061	0.000534	0.000473	0.003769	0.003723	0.003784	0.007095	0.00708	0.007111	0.019821	0.019791	0.019699	0.022308	0.022064	0.021973	0.025345	0.025162	0.025146	0.042938	0.042725	0.04248	0.045074	0.045013	0.044678	0.04776	0.047592	0.047318		0.077621	0.07753	0.077484		0.053284	0.053299	0.052979		0.132584	0.132111	0.131821					-0.000549	-0.000519	-0.000626	0.010345
		476	0.000443	0.000626	0.000565	0.003769	0.003845	0.003799	0.007004	0.006927	0.00705	0.017319	0.017151	0.017197	0.019943	0.01973	0.019577	0.023026	0.022736	0.022781	0.03743	0.037247	0.036957	0.039658	0.03952	0.039398	0.04248	0.042252	0.042099		0.076874	0.076813	0.076813		0.046631	0.046738	0.046417		0.124451	0.124115	0.123856					-0.000397	-0.000443	-0.000565	0.010239
		477	0.000565	0.000687	0.000656	0.003647	0.003677	0.003723	0.006989	0.006836	0.006958	0.015213	0.015091	0.01506	0.017761	0.017609	0.017563	0.02095	0.02066	0.020737	0.032654	0.032455	0.03241	0.035065	0.034882	0.034744	0.03804	0.03775	0.037506		0.076294	0.076065	0.076126		0.040939	0.040985	0.040741		0.117294	0.116974	0.116806					-0.000366	-0.000381	-0.000473	0.010178
		478	0.000397	0.000641	0.000427	0.003464	0.003525	0.00354	0.006744	0.006607	0.006683	0.013062	0.012924	0.012863	0.015747	0.015518	0.015366	0.018829	0.01857	0.018784	0.028214	0.027969	0.027924	0.030685	0.030563	0.030319	0.033752	0.033463	0.033264		0.075287	0.07518	0.07515		0.035522	0.035645	0.035477		0.110489	0.110245	0.110031					-0.000656	-0.000504	-0.000671	0.009857
		479	0.000488	0.000504	0.000504	0.003464	0.003433	0.003387	0.006607	0.006561	0.006561	0.011353	0.01123	0.011292	0.014069	0.013824	0.013702	0.017181	0.017044	0.017136	0.02446	0.024323	0.024216	0.027039	0.026917	0.026779	0.030151	0.029831	0.029648		0.074585	0.074493	0.074493		0.031143	0.031219	0.031067		0.104721	0.104462	0.104202					-0.000595	-0.000565	-0.000656	0.009781
		480	0.000504	0.000519	0.000488	0.003342	0.003296	0.003342	0.006546	0.006454	0.006409	0.009964	0.009872	0.009857	0.012543	0.012421	0.012283	0.015686	0.015594	0.015717	0.02121	0.021088	0.020981	0.023895	0.023697	0.023727	0.026901	0.026764	0.026611		0.073776	0.073715	0.073761		0.027313	0.027405	0.027328		0.099579	0.099304	0.099075					-0.000595	-0.000641	-0.000641	0.009613
		481	0.00058	0.000656	0.000549	0.003403	0.003342	0.003372	0.006485	0.006439	0.006454	0.008789	0.008652	0.008499	0.011307	0.011292	0.011078	0.014511	0.014404	0.014572	0.018524	0.018387	0.018265	0.021317	0.021133	0.021011	0.024261	0.024109	0.023956		0.073227	0.073166	0.07309		0.024109	0.024139	0.024002		0.094925	0.094681	0.094498					-0.000488	-0.000488	-0.000488	0.009583
		482	0.000504	0.000656	0.000549	0.003342	0.003326	0.003265	0.006485	0.006271	0.006317	0.00769	0.007584	0.007492	0.010254	0.010254	0.010223	0.013504	0.013336	0.013458	0.016144	0.01593	0.0159	0.018875	0.01889	0.0186	0.021851	0.021713	0.021591		0.072495	0.072342	0.072311		0.021271	0.021255	0.021179		0.090668	0.090347	0.090302					-0.000458	-0.000488	-0.000488	0.00943
		483	0.000412	0.00058	0.000473	0.003296	0.003189	0.003159	0.006226	0.006165	0.006149	0.006592	0.006699	0.006653	0.009277	0.009201	0.009308	0.012466	0.012436	0.01236	0.014008	0.013809	0.013718	0.016769	0.016663	0.016586	0.019836	0.019699	0.019501		0.071793	0.071579	0.071579		0.018707	0.018753	0.018723		0.086914	0.086548	0.086472					-0.000488	-0.000549	-0.00061	0.009308
		484	0.000427	0.00058	0.000519	0.003296	0.003189	0.003128	0.006134	0.006042	0.006012	0.005768	0.005768	0.005676	0.008453	0.008362	0.008362	0.011536	0.011536	0.011475	0.012161	0.011978	0.011948	0.014923	0.014664	0.014877	0.018051	0.017975	0.017807		0.071091	0.070816	0.070908		0.016464	0.016586	0.016571		0.083557	0.083145	0.083084					-0.000565	-0.000549	-0.000595	0.00914
		485	0.000351	0.000519	0.000427	0.003098	0.003113	0.003052	0.006012	0.005875	0.00592	0.004944	0.004944	0.004929	0.007706	0.007645	0.007477	0.010803	0.01062	0.01062	0.010483	0.010361	0.010391	0.013275	0.012939	0.013199	0.016403	0.016357	0.016251		0.070313	0.070053	0.07019		0.014481	0.014603	0.014618		0.080338	0.079987	0.079971					-0.000656	-0.00061	-0.000702	0.008942
		486	0.000473	0.000534	0.000458	0.003052	0.003128	0.002975	0.005966	0.005844	0.005859	0.004425	0.004349	0.004318	0.007126	0.006943	0.006958	0.010178	0.009995	0.010025	0.009186	0.009033	0.00914	0.011948	0.011826	0.011856	0.014984	0.01503	0.014771		0.06958	0.069489	0.069473		0.01297	0.013046	0.013016		0.077713	0.077347	0.077286					-0.000626	-0.000549	-0.000717	0.008804
		487	0.000458	0.000488	0.000412	0.00296	0.00293	0.002945	0.005783	0.005722	0.005707	0.003906	0.003799	0.003754	0.006454	0.006393	0.006378	0.00946	0.00946	0.009415	0.007996	0.007858	0.007965	0.010712	0.010681	0.010742	0.013809	0.013809	0.01358		0.068848	0.068756	0.068741		0.011566	0.011551	0.011612		0.075241	0.07489	0.074814					-0.000702	-0.000626	-0.000687	0.008667
		488	0.000519	0.000488	0.000381	0.00296	0.002899	0.00293	0.005615	0.005661	0.005646	0.003464	0.003433	0.003326	0.006042	0.00592	0.005936	0.008972	0.008911	0.009003	0.007034	0.006943	0.006958	0.009735	0.009796	0.009811	0.012772	0.012726	0.01265		0.068161	0.068008	0.068008		0.010284	0.010345	0.010345		0.07309	0.072693	0.072571					-0.000595	-0.00061	-0.000671	0.008591
		489	0.000534	0.000458	0.000504	0.00293	0.003021	0.002884	0.005554	0.0056	0.005585	0.003036	0.003052	0.00296	0.005692	0.005493	0.005508	0.008621	0.008575	0.008621	0.006256	0.006088	0.00618	0.008911	0.009033	0.008942	0.011902	0.011826	0.011887		0.067612	0.067383	0.067429		0.009201	0.009338	0.009476		0.071075	0.070663	0.070602					-0.000519	-0.000519	-0.000595	0.008484
		490	0.000488	0.000549	0.000504	0.002899	0.00293	0.002884	0.005539	0.005432	0.005508	0.002701	0.002716	0.002686	0.005325	0.005173	0.005173	0.008194	0.008179	0.008179	0.005478	0.005447	0.005463	0.008118	0.008301	0.008148	0.011124	0.011032	0.011063		0.06694	0.066788	0.066803		0.008423	0.008438	0.008591		0.069061	0.068863	0.068787					-0.000549	-0.000427	-0.000549	0.008408
		491	0.000458	0.000549	0.000427	0.002899	0.002884	0.002838	0.005463	0.005371	0.005463	0.002426	0.002441	0.002411	0.00502	0.004974	0.00499	0.007858	0.007706	0.007721	0.004761	0.004776	0.004776	0.007492	0.007584	0.007492	0.010422	0.010239	0.010376		0.066177	0.066116	0.06601		0.007645	0.007782	0.007767		0.06723	0.067123	0.067062					-0.000595	-0.000443	-0.000595	0.008331
		492	0.00058	0.000534	0.000412	0.002838	0.002792	0.002762	0.005356	0.005341	0.005325	0.002197	0.002167	0.002106	0.004669	0.004654	0.004532	0.007446	0.007431	0.007507	0.004166	0.004135	0.00415	0.006851	0.006973	0.006866	0.009735	0.009659	0.009689		0.065445	0.065353	0.065277		0.006897	0.007095	0.007095		0.065674	0.065567	0.065399					-0.000626	-0.000488	-0.000549	0.008148
		493	0.000549	0.00058	0.000412	0.002762	0.002686	0.002747	0.005264	0.005264	0.005173	0.001846	0.001923	0.001923	0.00444	0.004333	0.004257	0.007233	0.007126	0.007202	0.003754	0.003708	0.003586	0.006454	0.006393	0.006332	0.009094	0.009109	0.009186		0.06485	0.064636	0.064697		0.00621	0.006454	0.0065		0.064285	0.064102	0.063934					-0.00061	-0.00061	-0.000381	0.008072
		494	0.000504	0.00061	0.000473	0.002701	0.002686	0.002762	0.005188	0.005066	0.005051	0.001694	0.001801	0.001831	0.004196	0.004105	0.004028	0.007004	0.006897	0.007034	0.003387	0.003281	0.003235	0.005966	0.005981	0.005905	0.008606	0.008667	0.008698		0.064163	0.063873	0.064041		0.005753	0.005905	0.006027		0.062943	0.062744	0.062592					-0.000488	-0.00061	-0.000443	0.00795
		495	0.000504	0.000656	0.000519	0.002762	0.002686	0.002686	0.005066	0.00499	0.00499	0.001572	0.001556	0.001678	0.003967	0.003906	0.003876	0.006744	0.006516	0.006714	0.003021	0.002991	0.002884	0.005539	0.005615	0.005508	0.008118	0.008286	0.008179		0.063339	0.063278	0.063324		0.00528	0.005478	0.005569		0.061615	0.061386	0.061356					-0.000504	-0.000549	-0.000549	0.007736
		496	0.000504	0.000717	0.000565	0.002716	0.002762	0.002686	0.004974	0.004944	0.004974	0.001541	0.001495	0.001541	0.00386	0.003754	0.003784	0.006424	0.006393	0.0065	0.002686	0.002731	0.002625	0.005234	0.005142	0.005112	0.007736	0.00795	0.007889		0.062653	0.062607	0.062729		0.004959	0.005142	0.005219		0.060318	0.060272	0.06012					-0.000458	-0.000381	-0.000595	0.007751
		497	0.000565	0.00061	0.000473	0.002609	0.002731	0.002579	0.004883	0.004822	0.004837	0.001251	0.001297	0.001419	0.003662	0.003525	0.003586	0.00621	0.006104	0.006195	0.00238	0.002319	0.002319	0.004868	0.004883	0.004791	0.007416	0.007431	0.007446		0.061966	0.06189	0.061981		0.004547	0.004715	0.004929		0.059219	0.059128	0.059052					-0.000488	-0.000443	-0.00058	0.007553
		498	0.000488	0.000504	0.000412	0.002518	0.002563	0.002457	0.004776	0.004623	0.004654	0.001038	0.001083	0.001053	0.003448	0.003326	0.003403	0.005997	0.005875	0.005936	0.002029	0.002045	0.002029	0.004547	0.004578	0.004532	0.007141	0.007095	0.007034		0.061203	0.061157	0.061127		0.00415	0.004456	0.004593		0.058212	0.057999	0.057922					-0.000534	-0.000488	-0.000748	0.007324
		499	0.000427	0.000412	0.00032	0.002335	0.00235	0.002319	0.004532	0.00444	0.004471	0.000931	0.0009	0.00087	0.003204	0.003128	0.003159	0.005722	0.005615	0.005646	0.00174	0.001724	0.00177	0.004196	0.004166	0.00415	0.006714	0.006744	0.006744		0.060501	0.060379	0.060364		0.003723	0.004105	0.00415		0.057098	0.056976	0.056915					-0.000732	-0.000656	-0.000839	0.007019
		500	0.000473	0.000534	0.000473	0.002472	0.002365	0.002441	0.004669	0.004532	0.004471	0.000977	0.000961	0.000946	0.003265	0.003159	0.003143	0.005783	0.005554	0.005615	0.001678	0.001587	0.001755	0.004105	0.00412	0.004013	0.006592	0.006561	0.006683		0.059967	0.059891	0.059875		0.003723	0.004074	0.004044		0.05632	0.056198	0.056122					-0.000565	-0.000626	-0.000626	0.007095
		501	0.000412	0.000458	0.000412	0.002335	0.002243	0.002335	0.004532	0.004379	0.004379	0.0009	0.000916	0.000854	0.003006	0.003067	0.00293	0.005478	0.005356	0.005386	0.00148	0.001434	0.001602	0.00386	0.003952	0.003876	0.006317	0.006256	0.006409		0.059372	0.059235	0.059113		0.003448	0.003754	0.003784		0.055527	0.055191	0.055191					-0.000641	-0.00058	-0.000656	0.006943
		502	0.000534	0.000519	0.000473	0.00238	0.002304	0.002289	0.004379	0.004349	0.004395	0.000839	0.00087	0.000916	0.003052	0.003113	0.002899	0.00531	0.005264	0.00531	0.001465	0.001419	0.001541	0.00383	0.003723	0.003723	0.00618	0.006134	0.006241		0.058685	0.058655	0.058487		0.003326	0.003632	0.003708		0.054672	0.054489	0.054504					-0.000519	-0.000565	-0.000671	0.006897
		503	0.000519	0.000534	0.000488	0.002396	0.002289	0.002243	0.004272	0.004257	0.004333	0.000778	0.000763	0.000824	0.002945	0.002869	0.002762	0.005219	0.005142	0.005188	0.001282	0.001282	0.001465	0.003616	0.00354	0.003601	0.006073	0.005951	0.005905		0.058014	0.057922	0.05777		0.00325	0.003464	0.00351		0.053757	0.053741	0.053772					-0.000519	-0.00061	-0.000534	0.00676
		504	0.000412	0.000504	0.000443	0.002274	0.002258	0.002213	0.004318	0.004135	0.004211	0.000793	0.000702	0.000809	0.002869	0.002762	0.00264	0.005066	0.005035	0.00499	0.001205	0.001175	0.001297	0.00354	0.003433	0.003403	0.005814	0.005722	0.005646		0.057281	0.057251	0.057098		0.003128	0.003342	0.003372		0.052979	0.052994	0.052841					-0.000595	-0.000641	-0.000458	0.006668
		505	0.000488	0.000565	0.000397	0.002182	0.002167	0.002258	0.004211	0.004211	0.00415	0.000763	0.000717	0.000717	0.002762	0.002747	0.002533	0.00499	0.005035	0.004959	0.001144	0.001129	0.00116	0.003326	0.003311	0.003265	0.005569	0.005569	0.0056		0.056671	0.056641	0.056625		0.00296	0.003204	0.00325		0.052368	0.052307	0.052139					-0.00058	-0.000549	-0.00058	0.006577
		506	0.000534	0.000565	0.000473	0.002213	0.002182	0.002274	0.004135	0.004089	0.004089	0.000702	0.000717	0.000641	0.002701	0.002609	0.002594	0.004944	0.004974	0.004868	0.001114	0.001038	0.001038	0.003204	0.00325	0.003174	0.005447	0.005432	0.005585		0.056137	0.056091	0.056046		0.002899	0.003082	0.003174		0.051666	0.051559	0.051529					-0.00061	-0.000519	-0.000519	0.006485
		507	0.000397	0.000427	0.00032	0.002075	0.001999	0.002106	0.003952	0.003784	0.00383	0.000488	0.000656	0.000534	0.002457	0.002396	0.002441	0.004654	0.00473	0.004639	0.000931	0.000946	0.000793	0.002991	0.003036	0.003006	0.005203	0.005219	0.005081		0.055344	0.055359	0.055222		0.00264	0.002899	0.002975		0.050858	0.05069	0.050705					-0.000687	-0.000748	-0.000595	0.006332
		508	0.000443	0.000458	0.000336	0.001999	0.001938	0.002045	0.00386	0.003693	0.00386	0.000534	0.000687	0.000534	0.002472	0.002365	0.002426	0.004593	0.004456	0.004501	0.000885	0.00087	0.000793	0.003036	0.002945	0.002975	0.005051	0.005066	0.004974		0.054657	0.054718	0.054565		0.002579	0.002869	0.00296		0.050201	0.050156	0.050095					-0.000671	-0.000687	-0.000656	0.006134
		509	0.000443	0.000519	0.000351	0.001968	0.001938	0.001984	0.003708	0.003632	0.003845	0.000519	0.000641	0.000504	0.002457	0.002243	0.00238	0.004486	0.004349	0.004425	0.000763	0.000717	0.000748	0.002991	0.002914	0.002945	0.005005	0.004944	0.004929		0.054169	0.054016	0.05397		0.002518	0.002823	0.002869		0.049606	0.0495	0.049484					-0.000671	-0.00061	-0.000549	0.006088
		510	0.000366	0.000366	0.000229	0.001892	0.001892	0.001877	0.003601	0.003525	0.003586	0.000381	0.000397	0.000366	0.002228	0.002106	0.002121	0.004196	0.004196	0.004318	0.000687	0.000549	0.000671	0.002609	0.002701	0.00267	0.004852	0.004715	0.004868		0.053406	0.053314	0.053238		0.002396	0.002625	0.002731		0.04892	0.048752	0.048737					-0.000717	-0.000687	-0.000671	0.005814
		511	0.000565	0.000519	0.000443	0.002014	0.001999	0.002014	0.003586	0.003586	0.003616	0.000549	0.000549	0.000473	0.002258	0.002182	0.002213	0.004318	0.004318	0.004272	0.000702	0.000702	0.000763	0.002579	0.002686	0.002762	0.004715	0.004715	0.004837		0.052917	0.052887	0.052841		0.00238	0.002701	0.002808		0.048325	0.048218	0.048248					-0.000595	-0.000549	-0.000717	0.005844
		512	0.00058	0.000565	0.000534	0.001984	0.001938	0.002029	0.003662	0.003525	0.003525	0.000504	0.000534	0.000534	0.002365	0.002213	0.002243	0.004227	0.00415	0.004211	0.000671	0.000702	0.000687	0.002609	0.00264	0.002655	0.004654	0.004608	0.004745		0.052338	0.052307	0.052231		0.002396	0.002686	0.002731		0.04776	0.047714	0.047638					-0.000549	-0.000473	-0.000595	0.005829
		513	0.000443	0.000381	0.00058	0.00174	0.001724	0.001862	0.003494	0.003342	0.003265	0.000351	0.000336	0.000397	0.002319	0.001984	0.002106	0.004013	0.003998	0.003967	0.000473	0.000534	0.000473	0.002365	0.002533	0.002457	0.004395	0.004364	0.00441		0.051666	0.051498	0.051498		0.002213	0.002533	0.002594		0.047226	0.047104	0.046921					-0.00061	-0.000671	-0.000732	0.005569
		514	0.000336	0.000412	0.000473	0.001785	0.001724	0.001724	0.003311	0.003265	0.003342	0.000412	0.000504	0.000412	0.002228	0.001907	0.002121	0.004013	0.003845	0.003922	0.00058	0.000519	0.000504	0.002411	0.002533	0.002457	0.004349	0.004333	0.004349		0.051163	0.050919	0.05101		0.002258	0.002411	0.002502		0.046677	0.046539	0.046478					-0.000565	-0.000702	-0.000656	0.005554
		515	0.000412	0.000458	0.000458	0.001862	0.001877	0.001801	0.003235	0.003204	0.003159	0.000412	0.000458	0.00032	0.002075	0.001862	0.00206	0.003876	0.003754	0.003799	0.000565	0.000504	0.000519	0.002365	0.002472	0.00238	0.004257	0.004242	0.004272		0.050491	0.05043	0.050415		0.002197	0.002502	0.002472		0.046051	0.046036	0.045944					-0.000565	-0.000595	-0.000717	0.005432
		516	0.000443	0.000458	0.000381	0.001816	0.001862	0.001785	0.003143	0.00325	0.003159	0.000366	0.000458	0.000259	0.001984	0.001846	0.001831	0.003769	0.003693	0.003693	0.000397	0.000504	0.000443	0.002304	0.002304	0.002304	0.004135	0.004211	0.00412		0.049881	0.049835	0.049744		0.002106	0.002396	0.002426		0.045532	0.045456	0.045319					-0.00061	-0.000641	-0.000763	0.005264
		517	0.000534	0.000519	0.000427	0.001755	0.001785	0.001694	0.003159	0.003189	0.003036	0.000473	0.000473	0.000397	0.002014	0.001892	0.001831	0.003754	0.003571	0.003693	0.000488	0.000427	0.000519	0.002274	0.002151	0.002365	0.004089	0.004257	0.004089		0.049438	0.049301	0.049332		0.002121	0.002441	0.002426		0.044937	0.044891	0.04483					-0.000641	-0.000626	-0.000671	0.005249
		518	0.00058	0.000565	0.000519	0.001678	0.00174	0.001602	0.003128	0.003113	0.003128	0.000458	0.000397	0.000458	0.002029	0.001892	0.001785	0.003693	0.003601	0.003662	0.000458	0.000458	0.000412	0.002335	0.002457	0.00238	0.004105	0.004135	0.004044		0.048904	0.048721	0.048737		0.002182	0.002457	0.002411		0.044464	0.044418	0.044342					-0.000549	-0.00058	-0.000595	0.005188
		519	0.000565	0.000488	0.00061	0.001694	0.00174	0.001556	0.003052	0.003021	0.003082	0.000519	0.000458	0.000473	0.001938	0.001862	0.001801	0.003616	0.003571	0.003571	0.000534	0.000473	0.000397	0.002289	0.002136	0.00235	0.003983	0.004044	0.003937		0.048035	0.048141	0.048141		0.002106	0.002411	0.002335		0.0439	0.043884	0.043854					-0.000549	-0.000519	-0.00058	0.005142
		520	0.000351	0.000504	0.000488	0.001678	0.001678	0.001526	0.002914	0.002823	0.002975	0.000397	0.000397	0.000397	0.001846	0.001755	0.001678	0.003433	0.003372	0.003571	0.000473	0.000381	0.000305	0.002106	0.00209	0.002228	0.003784	0.00383	0.003815		0.04747	0.04747	0.047562		0.001984	0.002289	0.002243		0.043335	0.043259	0.043335					-0.00061	-0.00058	-0.000641	0.004944
		521	0.000473	0.000534	0.000595	0.001785	0.00174	0.001663	0.002945	0.002838	0.002853	0.000412	0.000443	0.000458	0.001892	0.001816	0.00177	0.003464	0.003464	0.003525	0.000549	0.000534	0.000412	0.002213	0.002197	0.002151	0.00383	0.003769	0.003784		0.047211	0.046967	0.047134		0.001984	0.002274	0.002289		0.042984	0.042938	0.042923					-0.000534	-0.000488	-0.00061	0.005005
		522	0.000519	0.000565	0.000549	0.001617	0.001755	0.001602	0.002823	0.002777	0.002792	0.000381	0.000381	0.00058	0.001785	0.001724	0.001785	0.003433	0.003296	0.003311	0.000519	0.000427	0.000397	0.002136	0.002136	0.00209	0.003738	0.003769	0.003677		0.04657	0.046417	0.046402		0.001999	0.002258	0.002258		0.042435	0.042419	0.042389					-0.00061	-0.000687	-0.000595	0.004883
		523	0.000412	0.000473	0.000336	0.001389	0.001587	0.00145	0.002686	0.00264	0.00267	0.00032	0.000275	0.000351	0.001785	0.001694	0.001572	0.003235	0.003128	0.003265	0.000381	0.000214	0.000229	0.001938	0.001831	0.001953	0.003586	0.003601	0.003479		0.045883	0.045837	0.045837		0.001755	0.002136	0.002106		0.04187	0.041885	0.041824					-0.000641	-0.000778	-0.000824	0.004776
		524	0.000381	0.000488	0.000336	0.001526	0.001587	0.001511	0.002686	0.002655	0.002701	0.000351	0.00032	0.000366	0.001785	0.001694	0.001572	0.00325	0.003128	0.003189	0.000397	0.000305	0.000305	0.001953	0.001892	0.002014	0.00354	0.003571	0.003525		0.045395	0.045364	0.045395		0.001846	0.002197	0.002167		0.041473	0.041458	0.041397					-0.00061	-0.000687	-0.000687	0.00473
		525	0.000381	0.000473	0.000397	0.001511	0.001633	0.001434	0.00264	0.002594	0.002563	0.00029	0.000351	0.000366	0.001663	0.001556	0.001495	0.003235	0.003143	0.003128	0.000351	0.000259	0.000259	0.001862	0.001831	0.001862	0.003464	0.00351	0.003494		0.044876	0.044754	0.0448		0.001923	0.002197	0.002319		0.040955	0.041	0.040939					-0.00061	-0.000626	-0.000595	0.004578
		526	0.000366	0.000381	0.000366	0.001389	0.001419	0.001328	0.002487	0.002472	0.002487	0.000244	0.000259	0.000351	0.001602	0.001389	0.001434	0.003128	0.00296	0.003098	0.00032	0.000214	0.000168	0.001831	0.001724	0.00177	0.003357	0.003326	0.003296		0.044373	0.044144	0.04425		0.001801	0.00206	0.002258		0.040497	0.040482	0.040451					-0.000687	-0.000717	-0.000626	0.004471
		527	0.000427	0.000504	0.000366	0.001495	0.001389	0.001358	0.002563	0.002365	0.002487	0.000259	0.000305	0.000366	0.001648	0.001419	0.00148	0.003067	0.002853	0.003021	0.00032	0.000244	0.000259	0.001877	0.001755	0.001862	0.003433	0.003387	0.003265		0.043808	0.043716	0.043716		0.001846	0.002029	0.002121		0.040176	0.039948	0.040039					-0.00061	-0.000656	-0.00061	0.004364
		528	0.000488	0.000488	0.000381	0.001511	0.001434	0.001312	0.002441	0.002335	0.002426	0.000259	0.000275	0.000229	0.001556	0.001465	0.001572	0.00296	0.002975	0.002991	0.000275	0.00032	0.000275	0.001801	0.001755	0.001816	0.003372	0.003433	0.003311		0.04332	0.043213	0.043228		0.001785	0.002014	0.002075		0.039688	0.039581	0.039566					-0.000519	-0.000671	-0.00061	0.004242
		529	0.000473	0.000443	0.000351	0.001404	0.001389	0.001282	0.00238	0.002289	0.002289	0.000259	0.00029	0.00029	0.001572	0.001373	0.001312	0.00293	0.002945	0.002991	0.000336	0.000275	0.000259	0.001755	0.00174	0.001678	0.003159	0.003189	0.003159		0.042847	0.042816	0.04274		0.001678	0.001953	0.002045		0.039124	0.039032	0.039063					-0.000626	-0.000656	-0.000565	0.004196
		530	0.000443	0.000443	0.000381	0.001328	0.001328	0.001251	0.002274	0.002213	0.002228	0.000198	0.000259	0.000183	0.001648	0.001312	0.001282	0.002686	0.002686	0.002853	0.000214	0.000153	0.000214	0.001755	0.001785	0.001617	0.003098	0.003113	0.00322		0.042267	0.042267	0.042252		0.001602	0.001953	0.002029		0.038757	0.038666	0.03862					-0.000626	-0.000626	-0.000763	0.004074
		531	0.000427	0.000427	0.000336	0.001328	0.001251	0.001297	0.002182	0.002182	0.002274	0.000183	0.000137	0.000153	0.001572	0.001266	0.001266	0.002731	0.002609	0.002716	0.000183	0.000122	0.000244	0.001648	0.001663	0.001663	0.003052	0.003082	0.003082		0.041748	0.041687	0.041748		0.001556	0.001877	0.002029		0.0383	0.038223	0.038223					-0.000626	-0.00061	-0.000732	0.004089
		532	0.000412	0.000259	0.000275	0.00119	0.00119	0.001144	0.002167	0.001953	0.002075	0.000168	1.5e-05	9.2e-05	0.001236	0.001175	0.00116	0.002716	0.002548	0.002625	9.2e-05	7.6e-05	0.000183	0.001495	0.001358	0.001511	0.002991	0.00293	0.002853		0.041183	0.041153	0.041138		0.001465	0.001724	0.001801		0.03772	0.037704	0.037704					-0.000732	-0.000748	-0.000778	0.003998
		533	0.000504	0.000381	0.000412	0.00116	0.001266	0.001175	0.002121	0.002045	0.00209	0.000244	0.000168	0.000168	0.001282	0.001099	0.00116	0.002731	0.002502	0.002655	0.000229	0.000107	3.1e-05	0.001526	0.001389	0.001526	0.002808	0.002899	0.002884		0.040741	0.040726	0.040695		0.001541	0.001709	0.001816		0.037369	0.037323	0.037399					-0.000656	-0.000717	-0.000732	0.003937
		534	0.000381	0.000397	0.000473	0.00119	0.001251	0.001251	0.002106	0.002075	0.002045	9.2e-05	0.000198	0.000168	0.001328	0.00119	0.00116	0.002701	0.00264	0.00264	0.000168	0.000137	0.000137	0.001556	0.001495	0.001511	0.002853	0.002899	0.002884		0.040268	0.040207	0.040253		0.001541	0.001816	0.001953		0.037064	0.036972	0.037079					-0.000626	-0.00061	-0.000717	0.00386
		535	0.000305	0.000397	0.00058	0.001251	0.001114	0.001129	0.00206	0.002029	0.002045	0.000122	0.000168	0.000137	0.001175	0.001068	0.00116	0.002701	0.002533	0.002563	6.1e-05	0.000107	0	0.001572	0.00145	0.001389	0.002869	0.002899	0.002853		0.039795	0.039749	0.03981		0.001404	0.001709	0.001892		0.036636	0.036575	0.036621					-0.000656	-0.000641	-0.000748	0.003738
		536	0.000412	0.000488	0.000427	0.001205	0.001251	0.001129	0.00209	0.00206	0.002029	0.000198	0.000259	0.000214	0.001251	0.001282	0.001175	0.002563	0.002518	0.002533	0.000122	4.6e-05	0.000122	0.00148	0.001434	0.001465	0.002792	0.002838	0.002792		0.039413	0.039322	0.039383		0.001434	0.001755	0.001892		0.03624	0.03627	0.036224					-0.000519	-0.000641	-0.000687	0.003723
		537	0.000412	0.000366	0.000229	0.001007	0.001205	0.001038	0.001907	0.001892	0.001862	6.1e-05	0.000244	9.2e-05	0.001144	0.00119	0.001114	0.002396	0.002335	0.002457	9.2e-05	-3.1e-05	3.1e-05	0.001373	0.001282	0.001343	0.00264	0.002686	0.002655		0.038879	0.038788	0.038834		0.001343	0.001648	0.001694		0.035736	0.035721	0.03569					-0.00061	-0.000748	-0.000778	0.003677
		538	0.000351	0.000259	0.000198	0.000961	0.001053	0.000885	0.001755	0.001755	0.00177	3.1e-05	9.2e-05	-1.5e-05	0.001022	0.000931	0.000992	0.002289	0.002304	0.002335	-3.1e-05	-0.000137	-7.6e-05	0.00119	0.001205	0.001221	0.002533	0.002502	0.002518		0.038177	0.038223	0.038208		0.001129	0.001526	0.001495		0.035248	0.035248	0.035156					-0.000885	-0.000839	-0.000824	0.003433
		539	0.000305	0.00029	0.00032	0.000992	0.001205	0.000992	0.001755	0.001709	0.00177	6.1e-05	9.2e-05	0	0.001083	0.000977	0.000946	0.002258	0.00235	0.002335	7.6e-05	-4.6e-05	-9.2e-05	0.001282	0.001205	0.001205	0.002441	0.002457	0.002472		0.037949	0.037781	0.037811		0.001205	0.001587	0.001572		0.034851	0.034912	0.034805					-0.000778	-0.000748	-0.000824	0.003372
		540	0.000381	0.00032	0.000412	0.001007	0.001266	0.001068	0.00177	0.00177	0.001831	0.000137	6.1e-05	6.1e-05	0.001175	0.000961	0.001068	0.002319	0.002365	0.002228	0.000107	1.5e-05	-4.6e-05	0.001297	0.001266	0.001251	0.002518	0.002472	0.002457		0.037704	0.037415	0.03743		0.001297	0.001633	0.001663		0.034485	0.034683	0.034561					-0.000778	-0.000687	-0.000687	0.003448
		541	0.000473	0.000443	0.000488	0.001144	0.001236	0.001038	0.001938	0.001892	0.001877	0.000275	0.000137	0.000137	0.001236	0.000961	0.001144	0.00238	0.002258	0.002228	0.000168	6.1e-05	0.000137	0.001373	0.001343	0.001373	0.002502	0.002502	0.002579		0.036987	0.037033	0.037064		0.001343	0.001724	0.001648		0.034256	0.034363	0.034256					-0.000702	-0.000687	-0.00061	0.003479
		542	0.000458	0.000351	0.000366	0.001068	0.001068	0.001022	0.001877	0.001755	0.001816	0.000259	9.2e-05	9.2e-05	0.001129	0.001007	0.001053	0.002319	0.002167	0.002197	0.000107	-4.6e-05	9.2e-05	0.001282	0.001205	0.001343	0.002518	0.002411	0.002457		0.036514	0.036469	0.036636		0.001282	0.001572	0.001633		0.033859	0.033768	0.033813					-0.000702	-0.00061	-0.000656	0.003372
		543	0.000366	0.000336	0.00032	0.001022	0.001053	0.001038	0.001831	0.001694	0.001709	3.1e-05	3.1e-05	6.1e-05	0.001038	0.001007	0.000992	0.002182	0.002151	0.00209	6.1e-05	1.5e-05	-6.1e-05	0.001236	0.001129	0.001343	0.002457	0.002411	0.002441		0.036041	0.036087	0.036133		0.001312	0.001419	0.001602		0.033493	0.033417	0.033401					-0.000671	-0.000778	-0.000793	0.003159
		544	0.000381	0.000366	0.000397	0.001068	0.001083	0.001022	0.001785	0.001663	0.001755	6.1e-05	0.000122	0.000107	0.001099	0.000961	0.001053	0.002167	0.002151	0.002182	6.1e-05	4.6e-05	-7.6e-05	0.00119	0.00119	0.001266	0.00238	0.002441	0.002594		0.035629	0.035583	0.035767		0.001251	0.001587	0.001587		0.033234	0.033051	0.033142					-0.000641	-0.000763	-0.000748	0.003174
		545	0.000366	0.000443	0.000336	0.001007	0.000992	0.000992	0.001709	0.001694	0.001724	0.000137	0.000122	3.1e-05	0.001068	0.001038	0.001007	0.002106	0.001999	0.002182	-3.1e-05	0	-1.5e-05	0.001083	0.001236	0.001282	0.00235	0.002335	0.002457		0.035126	0.035065	0.035233		0.001144	0.001694	0.001541		0.032684	0.032654	0.032654					-0.000626	-0.000656	-0.000778	0.003113
		546	0.00029	0.000351	0.000214	0.00087	0.000854	0.000824	0.001556	0.001511	0.001587	3.1e-05	-3.1e-05	-3.1e-05	0.000961	0.000885	0.000824	0.001999	0.001938	0.002106	-0.000122	-0.000168	-0.000122	0.001022	0.00116	0.001114	0.002289	0.002197	0.00238		0.034668	0.034561	0.034637		0.001175	0.001495	0.001495		0.032181	0.032303	0.032211					-0.000763	-0.000809	-0.000809	0.00296
		547	0.000427	0.000427	0.000351	0.0009	0.000824	0.000854	0.001602	0.001633	0.001587	6.1e-05	9.2e-05	4.6e-05	0.001022	0.000931	0.000977	0.002121	0.001999	0.002182	-3.1e-05	-6.1e-05	-1.5e-05	0.001175	0.001266	0.001144	0.002335	0.002319	0.002319		0.034409	0.034409	0.034241		0.001312	0.00145	0.001526		0.032013	0.032043	0.031937					-0.000717	-0.000748	-0.000656	0.003021
		548	0.000381	0.000443	0.000427	0.000931	0.000931	0.0009	0.001587	0.001572	0.001587	9.2e-05	0.000153	9.2e-05	0.000992	0.001007	0.000916	0.002106	0.002029	0.002258	-1.5e-05	-9.2e-05	-4.6e-05	0.001221	0.001221	0.001129	0.002289	0.002197	0.002258		0.033905	0.03392	0.033875		0.001144	0.001465	0.001526		0.031616	0.031677	0.031601					-0.000671	-0.000687	-0.000671	0.002914
		549	0.000412	0.000427	0.000427	0.000961	0.000961	0.000885	0.001602	0.001495	0.001526	6.1e-05	0.000122	9.2e-05	0.000931	0.00087	0.000793	0.002029	0.002045	0.002106	3.1e-05	-6.1e-05	-1.5e-05	0.001221	0.00116	0.001099	0.002289	0.002228	0.002289		0.033463	0.033401	0.033463		0.001083	0.001434	0.001602		0.031281	0.031158	0.031204					-0.000671	-0.000671	-0.000687	0.002899
		550	0.00032	0.000381	0.000381	0.000992	0.00087	0.000809	0.001602	0.001419	0.001358	1.5e-05	0.000137	7.6e-05	0.000931	0.000809	0.000854	0.001968	0.001968	0.001984	-1.5e-05	-4.6e-05	-3.1e-05	0.001144	0.001053	0.000977	0.002197	0.002228	0.002243		0.033051	0.032852	0.032974		0.001144	0.001434	0.001556		0.03093	0.030792	0.030838					-0.000702	-0.000732	-0.000656	0.002853
		551	0.00032	0.000381	0.000397	0.000961	0.000732	0.000763	0.00148	0.001343	0.001358	3.1e-05	0.000107	6.1e-05	0.000961	0.000793	0.000824	0.001831	0.001984	0.001938	0	-9.2e-05	-9.2e-05	0.001099	0.001022	0.000977	0.002167	0.002075	0.00206		0.032532	0.032471	0.032547		0.001053	0.001389	0.001541		0.030548	0.030457	0.030548					-0.000641	-0.000763	-0.000763	0.002731
		552	0.00029	0.00032	0.000397	0.000885	0.0009	0.000671	0.00145	0.001312	0.001373	0	0.000122	7.6e-05	0.000931	0.000763	0.000839	0.001831	0.001831	0.001907	-4.6e-05	-0.000168	-7.6e-05	0.000992	0.001083	0.000946	0.00209	0.001968	0.002106		0.032104	0.032059	0.03215		0.001114	0.001419	0.001495		0.030167	0.030136	0.030151					-0.00061	-0.000763	-0.000732	0.002777
		553	0.000305	0.00029	0.000214	0.000809	0.000778	0.000687	0.001419	0.001251	0.001328	-4.6e-05	3.1e-05	6.1e-05	0.000793	0.000793	0.000717	0.00177	0.00174	0.001724	-0.000107	-0.000183	-0.000107	0.000931	0.000977	0.000916	0.002045	0.001907	0.002045		0.031754	0.03157	0.031769		0.001068	0.001343	0.001404		0.029846	0.02977	0.029816					-0.000809	-0.000793	-0.000732	0.002579
		554	0.00029	0.00032	0.000305	0.000763	0.000748	0.000732	0.001465	0.001266	0.001343	1.5e-05	3.1e-05	0.000107	0.000763	0.000793	0.000763	0.001862	0.001785	0.00174	-0.000107	-0.000137	-6.1e-05	0.000916	0.000931	0.001038	0.001999	0.001907	0.00206		0.031281	0.031143	0.031326		0.001007	0.001312	0.001404		0.029587	0.02948	0.029465					-0.000702	-0.000809	-0.000717	0.002594
		555	0.00032	0.000412	0.000397	0.000748	0.000778	0.000702	0.001373	0.001282	0.001434	3.1e-05	9.2e-05	0.000107	0.000839	0.000793	0.000839	0.001907	0.001877	0.001846	4.6e-05	0	-6.1e-05	0.000961	0.000946	0.001053	0.002075	0.001984	0.001984		0.030975	0.030777	0.031021		0.001007	0.001373	0.001373		0.029251	0.029144	0.029221					-0.000626	-0.00061	-0.00058	0.002594
		556	0.000366	0.000443	0.000397	0.000717	0.000793	0.000717	0.001373	0.001205	0.001373	-3.1e-05	0.000107	0.000107	0.00087	0.000763	0.000809	0.001862	0.001831	0.00177	-1.5e-05	1.5e-05	-7.6e-05	0.000977	0.001053	0.000931	0.002029	0.001892	0.001877		0.030518	0.030365	0.030579		0.001022	0.001389	0.001373		0.028824	0.0289	0.02887					-0.000717	-0.000473	-0.000549	0.002518
		557	0.000336	0.000427	0.00032	0.000809	0.000778	0.000626	0.001343	0.001205	0.001251	1.5e-05	0.000107	1.5e-05	0.000854	0.000763	0.000793	0.001785	0.001709	0.001755	-0.000168	1.5e-05	0	0.0009	0.000992	0.00087	0.001938	0.001892	0.001892		0.030136	0.029953	0.030045		0.000946	0.001343	0.001328		0.028519	0.028458	0.028564					-0.000763	-0.000687	-0.000671	0.00238
		558	0.000351	0.000366	0.000366	0.000748	0.000732	0.000595	0.001343	0.001205	0.00119	9.2e-05	3.1e-05	3.1e-05	0.000809	0.000717	0.000778	0.001678	0.001572	0.001648	-9.2e-05	-7.6e-05	-3.1e-05	0.000809	0.00087	0.000854	0.001907	0.001831	0.001785		0.029694	0.029617	0.029709		0.001022	0.001282	0.001404		0.028275	0.028122	0.028275					-0.000687	-0.000839	-0.000702	0.00238
		559	0.00029	0.000336	0.000275	0.000687	0.000671	0.000595	0.001175	0.001144	0.001205	3.1e-05	1.5e-05	-1.5e-05	0.000748	0.000534	0.000793	0.001724	0.001541	0.001541	-3.1e-05	-0.000168	-0.000107	0.000809	0.000809	0.000824	0.001862	0.00177	0.001648		0.029327	0.029205	0.029297		0.001053	0.001236	0.001343		0.028046	0.027771	0.027969					-0.000839	-0.000839	-0.000748	0.00238
		560	0.000244	0.000244	0.00029	0.000656	0.000626	0.000549	0.001129	0.001053	0.001205	-4.6e-05	-9.2e-05	-9.2e-05	0.000717	0.000534	0.000687	0.001602	0.001419	0.001556	-0.000122	-0.000244	-0.000183	0.000824	0.000763	0.000793	0.001785	0.00174	0.001633		0.02887	0.02887	0.028931		0.001022	0.001144	0.001297		0.027588	0.027374	0.027496					-0.000793	-0.000763	-0.000809	0.002289
		561	0.000351	0.000397	0.000336	0.000671	0.000687	0.00061	0.001144	0.001129	0.001205	9.2e-05	-1.5e-05	1.5e-05	0.000809	0.00061	0.000671	0.001648	0.001495	0.001572	-0.000122	-0.000153	-0.000137	0.000854	0.000885	0.000824	0.001877	0.001801	0.001709		0.028564	0.028564	0.02861		0.000977	0.001205	0.001312		0.027237	0.027069	0.027176					-0.000717	-0.000641	-0.000702	0.002365
		562	0.000275	0.000412	0.000351	0.000641	0.000732	0.00061	0.001114	0.001129	0.001175	7.6e-05	1.5e-05	0	0.000717	0.00058	0.000641	0.001755	0.001602	0.001556	-0.000183	-6.1e-05	-0.000122	0.000854	0.000793	0.000809	0.001755	0.001724	0.001709		0.028107	0.028137	0.028229		0.0009	0.00116	0.001251		0.026932	0.026825	0.026779					-0.000793	-0.000656	-0.000702	0.002213
		563	0.00032	0.000504	0.00029	0.000687	0.000732	0.000656	0.001251	0.001129	0.001175	4.6e-05	4.6e-05	3.1e-05	0.000702	0.000656	0.000641	0.001678	0.001556	0.001587	-9.2e-05	-3.1e-05	-0.000137	0.00087	0.000809	0.000839	0.00174	0.001663	0.001755		0.027817	0.027847	0.027832		0.000977	0.00119	0.001282		0.026749	0.026688	0.026642					-0.000732	-0.000626	-0.000443	0.002243
		564	0.00032	0.000504	0.000259	0.000656	0.000656	0.00058	0.001144	0.001083	0.000992	0.000122	1.5e-05	-3.1e-05	0.000671	0.000626	0.000549	0.001526	0.00145	0.001587	-3.1e-05	-9.2e-05	-0.000153	0.000839	0.000763	0.000793	0.001709	0.001663	0.001633		0.027527	0.027466	0.027512		0.000931	0.001144	0.001343		0.026367	0.026367	0.026276					-0.000748	-0.000687	-0.000519	0.002182
		565	0.000336	0.000458	0.00029	0.000641	0.00058	0.000641	0.001099	0.000992	0.000992	0.000214	3.1e-05	7.6e-05	0.000656	0.000687	0.000656	0.001511	0.00148	0.001663	-6.1e-05	-0.000122	-9.2e-05	0.00087	0.000809	0.000732	0.001678	0.001709	0.001648		0.0271	0.027145	0.02713		0.000931	0.001114	0.001343		0.025986	0.026016	0.026031					-0.000702	-0.000687	-0.000717	0.002197
		566	0.000366	0.000366	0.00029	0.000565	0.000626	0.00058	0.001114	0.000992	0.001038	0.000229	0	4.6e-05	0.000641	0.000626	0.000702	0.001526	0.001526	0.001663	-9.2e-05	-0.000168	-0.000122	0.000854	0.000793	0.000732	0.001678	0.001602	0.001648		0.026764	0.026688	0.026794		0.000916	0.001205	0.001389		0.025757	0.025726	0.025742					-0.00061	-0.000687	-0.00061	0.002182
		567	0.000458	0.000259	0.000229	0.000626	0.000732	0.00058	0.001068	0.000977	0.001083	0.000168	-7.6e-05	0	0.000641	0.00058	0.000717	0.001511	0.001404	0.001526	-4.6e-05	-0.000107	-0.000122	0.000824	0.000793	0.000748	0.001633	0.001556	0.001572		0.026398	0.026245	0.026398		0.000839	0.001144	0.001266		0.025436	0.025375	0.025421					-0.000687	-0.000717	-0.000626	0.00206
		568	0.000381	0.000275	0.00029	0.000641	0.000671	0.000671	0.001083	0.000946	0.001053	0.000107	-4.6e-05	4.6e-05	0.000641	0.000519	0.000763	0.001373	0.001419	0.001511	-4.6e-05	-0.000137	-0.000107	0.000793	0.000717	0.000778	0.001602	0.001602	0.001587		0.026001	0.025986	0.026062		0.000916	0.001083	0.001205		0.025177	0.025116	0.025116					-0.000778	-0.000687	-0.000702	0.001953
		569	0.000214	0.000183	0.000244	0.000534	0.000595	0.000443	0.000961	0.000931	0.000916	-0.000153	-0.000122	0	0.000565	0.000427	0.000671	0.001328	0.001312	0.001358	-0.000229	-0.000229	-0.000259	0.000793	0.000626	0.000671	0.001602	0.001495	0.001465		0.025558	0.025497	0.025574		0.000717	0.001022	0.001144		0.024826	0.02475	0.024765					-0.000854	-0.000732	-0.000793	0.001831
		570	0.000275	0.000214	0.000259	0.000519	0.000549	0.000534	0.000916	0.001083	0.000885	-4.6e-05	-9.2e-05	0	0.000549	0.000534	0.000656	0.001389	0.001312	0.001297	-0.000137	-0.000137	-0.000229	0.000854	0.000702	0.000687	0.001602	0.001556	0.001511		0.025162	0.025177	0.025314		0.000778	0.001083	0.001129		0.024536	0.024475	0.024551					-0.000809	-0.000687	-0.000763	0.001892
		571	0.000397	0.000259	0.000259	0.000565	0.000565	0.000534	0.000961	0.001038	0.0009	0	-6.1e-05	0	0.00058	0.000519	0.000534	0.001343	0.001312	0.001312	-4.6e-05	-6.1e-05	-0.000229	0.000809	0.000763	0.000641	0.001541	0.001541	0.001572		0.024933	0.024902	0.024963		0.000793	0.001114	0.00116		0.024323	0.024307	0.024292					-0.000656	-0.000717	-0.000656	0.001846
		572	0.000397	0.00029	0.000397	0.000671	0.000641	0.000565	0.001038	0.000992	0.000946	6.1e-05	6.1e-05	6.1e-05	0.000626	0.00058	0.00058	0.001434	0.001312	0.001404	-7.6e-05	-1.5e-05	-0.000168	0.000885	0.000778	0.000748	0.001617	0.001709	0.001633		0.024658	0.024597	0.024689		0.000793	0.001205	0.001236		0.024124	0.0242	0.024078					-0.00061	-0.000656	-0.000549	0.001968
		573	0.000366	0.00032	0.000351	0.00058	0.000549	0.000504	0.000961	0.000961	0.000839	1.5e-05	-9.2e-05	0	0.00061	0.000504	0.000504	0.001404	0.001236	0.001343	-0.000153	-0.000122	-0.000168	0.000793	0.000687	0.000687	0.001511	0.001541	0.001495		0.024353	0.024185	0.024231		0.000793	0.001175	0.00116		0.023682	0.023727	0.023682					-0.000687	-0.000702	-0.000717	0.001892
		574	0.000336	0.000336	0.000305	0.000473	0.000595	0.000504	0.000946	0.00087	0.000824	-4.6e-05	-9.2e-05	1.5e-05	0.000595	0.000473	0.000549	0.001297	0.001282	0.001343	-0.000153	-0.000183	-0.000198	0.000671	0.000595	0.000641	0.001419	0.001434	0.00145		0.024063	0.023834	0.023895		0.000824	0.001099	0.001175		0.023453	0.023483	0.023422					-0.000687	-0.000778	-0.000671	0.001846
		575	0.000427	0.000366	0.000366	0.00061	0.000671	0.000504	0.001007	0.000931	0.00087	0	6.1e-05	7.6e-05	0.000626	0.000488	0.000519	0.001358	0.001328	0.001389	-0.000153	-0.000198	-0.000122	0.000793	0.000656	0.000687	0.001434	0.001465	0.00145		0.023697	0.023621	0.023621		0.000824	0.001068	0.001175		0.023254	0.023346	0.023178					-0.000641	-0.000809	-0.000687	0.001694
		576	0.000458	0.000259	0.00029	0.000656	0.000565	0.000488	0.000931	0.000961	0.000824	0	0	3.1e-05	0.000534	0.000488	0.00061	0.001282	0.001282	0.001266	-3.1e-05	-0.000153	-0.000122	0.000641	0.000687	0.000702	0.001495	0.001373	0.001419		0.023361	0.023346	0.023254		0.000763	0.001022	0.00116		0.022903	0.022919	0.022919					-0.000702	-0.000809	-0.000641	0.001663
		577	0.000397	0.000412	0.000275	0.000595	0.000656	0.000595	0.000885	0.000809	0.0009	0.000122	1.5e-05	3.1e-05	0.000641	0.000488	0.000702	0.001328	0.001297	0.001297	-3.1e-05	-0.000107	-0.000107	0.00061	0.000671	0.000763	0.00148	0.00145	0.00148		0.023071	0.022995	0.023056		0.000748	0.001083	0.00119		0.02272	0.022675	0.022659					-0.000641	-0.000732	-0.00061	0.001709
		578	0.000305	0.000397	0.000397	0.000641	0.00058	0.000519	0.000809	0.000824	0.000885	0.000153	0	9.2e-05	0.000565	0.000549	0.000549	0.001266	0.001297	0.001266	-0.000107	-7.6e-05	-0.000137	0.000641	0.000671	0.000687	0.001434	0.00148	0.001495		0.022751	0.022598	0.022842		0.000824	0.001083	0.001205		0.022446	0.022369	0.022537					-0.000641	-0.00061	-0.000656	0.001556
		579	0.000336	0.000336	0.000412	0.000443	0.000504	0.000397	0.000824	0.000778	0.000885	0.000137	-1.5e-05	-1.5e-05	0.000443	0.000458	0.000519	0.001205	0.001221	0.00119	-0.000183	-0.000137	-0.000183	0.000641	0.000671	0.00058	0.001419	0.00145	0.00145		0.0224	0.022263	0.022415		0.000854	0.001083	0.001205		0.02211	0.02211	0.022263					-0.000671	-0.000656	-0.000702	0.001541
		580	0.000305	0.000427	0.000351	0.000443	0.000488	0.000458	0.000854	0.000778	0.0009	1.5e-05	-1.5e-05	0	0.000443	0.000412	0.000458	0.001205	0.00116	0.001236	-0.000137	-0.000214	-0.000122	0.000656	0.000656	0.00058	0.001328	0.001419	0.001373		0.022141	0.021973	0.022079		0.000885	0.001007	0.00116		0.021927	0.021927	0.021988					-0.000732	-0.000687	-0.000717	0.00148
		581	0.000366	0.000381	0.000397	0.000534	0.000549	0.000549	0.000824	0.000793	0.000839	-3.1e-05	4.6e-05	6.1e-05	0.000458	0.000473	0.000519	0.001297	0.00116	0.001221	-0.000153	-0.000214	-4.6e-05	0.000687	0.000671	0.000656	0.001328	0.001373	0.001373		0.02179	0.021744	0.02182		0.000748	0.001114	0.00116		0.021713	0.021713	0.021667					-0.00061	-0.000671	-0.000595	0.001526
		582	0.000305	0.000427	0.000427	0.000488	0.000595	0.000534	0.00087	0.000748	0.000778	4.6e-05	0.000122	7.6e-05	0.000488	0.000504	0.000519	0.00116	0.001129	0.001221	-0.000168	-0.000198	-0.000137	0.00061	0.000626	0.000671	0.001404	0.001312	0.001328		0.021454	0.021454	0.021545		0.000778	0.001144	0.001068		0.021454	0.021576	0.021393					-0.00058	-0.000671	-0.000595	0.001465
		583	0.000275	0.000366	0.000275	0.000351	0.000412	0.000381	0.000763	0.000595	0.000656	-1.5e-05	-6.1e-05	-1.5e-05	0.000443	0.000351	0.000366	0.001038	0.000977	0.001038	-0.000198	-0.000259	-0.000244	0.000473	0.000473	0.000519	0.001236	0.001221	0.001144		0.021072	0.021027	0.021164		0.000717	0.000961	0.000916		0.021194	0.021103	0.021072					-0.00061	-0.000763	-0.000702	0.001312
		584	0.000336	0.000397	0.000259	0.000427	0.000336	0.000397	0.000671	0.000549	0.000671	0	-0.000107	-1.5e-05	0.000412	0.000381	0.000366	0.001083	0.001068	0.001083	-0.000168	-0.000259	-0.000214	0.00058	0.000565	0.000641	0.00119	0.001221	0.001221		0.020874	0.020752	0.020889		0.000717	0.000916	0.001007		0.020935	0.020813	0.020905					-0.000763	-0.000702	-0.000671	0.001266
		585	0.00032	0.000458	0.000244	0.000443	0.000427	0.000412	0.000656	0.000671	0.000671	0	-1.5e-05	-0.000107	0.000412	0.000397	0.000366	0.001175	0.000916	0.001083	-0.000214	-0.000244	-0.000244	0.00061	0.00058	0.000534	0.00116	0.001205	0.001266		0.020538	0.020477	0.02063		0.000671	0.000916	0.000992		0.020615	0.020676	0.020615					-0.000656	-0.000656	-0.000717	0.001266
		586	0.000336	0.000381	0.000229	0.000412	0.000427	0.000443	0.000595	0.00058	0.000504	-4.6e-05	-1.5e-05	-6.1e-05	0.000336	0.00029	0.000397	0.001312	0.000961	0.001083	-0.000168	-0.000244	-0.000137	0.000473	0.000504	0.000534	0.00116	0.001205	0.001175		0.020142	0.020157	0.020279		0.000671	0.00087	0.001007		0.02034	0.020477	0.020432					-0.000534	-0.000793	-0.000748	0.001175
		587	0.000381	0.000366	0.000244	0.000473	0.000412	0.000366	0.00061	0.000534	0.000519	-4.6e-05	-0.000107	-4.6e-05	0.000244	0.00032	0.000336	0.00119	0.000946	0.001038	-0.000214	-0.000244	-0.000183	0.000381	0.000534	0.000443	0.001114	0.001144	0.001038		0.019852	0.019958	0.02002		0.000626	0.000839	0.000992		0.020081	0.020142	0.020096					-0.000626	-0.000793	-0.000778	0.00116
		588	0.000397	0.000381	0.000244	0.000366	0.000381	0.000305	0.000595	0.00058	0.00058	-6.1e-05	-0.000168	4.6e-05	0.00032	0.000443	0.00032	0.001053	0.000946	0.001007	-0.000153	-0.000259	-0.000275	0.000504	0.000549	0.000534	0.001144	0.001175	0.001099		0.019699	0.019699	0.019714		0.000656	0.000931	0.000977		0.019897	0.019928	0.019821					-0.00061	-0.000717	-0.000748	0.001236
		589	0.00032	0.000351	0.000275	0.000488	0.000351	0.000412	0.000656	0.000656	0.000549	-3.1e-05	-9.2e-05	-3.1e-05	0.000366	0.000305	0.000305	0.001038	0.000992	0.000977	-0.000229	-0.000259	-0.000229	0.000626	0.000473	0.000549	0.00119	0.001175	0.001083		0.01947	0.019348	0.019394		0.000671	0.000916	0.000977		0.019684	0.019714	0.019775					-0.00061	-0.000687	-0.000717	0.001328
		590	0.000275	0.000366	0.000244	0.000443	0.000397	0.000381	0.000549	0.000534	0.000488	-4.6e-05	-6.1e-05	-6.1e-05	0.000381	0.000336	0.000336	0.000961	0.001038	0.000931	-0.000259	-0.00032	-0.000229	0.000458	0.000458	0.000412	0.00116	0.00116	0.001038		0.01915	0.019104	0.019196		0.000534	0.000824	0.001022		0.01944	0.019485	0.019501					-0.000519	-0.000732	-0.000702	0.00119
		591	0.000366	0.000366	0.000336	0.000458	0.000397	0.000275	0.000534	0.000565	0.000519	-4.6e-05	0	-0.000122	0.000397	0.000275	0.00029	0.000931	0.000885	0.000885	-0.000198	-0.00032	-0.000305	0.000549	0.000488	0.000443	0.001099	0.001205	0.001114		0.01889	0.01886	0.018906		0.000534	0.000854	0.000992		0.019257	0.019379	0.019272					-0.000641	-0.000748	-0.000748	0.001144
		592	0.000504	0.000397	0.00029	0.000443	0.000412	0.000305	0.000565	0.000565	0.00058	-3.1e-05	-6.1e-05	0	0.000427	0.00029	0.00029	0.000961	0.000931	0.000946	-0.000153	-0.000214	-0.000244	0.000565	0.000519	0.000504	0.001205	0.001205	0.001114		0.018692	0.018631	0.018646		0.000595	0.000885	0.000961		0.019028	0.019135	0.019104					-0.000732	-0.000671	-0.000717	0.001068
		593	0.000488	0.000458	0.00029	0.000381	0.000351	0.000336	0.00061	0.00058	0.000565	0	-1.5e-05	6.1e-05	0.000427	0.00032	0.000336	0.000961	0.000916	0.001038	-0.000153	-0.000137	-0.000229	0.000488	0.000473	0.000458	0.001068	0.001099	0.001083		0.018402	0.018326	0.018341		0.00061	0.000793	0.000916		0.018799	0.018784	0.018906					-0.000748	-0.000702	-0.000656	0.001114
		594	0.000244	0.00032	0.00032	0.000336	0.00032	0.000305	0.000458	0.000565	0.000534	0	-6.1e-05	-7.6e-05	0.000366	0.000275	0.000259	0.000824	0.000748	0.000961	-0.000259	-0.000214	-0.00032	0.000427	0.000412	0.000458	0.000977	0.001038	0.001099		0.018021	0.017975	0.018066		0.00058	0.000763	0.000977		0.018524	0.01857	0.018646					-0.000763	-0.000809	-0.000626	0.001053
		595	0.000244	0.000275	0.000351	0.00032	0.000305	0.000336	0.000458	0.000427	0.000519	-3.1e-05	-9.2e-05	-6.1e-05	0.000412	0.000229	0.000168	0.000824	0.000793	0.000946	-0.000229	-0.00029	-0.000351	0.000412	0.000412	0.000427	0.001083	0.001053	0.001068		0.017761	0.017731	0.017838		0.000549	0.000748	0.000946		0.018326	0.018341	0.018494					-0.000793	-0.000854	-0.000595	0.001022
		596	0.000214	0.000244	0.000244	0.000397	0.00029	0.00032	0.000443	0.000381	0.000488	-3.1e-05	-6.1e-05	-3.1e-05	0.000366	0.000137	0.000153	0.000824	0.000839	0.000885	-0.000244	-0.000366	-0.000305	0.000351	0.000443	0.00029	0.001038	0.001053	0.001022		0.017532	0.017532	0.017563		0.000473	0.000824	0.000748		0.018066	0.018097	0.018112					-0.000717	-0.000763	-0.000824	0.000961
		597	0.000198	0.000229	0.00029	0.000244	0.000305	0.000336	0.000443	0.000351	0.000366	-7.6e-05	-4.6e-05	-1.5e-05	0.000519	0.000198	0.000137	0.0009	0.000809	0.000854	-0.000229	-0.000336	-0.000305	0.000336	0.000443	0.000336	0.000946	0.000992	0.000931		0.017303	0.017242	0.017426		0.000488	0.000839	0.000793		0.017853	0.017868	0.017975					-0.000732	-0.000717	-0.000748	0.0009
		598	0.000275	0.000275	0.000381	0.00029	0.000397	0.00029	0.000504	0.000397	0.000412	-4.6e-05	0	0	0.000443	0.00029	0.000259	0.000946	0.000946	0.000793	-0.000153	-0.000275	-0.000366	0.000397	0.000473	0.000336	0.001038	0.000992	0.0009		0.017044	0.017044	0.017166		0.000534	0.000793	0.000885		0.017715	0.017761	0.017761					-0.000702	-0.000702	-0.000702	0.000854
		599	0.00032	0.000229	0.000412	0.00032	0.000397	0.000381	0.000458	0.000458	0.000443	-1.5e-05	0	0	0.000366	0.000214	0.000244	0.000839	0.000793	0.000839	-0.000214	-0.000214	-0.00029	0.000412	0.000443	0.000366	0.001007	0.001038	0.001038		0.016754	0.016861	0.016907		0.000565	0.000809	0.000916		0.017563	0.017548	0.017639					-0.000595	-0.000687	-0.000687	0.000946
		600	0.000259	0.000244	0.000229	0.000336	0.000259	0.000305	0.000412	0.000366	0.000366	-9.2e-05	-7.6e-05	-6.1e-05	0.000214	0.000137	0.000168	0.000809	0.000732	0.000702	-0.000351	-0.00029	-0.000351	0.000366	0.000488	0.00029	0.000946	0.000961	0.000992		0.01651	0.01651	0.016586		0.000488	0.000732	0.000854		0.017288	0.017227	0.017349					-0.000702	-0.000793	-0.000717	0.000824
[truncated: 32 more columns]

## Sheet: EGCG autoxidation
Wavelength nm.	0h	0h	0h	24h	24h	24h	48h	48h	48h	72h	72h	72h	96h	96h	96h	120h	120h	120h
240	0.35463	0.35379	0.353287	0.413132	0.411789	0.411652	0.450394	0.450089	0.450089	0.47995	0.480301	0.48056	0.474899	0.474945	0.475006	0.472092	0.472717	0.472855
241	0.322937	0.322418	0.321838	0.399246	0.398209	0.397766	0.44075	0.440399	0.440475	0.470459	0.470993	0.471283	0.467209	0.467056	0.467072	0.465561	0.465881	0.465805
242	0.293961	0.293243	0.293076	0.387146	0.385971	0.385712	0.431961	0.431702	0.431778	0.46228	0.463028	0.462936	0.460175	0.460175	0.46022	0.459137	0.459366	0.459213
243	0.266388	0.266098	0.266037	0.375992	0.375046	0.374573	0.42421	0.424011	0.423965	0.454865	0.455093	0.455383	0.453842	0.453476	0.453598	0.453125	0.453201	0.453156
244	0.241699	0.241501	0.24176	0.366287	0.365555	0.364944	0.417526	0.417404	0.417358	0.447968	0.448288	0.448685	0.447739	0.447784	0.447632	0.447891	0.447861	0.448013
245	0.220459	0.220215	0.220612	0.358231	0.357376	0.356857	0.411865	0.411819	0.411682	0.441895	0.442322	0.442673	0.442596	0.442612	0.442429	0.443054	0.44339	0.44339
246	0.202667	0.202606	0.203049	0.351624	0.350754	0.350769	0.407288	0.407227	0.407043	0.436859	0.437317	0.437622	0.438324	0.438293	0.438156	0.439072	0.439117	0.439316
247	0.187912	0.188049	0.188202	0.346527	0.345627	0.345703	0.403488	0.403442	0.403595	0.432663	0.432968	0.433365	0.434219	0.434479	0.434402	0.435532	0.435623	0.435852
248	0.175858	0.176071	0.176025	0.342667	0.341675	0.341919	0.400726	0.400665	0.400696	0.428909	0.429214	0.429642	0.431381	0.431274	0.431229	0.432693	0.432648	0.432709
249	0.166473	0.166687	0.16684	0.340042	0.339172	0.339645	0.398834	0.398987	0.398941	0.426163	0.426422	0.426849	0.428787	0.42865	0.42868	0.429932	0.429901	0.430313
250	0.159897	0.160217	0.16037	0.338821	0.338013	0.338196	0.397858	0.397903	0.397903	0.424271	0.424988	0.424866	0.426468	0.426407	0.42659	0.427597	0.427704	0.427933
251	0.155502	0.155777	0.156174	0.338333	0.337585	0.33786	0.397644	0.397964	0.397781	0.422913	0.423447	0.423676	0.424927	0.424774	0.425003	0.426041	0.426208	0.426132
252	0.153336	0.153748	0.15416	0.338776	0.338181	0.338669	0.398224	0.398422	0.398254	0.422134	0.422638	0.422745	0.424225	0.42395	0.424072	0.424957	0.424973	0.425156
253	0.153244	0.153748	0.154099	0.340347	0.339417	0.339676	0.398941	0.399109	0.398941	0.421951	0.422409	0.422607	0.423431	0.423141	0.423462	0.424164	0.424164	0.424515
254	0.154663	0.154907	0.155426	0.341858	0.340942	0.341156	0.399963	0.399994	0.399918	0.4216	0.422089	0.422195	0.422729	0.422897	0.423157	0.423401	0.423355	0.423401
255	0.157394	0.157852	0.158371	0.343658	0.34288	0.343063	0.400848	0.400848	0.400925	0.421295	0.421738	0.421997	0.42247	0.422424	0.422333	0.422562	0.422684	0.422989
256	0.161179	0.161911	0.162476	0.345535	0.345032	0.345322	0.401642	0.401642	0.401718	0.421127	0.42157	0.421677	0.421783	0.421875	0.42189	0.421951	0.422119	0.422241
257	0.166199	0.167007	0.167725	0.34819	0.347382	0.347458	0.402496	0.40271	0.402603	0.421173	0.421295	0.42189	0.42128	0.421326	0.421356	0.421036	0.420959	0.421356
258	0.171768	0.172516	0.173294	0.35051	0.349747	0.349838	0.403519	0.40358	0.403748	0.420975	0.421295	0.421539	0.420547	0.420593	0.420441	0.419876	0.419907	0.42038
259	0.17804	0.178925	0.179077	0.353058	0.352112	0.352173	0.40451	0.40448	0.404831	0.421158	0.42157	0.421906	0.419754	0.4198	0.419708	0.41893	0.418808	0.419159
260	0.18483	0.185684	0.185852	0.35556	0.354706	0.354767	0.405701	0.405807	0.406021	0.421478	0.421844	0.422302	0.419449	0.419342	0.419586	0.417572	0.417908	0.417816
261	0.192108	0.19281	0.193283	0.357925	0.357346	0.357544	0.406998	0.406998	0.407043	0.421692	0.421967	0.422729	0.418701	0.418823	0.419067	0.416473	0.416718	0.416428
262	0.19957	0.200623	0.200867	0.360306	0.359726	0.359894	0.408218	0.408112	0.408157	0.422058	0.422394	0.422684	0.417786	0.417999	0.417908	0.41507	0.414978	0.415115
263	0.207169	0.208298	0.208511	0.362411	0.361969	0.362152	0.408997	0.408997	0.408997	0.422638	0.423004	0.423462	0.416992	0.417068	0.417404	0.413605	0.413437	0.413879
264	0.214706	0.215652	0.215973	0.363998	0.363708	0.363663	0.409332	0.409515	0.40947	0.42247	0.423248	0.42337	0.416245	0.416153	0.416229	0.411972	0.411942	0.412018
265	0.221878	0.222672	0.223297	0.365036	0.364761	0.364731	0.409317	0.409225	0.409515	0.422592	0.42305	0.423157	0.415237	0.415283	0.415375	0.40976	0.41011	0.410416
266	0.229355	0.229904	0.230774	0.365784	0.365341	0.365402	0.408951	0.409454	0.409134	0.422073	0.422012	0.422562	0.413879	0.414185	0.413727	0.40773	0.408264	0.408081
267	0.236099	0.236832	0.23764	0.366211	0.365448	0.365601	0.408188	0.408264	0.408218	0.421066	0.421555	0.421616	0.412125	0.412399	0.412125	0.405762	0.406143	0.406082
268	0.243042	0.243759	0.244492	0.365845	0.36528	0.365524	0.406357	0.406738	0.406662	0.419495	0.419708	0.420288	0.409958	0.409943	0.409882	0.403076	0.403	0.403564
269	0.248764	0.249741	0.250473	0.364685	0.364136	0.364395	0.404114	0.404861	0.404709	0.41774	0.418274	0.41864	0.407532	0.407486	0.407471	0.400146	0.400131	0.400497
270	0.253387	0.254333	0.255112	0.363495	0.36293	0.363007	0.402283	0.402313	0.402557	0.415756	0.416153	0.416504	0.404785	0.404831	0.404892	0.397186	0.397522	0.397324
271	0.257431	0.25798	0.258636	0.361664	0.361023	0.361511	0.399567	0.399841	0.399979	0.413391	0.413574	0.414154	0.401657	0.401596	0.40181	0.393936	0.394272	0.394485
272	0.259995	0.260529	0.261505	0.359528	0.358871	0.359283	0.396957	0.397064	0.397141	0.410812	0.411179	0.411545	0.399124	0.39888	0.399033	0.390564	0.390945	0.391068
273	0.261887	0.262726	0.263565	0.35733	0.35675	0.357101	0.394211	0.394272	0.394363	0.408401	0.408691	0.408966	0.396317	0.396057	0.396317	0.387802	0.387909	0.387756
274	0.262756	0.263809	0.26442	0.354858	0.354538	0.354599	0.390915	0.391266	0.391586	0.405609	0.406067	0.406723	0.39328	0.393463	0.393478	0.384369	0.384552	0.384735
275	0.263077	0.264221	0.264969	0.352158	0.351669	0.352066	0.387726	0.38826	0.388229	0.402924	0.403275	0.403946	0.390289	0.390137	0.390503	0.380859	0.381104	0.381058
276	0.262939	0.263901	0.264648	0.349228	0.348648	0.348953	0.384552	0.38472	0.384476	0.399719	0.400253	0.400742	0.386902	0.386993	0.387329	0.377548	0.37793	0.378204
277	0.262543	0.263504	0.264343	0.346024	0.345566	0.34613	0.380569	0.380966	0.380722	0.396362	0.396667	0.397141	0.383545	0.383652	0.383896	0.374405	0.374466	0.375198
278	0.261734	0.262787	0.263565	0.34256	0.341949	0.342239	0.376755	0.376801	0.377243	0.392792	0.393005	0.393707	0.380096	0.380264	0.380157	0.37088	0.370697	0.371048
279	0.259705	0.261002	0.261383	0.338654	0.338074	0.338242	0.37204	0.372116	0.372711	0.388519	0.38887	0.389175	0.375977	0.376099	0.375824	0.366959	0.36673	0.366943
280	0.255844	0.257156	0.25769	0.334061	0.333633	0.333786	0.36705	0.366898	0.367111	0.383652	0.384033	0.384262	0.371246	0.371643	0.371613	0.362549	0.362686	0.362946
281	0.250992	0.251984	0.252731	0.328827	0.32814	0.328659	0.361618	0.361603	0.361893	0.378693	0.379028	0.379395	0.366577	0.366852	0.366531	0.357925	0.358047	0.358475
282	0.245804	0.246582	0.247421	0.323624	0.322708	0.323273	0.355942	0.356308	0.356201	0.373062	0.37384	0.374023	0.36145	0.361649	0.361649	0.353195	0.35347	0.353302
283	0.240387	0.241257	0.24205	0.317749	0.317307	0.317596	0.350433	0.35083	0.350739	0.367523	0.367859	0.368179	0.355957	0.356415	0.356308	0.348068	0.348633	0.348618
284	0.235687	0.236649	0.237152	0.312576	0.311752	0.311981	0.344711	0.345047	0.345108	0.361893	0.362106	0.362442	0.351044	0.350815	0.351212	0.342896	0.343369	0.343307
285	0.231537	0.232178	0.232788	0.307159	0.306137	0.30687	0.339142	0.339386	0.339005	0.3564	0.356796	0.357117	0.345963	0.345825	0.346191	0.337463	0.337906	0.338074
286	0.227478	0.228012	0.228882	0.301773	0.300964	0.301208	0.333481	0.333313	0.333252	0.350739	0.351593	0.351669	0.34053	0.340637	0.34079	0.332458	0.332703	0.333008
287	0.223892	0.224823	0.225403	0.296158	0.295639	0.295792	0.327942	0.328247	0.328217	0.345566	0.346024	0.346252	0.335327	0.335403	0.335373	0.32756	0.327911	0.328156
288	0.220901	0.221741	0.222168	0.291122	0.290558	0.290787	0.322357	0.322891	0.32312	0.340332	0.340805	0.341034	0.329987	0.330353	0.33046	0.322571	0.323212	0.323151
289	0.217911	0.21846	0.219086	0.286041	0.285095	0.285599	0.317337	0.317734	0.317566	0.33522	0.335571	0.335617	0.325439	0.325546	0.325317	0.318024	0.318268	0.318527
290	0.214722	0.215607	0.215927	0.280975	0.280212	0.280167	0.312439	0.312347	0.312302	0.330521	0.330673	0.331146	0.320908	0.320984	0.321106	0.313431	0.314163	0.314133
291	0.212036	0.212784	0.213089	0.276047	0.275208	0.275482	0.307312	0.307281	0.307663	0.325485	0.325943	0.326447	0.316498	0.316635	0.317017	0.30928	0.309753	0.309784
292	0.209335	0.209915	0.210205	0.271362	0.270508	0.270767	0.30249	0.302322	0.302383	0.320755	0.32132	0.321915	0.311798	0.31189	0.312454	0.305328	0.305725	0.305832
293	0.206787	0.207123	0.207626	0.266342	0.265457	0.265305	0.297287	0.297638	0.297394	0.315781	0.316788	0.317032	0.307419	0.307648	0.307587	0.301132	0.3013	0.301712
294	0.2043	0.204453	0.205002	0.261292	0.260391	0.260468	0.292435	0.292847	0.292664	0.311722	0.312393	0.312363	0.303391	0.303329	0.303375	0.297302	0.297714	0.297455
295	0.201035	0.201569	0.201691	0.255646	0.254776	0.255249	0.287445	0.287338	0.28743	0.306885	0.307556	0.307663	0.299271	0.299042	0.299133	0.293457	0.293503	0.29364
296	0.198761	0.199249	0.199371	0.250992	0.250259	0.250412	0.2827	0.282349	0.282806	0.302444	0.303177	0.303436	0.295441	0.295258	0.29538	0.289749	0.289795	0.289917
297	0.196396	0.196533	0.197128	0.246445	0.24556	0.245667	0.277649	0.27771	0.278	0.298187	0.298828	0.298874	0.291611	0.291672	0.291718	0.285934	0.286224	0.286179
298	0.194153	0.194427	0.194839	0.241959	0.240738	0.24115	0.272919	0.273026	0.273132	0.294052	0.294571	0.29509	0.288101	0.287872	0.28801	0.282822	0.282898	0.282928
299	0.191818	0.192184	0.19252	0.237076	0.235962	0.236099	0.268097	0.268356	0.268509	0.289841	0.290436	0.290573	0.284256	0.28421	0.284164	0.279205	0.27919	0.279358
300	0.189499	0.189804	0.189987	0.231918	0.230972	0.231155	0.263321	0.263504	0.263626	0.285614	0.286072	0.286469	0.280609	0.280441	0.280777	0.275787	0.276016	0.276123
301	0.187332	0.187408	0.187332	0.226776	0.226074	0.226425	0.258759	0.258865	0.258881	0.281403	0.281921	0.282257	0.276794	0.276764	0.277023	0.272324	0.272552	0.272415
302	0.18512	0.184967	0.185013	0.222046	0.221252	0.2211	0.253769	0.253891	0.253998	0.277191	0.27739	0.277771	0.272751	0.272675	0.273193	0.268936	0.269073	0.269348
303	0.18277	0.182632	0.182663	0.217041	0.216171	0.216248	0.2491	0.248932	0.248978	0.272766	0.272934	0.273331	0.269196	0.268997	0.269287	0.265533	0.265686	0.265701
304	0.180435	0.180603	0.180481	0.211975	0.211395	0.211609	0.244278	0.244339	0.244415	0.268326	0.26886	0.268799	0.265427	0.265549	0.265518	0.262238	0.262329	0.262512
305	0.178238	0.178116	0.177948	0.207504	0.206329	0.20668	0.23938	0.239624	0.239456	0.264053	0.264481	0.264297	0.26181	0.261826	0.26207	0.258865	0.259018	0.259338
306	0.176788	0.176208	0.175934	0.203354	0.202545	0.202576	0.23497	0.235001	0.235107	0.260498	0.260818	0.261276	0.258667	0.25856	0.258499	0.255402	0.255661	0.256042
307	0.174484	0.174088	0.174026	0.198746	0.198318	0.197845	0.230225	0.230087	0.230133	0.256271	0.256363	0.25679	0.254456	0.254684	0.254517	0.252213	0.252182	0.252228
308	0.172638	0.172256	0.17218	0.194168	0.193665	0.193436	0.225418	0.225647	0.225967	0.251923	0.252335	0.25264	0.250931	0.251114	0.251053	0.248932	0.249069	0.249115
309	0.170593	0.17009	0.170013	0.190079	0.189392	0.18927	0.221329	0.221451	0.221649	0.247604	0.248001	0.248322	0.247818	0.248093	0.247955	0.24614	0.246124	0.245789
310	0.168991	0.168121	0.167526	0.185822	0.185211	0.18515	0.217499	0.217575	0.217545	0.244171	0.244217	0.2444	0.244186	0.244431	0.244354	0.243057	0.243134	0.242905
311	0.167267	0.166397	0.165833	0.181793	0.181	0.181183	0.213455	0.213089	0.213394	0.239792	0.240036	0.240173	0.240662	0.240631	0.240616	0.240067	0.23999	0.240219
312	0.165741	0.165024	0.16449	0.178146	0.177658	0.17746	0.209305	0.209305	0.209244	0.236237	0.236206	0.236343	0.237442	0.237579	0.237946	0.237015	0.23703	0.237015
313	0.164063	0.163269	0.162888	0.174667	0.17421	0.173828	0.205826	0.205231	0.205368	0.232666	0.232483	0.232941	0.23436	0.234573	0.234909	0.234024	0.234055	0.23378
314	0.16272	0.161865	0.161148	0.17128	0.170746	0.170609	0.201828	0.201569	0.202011	0.228683	0.229019	0.229111	0.231232	0.231216	0.231735	0.231506	0.231415	0.231201
315	0.161621	0.16069	0.159561	0.16803	0.167526	0.167618	0.198425	0.198425	0.198532	0.225357	0.225311	0.225906	0.228714	0.22821	0.228806	0.228653	0.228729	0.228867
316	0.160461	0.159225	0.158478	0.165039	0.164337	0.164413	0.195297	0.195343	0.195496	0.222076	0.222519	0.222549	0.225647	0.225983	0.225662	0.226242	0.225876	0.226532
317	0.159286	0.157806	0.15712	0.162201	0.161514	0.161362	0.192062	0.19191	0.191788	0.219421	0.219864	0.219803	0.222839	0.222916	0.2229	0.223434	0.223053	0.223495
318	0.157501	0.156372	0.155853	0.159241	0.158844	0.158493	0.188873	0.188736	0.189194	0.216187	0.216232	0.216476	0.220306	0.220276	0.220139	0.221054	0.220779	0.221161
319	0.156265	0.155182	0.15451	0.156494	0.155792	0.155792	0.185623	0.18576	0.185516	0.212662	0.212677	0.213242	0.217239	0.217484	0.217499	0.218628	0.218445	0.218765
320	0.154648	0.153854	0.152756	0.153976	0.15329	0.153091	0.182755	0.182877	0.18277	0.209595	0.210327	0.210251	0.214798	0.215012	0.215057	0.216278	0.216064	0.216385
321	0.153046	0.152084	0.150909	0.151764	0.150955	0.150452	0.180008	0.179962	0.180099	0.207718	0.207397	0.207901	0.212448	0.212616	0.212479	0.213959	0.214203	0.21431
322	0.151688	0.150772	0.149734	0.149277	0.148758	0.148392	0.177505	0.176987	0.177383	0.204926	0.205139	0.205658	0.210464	0.210312	0.21022	0.211578	0.212006	0.212326
323	0.150009	0.149063	0.147842	0.147034	0.146545	0.146454	0.175232	0.175125	0.17511	0.202454	0.20282	0.203079	0.208191	0.208267	0.208115	0.209427	0.210007	0.21048
324	0.147934	0.146851	0.14592	0.144897	0.144073	0.14418	0.172806	0.173141	0.17305	0.200424	0.200562	0.200867	0.205658	0.20578	0.206253	0.207535	0.20784	0.208176
325	0.145966	0.144501	0.143982	0.14267	0.142273	0.142258	0.170929	0.171005	0.170944	0.1978	0.19838	0.198181	0.20401	0.203842	0.203949	0.205795	0.206299	0.206268
326	0.143738	0.142059	0.141586	0.140488	0.140015	0.139832	0.16864	0.168533	0.168411	0.195496	0.196106	0.196152	0.20192	0.201996	0.202133	0.204132	0.204117	0.204575
327	0.140762	0.139771	0.139206	0.138672	0.138229	0.138016	0.166336	0.166519	0.166428	0.193741	0.19429	0.194275	0.19989	0.200302	0.200256	0.202454	0.202469	0.202637
328	0.137909	0.136948	0.136169	0.136459	0.135727	0.136063	0.164536	0.164139	0.164276	0.191666	0.192123	0.192169	0.19812	0.197769	0.197983	0.200623	0.200653	0.200546
329	0.135101	0.134018	0.133194	0.134537	0.133621	0.133438	0.162186	0.162079	0.162292	0.189316	0.190048	0.190277	0.196365	0.196289	0.196442	0.198853	0.198868	0.199173
330	0.131744	0.130585	0.129791	0.132462	0.131592	0.131332	0.160736	0.160721	0.160614	0.187592	0.187973	0.188919	0.194946	0.194855	0.194885	0.197052	0.197281	0.19754
331	0.128052	0.126678	0.12616	0.130188	0.129593	0.129425	0.158813	0.158646	0.158844	0.185959	0.186646	0.186707	0.192703	0.192886	0.193283	0.195175	0.195587	0.195679
332	0.123383	0.122955	0.122192	0.128067	0.127136	0.127426	0.156586	0.156723	0.156494	0.183701	0.184692	0.184616	0.190872	0.19101	0.191391	0.193405	0.193924	0.193832
333	0.119446	0.118973	0.118271	0.126434	0.125504	0.125595	0.154922	0.154739	0.154846	0.181915	0.182388	0.182693	0.189407	0.189392	0.189728	0.192078	0.192291	0.191895
334	0.115402	0.114517	0.113846	0.124313	0.123398	0.123108	0.153168	0.153122	0.15303	0.180405	0.181061	0.181061	0.188309	0.188156	0.188171	0.190628	0.190445	0.190735
335	0.111176	0.109818	0.109024	0.12146	0.120926	0.121078	0.151184	0.151154	0.151199	0.178314	0.178696	0.179153	0.186462	0.186005	0.185989	0.188919	0.189316	0.189209
336	0.106277	0.105576	0.104492	0.11972	0.118988	0.119141	0.149399	0.149033	0.149063	0.176559	0.177246	0.177094	0.185104	0.184509	0.184586	0.187271	0.188034	0.187927
337	0.101364	0.10051	0.099564	0.117523	0.117035	0.117249	0.14769	0.14769	0.147049	0.17514	0.175659	0.175995	0.1828	0.183197	0.183075	0.185669	0.185913	0.185791
338	0.096359	0.095657	0.094833	0.115387	0.114578	0.114273	0.146011	0.146286	0.146225	0.173645	0.173843	0.173965	0.181793	0.182159	0.182144	0.184235	0.184555	0.184479
339	0.091431	0.091095	0.090439	0.113022	0.112198	0.111984	0.144302	0.144363	0.144272	0.171982	0.172211	0.17244	0.17984	0.179703	0.180298	0.182861	0.183182	0.183121
340	0.088516	0.088104	0.08725	0.113327	0.11235	0.112152	0.144653	0.145081	0.144485	0.172592	0.172668	0.173187	0.180725	0.180588	0.181259	0.184601	0.184891	0.184494
341	0.081238	0.080368	0.079987	0.109268	0.108215	0.108032	0.141464	0.141479	0.141403	0.169327	0.169769	0.169724	0.178268	0.178543	0.178436	0.180466	0.180115	0.180252
342	0.07547	0.074142	0.07402	0.105774	0.104462	0.104874	0.138474	0.138321	0.138779	0.166382	0.16658	0.16658	0.175171	0.175674	0.175323	0.178116	0.178284	0.178116
343	0.070419	0.069473	0.069443	0.103775	0.102554	0.103027	0.136703	0.136658	0.136536	0.164536	0.164841	0.165512	0.174103	0.173782	0.173767	0.176239	0.176331	0.17627
344	0.064896	0.064346	0.064331	0.101257	0.100494	0.100616	0.134399	0.134659	0.134567	0.162567	0.162704	0.163223	0.172318	0.172272	0.17215	0.174835	0.174789	0.175232
345	0.060349	0.05954	0.05957	0.098969	0.098007	0.098068	0.132919	0.132843	0.133316	0.16153	0.161789	0.161255	0.171127	0.171066	0.170731	0.173279	0.173096	0.173264
346	0.055847	0.054993	0.054611	0.096634	0.09549	0.095764	0.130951	0.130966	0.130798	0.15979	0.159988	0.160309	0.169464	0.168839	0.169006	0.171646	0.171402	0.171692
347	0.050766	0.050766	0.050415	0.094833	0.093781	0.093613	0.129333	0.129227	0.129593	0.158127	0.158203	0.158691	0.167252	0.167206	0.166992	0.170273	0.169952	0.170135
348	0.046677	0.046417	0.046326	0.092392	0.09137	0.091507	0.127548	0.127335	0.127609	0.156113	0.156143	0.156601	0.165924	0.165771	0.165802	0.168777	0.168579	0.168808
349	0.042999	0.042404	0.042252	0.090164	0.089462	0.089645	0.125931	0.125977	0.125427	0.15451	0.154633	0.154984	0.164307	0.164093	0.16449	0.166763	0.166901	0.167099
350	0.039169	0.038574	0.038467	0.088364	0.087784	0.087326	0.124557	0.124146	0.123993	0.153183	0.152847	0.153183	0.162735	0.162506	0.162735	0.165237	0.165207	0.165573
351	0.035431	0.0354	0.034897	0.086182	0.085541	0.085434	0.122711	0.12265	0.122726	0.151413	0.151337	0.151581	0.161255	0.161224	0.161224	0.164368	0.163727	0.164001
352	0.031769	0.031937	0.031311	0.084167	0.083771	0.083328	0.12117	0.120804	0.120728	0.149704	0.149811	0.149796	0.159286	0.159576	0.159439	0.162354	0.16214	0.162262
353	0.028534	0.028702	0.028229	0.082367	0.082108	0.081497	0.119125	0.119263	0.119156	0.148102	0.148209	0.148071	0.157806	0.157867	0.157852	0.160446	0.160797	0.160355
354	0.02597	0.025848	0.025955	0.08017	0.079391	0.079865	0.117523	0.117691	0.117508	0.146057	0.146423	0.146286	0.156494	0.156113	0.156113	0.158875	0.15863	0.159058
355	0.023636	0.023041	0.023468	0.07869	0.077942	0.077988	0.115875	0.116089	0.115616	0.144409	0.144379	0.14476	0.154633	0.154068	0.154373	0.157059	0.157059	0.15744
356	0.021286	0.020966	0.020859	0.077148	0.076431	0.076431	0.114349	0.114502	0.114426	0.142776	0.143036	0.143524	0.152893	0.152725	0.153046	0.155579	0.15535	0.155685
357	0.018768	0.018692	0.018494	0.075134	0.074524	0.074524	0.112915	0.112991	0.112885	0.141235	0.141174	0.140976	0.151596	0.151672	0.151611	0.153915	0.154556	0.154114
358	0.016556	0.016724	0.016434	0.073959	0.073425	0.072922	0.111359	0.111206	0.11142	0.139771	0.13974	0.139603	0.149582	0.149826	0.149994	0.152756	0.152527	0.151978
359	0.015182	0.015259	0.014938	0.072449	0.071396	0.071457	0.10994	0.109894	0.109772	0.13768	0.137848	0.137848	0.148636	0.148514	0.148422	0.151276	0.15062	0.15097
360	0.013443	0.013504	0.013336	0.070694	0.070145	0.070358	0.108322	0.108688	0.108551	0.135849	0.136063	0.136353	0.146805	0.146667	0.146667	0.14975	0.149628	0.149582
361	0.012009	0.012238	0.011841	0.069153	0.068939	0.06871	0.106842	0.107162	0.107117	0.134247	0.134338	0.134659	0.144974	0.144943	0.14476	0.147491	0.147842	0.147949
362	0.010696	0.010742	0.011032	0.068207	0.067581	0.067612	0.105423	0.105301	0.105438	0.132935	0.133224	0.133179	0.1436	0.143402	0.143311	0.14566	0.145767	0.145889
363	0.009644	0.009705	0.009537	0.066818	0.065948	0.066422	0.104156	0.10408	0.10379	0.131531	0.131104	0.131668	0.142471	0.142334	0.141968	0.144714	0.144485	0.144348
364	0.008133	0.008286	0.008636	0.065445	0.065033	0.065186	0.102692	0.10289	0.10257	0.129776	0.129868	0.129761	0.140457	0.140289	0.14003	0.142792	0.142456	0.142776
365	0.007248	0.007462	0.007462	0.064087	0.063339	0.063568	0.101593	0.101303	0.101288	0.128052	0.128128	0.128113	0.13884	0.138779	0.138535	0.141068	0.140884	0.141037
366	0.006622	0.006897	0.006561	0.063065	0.062012	0.062149	0.100067	0.099838	0.099838	0.126144	0.126709	0.12648	0.137222	0.136993	0.136902	0.139221	0.139343	0.139328
367	0.006226	0.006378	0.006027	0.061768	0.061279	0.061188	0.098358	0.098648	0.09848	0.124725	0.125046	0.125122	0.135559	0.135635	0.135452	0.138092	0.138229	0.138107
368	0.005341	0.005386	0.005371	0.060959	0.060196	0.060303	0.097275	0.097275	0.097275	0.123337	0.123505	0.123688	0.133682	0.133896	0.133545	0.136002	0.136459	0.136398
369	0.004852	0.004761	0.004761	0.059677	0.058914	0.058945	0.095749	0.095749	0.095505	0.12178	0.122025	0.121948	0.132248	0.132156	0.132233	0.134506	0.134552	0.134628
370	0.00444	0.004456	0.00444	0.058624	0.058105	0.057983	0.094498	0.094635	0.094223	0.120361	0.120499	0.120239	0.130402	0.130051	0.130463	0.132675	0.132507	0.133133
371	0.004089	0.004044	0.004211	0.057419	0.05687	0.056931	0.093063	0.093185	0.093079	0.118698	0.118896	0.118851	0.129044	0.128967	0.128845	0.131195	0.130981	0.131195
372	0.003845	0.003815	0.003815	0.056564	0.056091	0.055954	0.092056	0.091949	0.091919	0.116837	0.117096	0.117111	0.127121	0.127594	0.127426	0.129471	0.129257	0.12941
373	0.003693	0.003433	0.003494	0.055786	0.055206	0.055008	0.090607	0.090775	0.090714	0.11554	0.115204	0.115692	0.125702	0.125687	0.125534	0.127777	0.127808	0.127777
374	0.003265	0.003311	0.003159	0.054947	0.054443	0.054153	0.089432	0.089127	0.089203	0.113846	0.114136	0.114105	0.124222	0.124359	0.124023	0.125961	0.125854	0.126205
375	0.002899	0.002914	0.002914	0.053741	0.053146	0.05304	0.087967	0.087952	0.087982	0.112335	0.112595	0.112778	0.122696	0.12265	0.122665	0.124298	0.124649	0.124557
376	0.00296	0.003021	0.003021	0.052734	0.052063	0.052261	0.086685	0.086792	0.087067	0.110977	0.110916	0.11116	0.12088	0.120682	0.120834	0.123093	0.122757	0.123047
377	0.002625	0.002777	0.00264	0.051651	0.051056	0.051041	0.085632	0.085556	0.085632	0.109161	0.109314	0.109558	0.119308	0.11908	0.119171	0.121109	0.121201	0.121094
378	0.002655	0.002228	0.00238	0.05072	0.050095	0.050034	0.084274	0.084167	0.084198	0.107635	0.107742	0.107956	0.117554	0.117508	0.117477	0.119385	0.119217	0.119431
379	0.002533	0.002304	0.002228	0.050003	0.049454	0.04921	0.082977	0.082947	0.08287	0.105835	0.106186	0.106308	0.115692	0.115814	0.115738	0.117462	0.11731	0.117569
380	0.00235	0.002258	0.002304	0.049026	0.048401	0.048126	0.081467	0.081604	0.081573	0.104462	0.104568	0.104797	0.114288	0.114029	0.11412	0.115768	0.115891	0.115799
381	0.002243	0.002396	0.002258	0.047989	0.047424	0.047318	0.080322	0.0802	0.080399	0.102829	0.102814	0.102905	0.112473	0.112579	0.112213	0.114227	0.114212	0.114273
382	0.00206	0.002136	0.001953	0.047256	0.046646	0.046814	0.079117	0.07901	0.078949	0.101089	0.101471	0.101349	0.110779	0.110641	0.110397	0.112228	0.112488	0.112625
383	0.002197	0.002167	0.002243	0.04628	0.045685	0.045776	0.077637	0.077515	0.077682	0.099457	0.099716	0.099777	0.109009	0.108902	0.108795	0.110565	0.110382	0.11058
384	0.002106	0.002258	0.002228	0.045532	0.044754	0.044739	0.076599	0.076599	0.076385	0.097946	0.098251	0.098297	0.107315	0.107483	0.107132	0.108841	0.108749	0.108887
385	0.001816	0.001999	0.00209	0.0448	0.044083	0.044144	0.0755	0.075317	0.075058	0.096542	0.096832	0.096985	0.105713	0.105621	0.105606	0.107224	0.107071	0.107025
386	0.002014	0.001968	0.002029	0.044083	0.043396	0.04332	0.074265	0.074219	0.074188	0.094864	0.095245	0.095291	0.104141	0.103882	0.104095	0.105362	0.105148	0.105255
387	0.001862	0.001816	0.001907	0.043137	0.042603	0.04248	0.07309	0.072784	0.072937	0.093445	0.093613	0.093979	0.102325	0.10228	0.102341	0.10379	0.103592	0.10379
388	0.001923	0.00174	0.001801	0.042664	0.041992	0.041779	0.071732	0.071655	0.071609	0.091965	0.091934	0.092239	0.100616	0.100662	0.100494	0.10199	0.101898	0.10228
389	0.001907	0.001755	0.001785	0.041626	0.04097	0.040833	0.070526	0.070389	0.070557	0.090668	0.090622	0.090881	0.09877	0.098953	0.098663	0.100082	0.10025	0.100342
390	0.001678	0.001755	0.001678	0.040939	0.040298	0.040344	0.069489	0.06926	0.06926	0.089005	0.089172	0.089371	0.09726	0.097275	0.097214	0.098694	0.098663	0.09874
391	0.001724	0.001831	0.001755	0.040146	0.039627	0.039734	0.068588	0.068344	0.06842	0.087692	0.087891	0.087845	0.09581	0.095718	0.095764	0.096741	0.096817	0.096848
392	0.001846	0.001785	0.001892	0.03949	0.038849	0.039032	0.067291	0.067368	0.067352	0.086334	0.086365	0.086487	0.094284	0.094162	0.094147	0.0952	0.095215	0.09523
393	0.001816	0.001617	0.00177	0.038773	0.038086	0.038223	0.066269	0.066208	0.066223	0.084747	0.084808	0.085037	0.092697	0.092697	0.092651	0.093567	0.093719	0.093735
394	0.001831	0.001648	0.001678	0.038177	0.037445	0.03743	0.065155	0.065262	0.065155	0.083435	0.083511	0.08374	0.09108	0.091003	0.091125	0.091904	0.09201	0.0923
395	0.001709	0.001633	0.001678	0.037628	0.037048	0.036972	0.064209	0.064255	0.064255	0.082047	0.082169	0.08223	0.089462	0.089478	0.089539	0.090439	0.090408	0.090683
396	0.001617	0.001709	0.001709	0.036972	0.036423	0.036224	0.0634	0.063309	0.063156	0.081009	0.081146	0.081024	0.08815	0.088135	0.088028	0.088943	0.088837	0.088943
397	0.001694	0.001663	0.001511	0.03653	0.035767	0.035721	0.062256	0.062134	0.062286	0.079666	0.079636	0.079819	0.086685	0.086792	0.086609	0.087326	0.087357	0.087402
398	0.001694	0.001633	0.001495	0.035797	0.035141	0.035141	0.061264	0.061249	0.061386	0.078461	0.078506	0.078629	0.08548	0.085342	0.085464	0.085892	0.085938	0.086075
399	0.001755	0.001587	0.001587	0.035461	0.034546	0.034668	0.060379	0.060425	0.060455	0.077286	0.077301	0.077377	0.084091	0.084137	0.084122	0.084717	0.084518	0.084976
400	0.001694	0.001602	0.001663	0.034866	0.034027	0.03418	0.059448	0.059402	0.059402	0.076141	0.07608	0.076111	0.082825	0.082794	0.082687	0.083328	0.083191	0.083374
401	0.001572	0.001633	0.001617	0.034317	0.03363	0.033707	0.058716	0.058884	0.058701	0.075043	0.07515	0.075134	0.081528	0.081497	0.081604	0.082001	0.081909	0.082138
402	0.001495	0.001587	0.001511	0.033554	0.032959	0.033096	0.0578	0.057785	0.057831	0.073944	0.074097	0.073944	0.080215	0.080032	0.080246	0.080597	0.080429	0.080566
403	0.001572	0.001526	0.001617	0.033127	0.032532	0.032578	0.057159	0.057068	0.057053	0.072815	0.073074	0.072937	0.079208	0.078888	0.079056	0.079514	0.079346	0.079346
404	0.001404	0.001617	0.001541	0.032791	0.032104	0.032166	0.05629	0.056259	0.056335	0.071854	0.071945	0.071869	0.077866	0.07782	0.077896	0.078186	0.078049	0.078262
405	0.001526	0.001465	0.001511	0.032303	0.03154	0.031631	0.055557	0.055557	0.055557	0.070816	0.070923	0.070999	0.076904	0.076706	0.076782	0.076904	0.07692	0.077072
406	0.001434	0.00145	0.001541	0.031921	0.031296	0.031235	0.054825	0.054733	0.054657	0.069794	0.069855	0.069962	0.075775	0.075623	0.075638	0.075714	0.075775	0.075882
407	0.001556	0.001511	0.001602	0.031448	0.030945	0.030884	0.054153	0.054001	0.054123	0.068848	0.068985	0.069046	0.074692	0.074478	0.074509	0.074677	0.074615	0.0746
408	0.001633	0.001541	0.001602	0.031021	0.030441	0.030457	0.05336	0.053421	0.053574	0.067825	0.067963	0.068008	0.073441	0.073349	0.073318	0.073547	0.07338	0.073593
409	0.00148	0.001572	0.001389	0.030655	0.03009	0.029999	0.052719	0.05275	0.052887	0.067047	0.067169	0.067169	0.072433	0.072418	0.072342	0.072281	0.072418	0.072311
410	0.001511	0.001587	0.001495	0.03038	0.029694	0.029724	0.052002	0.052002	0.052017	0.066132	0.06633	0.066193	0.071411	0.071396	0.071365	0.07135	0.071411	0.071335
411	0.001617	0.001633	0.001526	0.029953	0.029297	0.029358	0.051407	0.051285	0.051361	0.065308	0.06543	0.06546	0.070374	0.070313	0.070343	0.070374	0.070358	0.070328
412	0.001465	0.001511	0.00145	0.029617	0.029037	0.0289	0.05072	0.050644	0.050583	0.064529	0.06459	0.064667	0.069351	0.069321	0.069305	0.069305	0.069305	0.069397
413	0.00148	0.001389	0.001511	0.02916	0.028595	0.028519	0.050156	0.050095	0.050171	0.063599	0.063629	0.063751	0.068405	0.068344	0.068451	0.068161	0.06813	0.068329
414	0.001434	0.001328	0.001526	0.028915	0.028168	0.028259	0.049454	0.049545	0.049469	0.062775	0.062912	0.063004	0.067368	0.067505	0.067368	0.067123	0.067062	0.067154
415	0.001465	0.001526	0.001465	0.028641	0.027985	0.027985	0.049042	0.04895	0.048996	0.06192	0.062103	0.062119	0.066544	0.066498	0.066483	0.066254	0.066223	0.066406
416	0.002136	0.001968	0.001999	0.028793	0.028076	0.028137	0.048996	0.048935	0.049026	0.061737	0.061768	0.061905	0.066299	0.066162	0.066208	0.065826	0.065857	0.065948
417	0.001694	0.00148	0.001511	0.028244	0.027451	0.027466	0.047974	0.04805	0.047958	0.060486	0.060562	0.060638	0.064987	0.064926	0.06488	0.064667	0.064697	0.064819
418	0.001389	0.001312	0.001175	0.027679	0.026932	0.026993	0.047195	0.047318	0.047195	0.059601	0.059662	0.059723	0.063812	0.063797	0.063828	0.063675	0.063599	0.063751
419	0.001404	0.001373	0.001282	0.027267	0.026611	0.026657	0.046738	0.046677	0.046539	0.058853	0.059036	0.059082	0.06311	0.062912	0.063019	0.062607	0.062714	0.062561
420	0.001358	0.001221	0.001266	0.026886	0.026321	0.026215	0.046112	0.046036	0.045959	0.058075	0.058182	0.058228	0.062042	0.062027	0.062057	0.061737	0.061676	0.061722
421	0.001312	0.00116	0.001205	0.026779	0.026138	0.026031	0.045547	0.045486	0.045441	0.057388	0.057495	0.057602	0.061218	0.061081	0.061234	0.060745	0.060715	0.060852
422	0.001419	0.001297	0.001297	0.026535	0.025772	0.025803	0.04512	0.045029	0.045059	0.056625	0.056778	0.056854	0.060471	0.060333	0.060455	0.059998	0.05986	0.059967
423	0.001572	0.001434	0.00145	0.026276	0.02562	0.025589	0.044632	0.044678	0.044601	0.055984	0.056183	0.05629	0.059845	0.059723	0.059708	0.059158	0.059082	0.05899
424	0.00145	0.001373	0.001404	0.02597	0.025208	0.02536	0.044205	0.044159	0.044205	0.055481	0.055618	0.055527	0.059006	0.058914	0.05899	0.058365	0.05835	0.058334
425	0.001373	0.001328	0.001404	0.025726	0.025101	0.025146	0.043915	0.043777	0.043869	0.054855	0.054993	0.054916	0.058289	0.058273	0.058228	0.057648	0.057617	0.057587
426	0.001358	0.001221	0.001465	0.025482	0.024887	0.024826	0.043427	0.043442	0.043442	0.054321	0.054413	0.054459	0.057541	0.057526	0.057495	0.056915	0.056915	0.056839
427	0.001343	0.001297	0.001358	0.025299	0.024536	0.024506	0.042984	0.042999	0.042892	0.053482	0.053635	0.053711	0.056778	0.056732	0.056686	0.056168	0.056213	0.056122
428	0.001328	0.001328	0.001266	0.025162	0.024323	0.024475	0.042633	0.042648	0.042526	0.053009	0.053085	0.053162	0.056076	0.056198	0.055984	0.055496	0.055496	0.055389
429	0.001419	0.001343	0.001328	0.024719	0.024078	0.024139	0.042145	0.04216	0.042206	0.052307	0.052551	0.052582	0.055466	0.055481	0.055328	0.054688	0.054657	0.054611
430	0.001373	0.001373	0.001312	0.024582	0.023956	0.023956	0.041733	0.041809	0.041794	0.051727	0.051849	0.051956	0.05484	0.054718	0.054703	0.05397	0.053955	0.053925
431	0.001373	0.001343	0.001297	0.024445	0.023758	0.023819	0.041321	0.041367	0.041367	0.051208	0.051331	0.051468	0.054169	0.054001	0.054001	0.053314	0.053223	0.053314
432	0.001297	0.001297	0.001236	0.024261	0.023514	0.023651	0.040985	0.040909	0.040909	0.050659	0.050797	0.050934	0.053513	0.053406	0.053452	0.052689	0.052628	0.052612
433	0.001358	0.001404	0.001389	0.024094	0.023315	0.023468	0.040588	0.040588	0.040527	0.05014	0.050262	0.050354	0.052963	0.052856	0.052872	0.051956	0.05191	0.051941
434	0.001312	0.001434	0.001221	0.023956	0.023285	0.023193	0.040192	0.040146	0.040146	0.049637	0.049759	0.049789	0.052261	0.052261	0.052277	0.051315	0.051193	0.05127
435	0.001358	0.001221	0.001282	0.023666	0.023026	0.022934	0.039825	0.039841	0.039841	0.049011	0.04924	0.049164	0.051682	0.051559	0.051636	0.050659	0.050644	0.05072
436	0.001511	0.001343	0.001297	0.023514	0.022797	0.022705	0.039459	0.039536	0.039474	0.048508	0.048706	0.048752	0.051056	0.050949	0.050949	0.050095	0.050064	0.050064
437	0.001404	0.001312	0.001251	0.023499	0.022781	0.022766	0.039093	0.039215	0.039078	0.04808	0.048264	0.04834	0.050522	0.050446	0.050339	0.049469	0.049347	0.049637
438	0.001343	0.001343	0.001373	0.023346	0.022675	0.022598	0.038757	0.038879	0.038849	0.047531	0.047745	0.04776	0.049957	0.049805	0.049774	0.048798	0.048813	0.04895
439	0.001465	0.00148	0.001343	0.023178	0.0224	0.022461	0.038544	0.038589	0.038528	0.047104	0.047318	0.047287	0.049408	0.049332	0.049362	0.048203	0.048157	0.048157
440	0.001511	0.001465	0.001434	0.02298	0.022247	0.022247	0.038315	0.0383	0.038177	0.046707	0.046799	0.04689	0.048904	0.04892	0.048828	0.047684	0.047592	0.047562
441	0.001434	0.001419	0.001282	0.022736	0.022064	0.021957	0.037964	0.037903	0.037827	0.046188	0.046326	0.046326	0.048431	0.048294	0.048279	0.047043	0.046921	0.046921
442	0.001419	0.001312	0.001328	0.022537	0.02182	0.021805	0.037643	0.037643	0.037567	0.045776	0.045807	0.045883	0.047928	0.047836	0.04776	0.046417	0.046387	0.046249
443	0.00145	0.001221	0.001282	0.022339	0.021622	0.021637	0.037323	0.037216	0.037277	0.045273	0.045319	0.045395	0.047302	0.047241	0.047119	0.045929	0.045975	0.045837
444	0.001328	0.001236	0.001358	0.022202	0.021561	0.021484	0.036942	0.03688	0.037048	0.044739	0.044891	0.044952	0.046707	0.046661	0.046509	0.045303	0.045181	0.045242
445	0.001312	0.00119	0.001343	0.022125	0.021454	0.021439	0.036606	0.036682	0.036652	0.044418	0.044449	0.044571	0.046143	0.046051	0.046112	0.044708	0.044601	0.044678
446	0.001373	0.001312	0.001404	0.021896	0.02121	0.021133	0.036316	0.036377	0.036392	0.043976	0.044067	0.044052	0.045715	0.045578	0.045654	0.044098	0.044052	0.044128
447	0.001419	0.001373	0.001434	0.021744	0.021088	0.021118	0.03598	0.035995	0.036041	0.043518	0.043549	0.04361	0.045227	0.04512	0.045105	0.043747	0.043625	0.043732
448	0.001434	0.001373	0.001389	0.021622	0.02092	0.020996	0.035751	0.035721	0.035782	0.043091	0.043304	0.043259	0.044678	0.044586	0.044525	0.043152	0.043076	0.043091
449	0.001419	0.001343	0.001404	0.021454	0.020706	0.020828	0.035492	0.035477	0.035492	0.042664	0.042847	0.042831	0.04422	0.044189	0.044144	0.042786	0.042709	0.042709
450	0.001495	0.001373	0.001373	0.021317	0.020676	0.020737	0.035263	0.035248	0.035187	0.042252	0.042297	0.042404	0.043747	0.04364	0.043671	0.042252	0.042175	0.042221
451	0.001495	0.001328	0.001297	0.021179	0.020523	0.02063	0.034866	0.035049	0.034927	0.041946	0.041992	0.042038	0.043304	0.043198	0.043182	0.04184	0.041656	0.041641
452	0.001572	0.00145	0.001236	0.021164	0.020447	0.020538	0.034836	0.034836	0.03479	0.041656	0.041611	0.041687	0.042923	0.042831	0.042786	0.041306	0.041275	0.04126
453	0.00148	0.001282	0.001282	0.020996	0.020309	0.020309	0.034546	0.034515	0.034622	0.041367	0.041397	0.041351	0.042557	0.042358	0.042435	0.040863	0.040817	0.040817
454	0.001419	0.001205	0.001282	0.020874	0.020264	0.020233	0.034241	0.034271	0.034363	0.041107	0.041031	0.04097	0.042099	0.042007	0.042038	0.040497	0.040421	0.040573
455	0.001465	0.001312	0.001328	0.020737	0.020157	0.020096	0.03392	0.034027	0.034027	0.040695	0.040604	0.04068	0.041702	0.041641	0.04158	0.040009	0.039978	0.040054
456	0.001343	0.001297	0.001328	0.020676	0.02005	0.019943	0.033768	0.033798	0.033844	0.040298	0.040268	0.040314	0.04129	0.041138	0.041153	0.039566	0.039536	0.039536
457	0.001328	0.001297	0.001328	0.020615	0.019928	0.019852	0.033676	0.033569	0.033661	0.039902	0.039948	0.040131	0.040848	0.040787	0.040695	0.039185	0.039139	0.039063
458	0.001373	0.001297	0.001404	0.020493	0.019897	0.019836	0.033508	0.033386	0.033356	0.039474	0.039551	0.039749	0.040482	0.040497	0.040375	0.038788	0.038727	0.038757
459	0.001404	0.001297	0.001266	0.020416	0.019791	0.01973	0.033264	0.033142	0.033203	0.039337	0.039337	0.03952	0.040237	0.040161	0.04007	0.038513	0.038467	0.038361
460	0.001465	0.001328	0.001373	0.020416	0.01973	0.019608	0.033081	0.033112	0.033005	0.039108	0.039017	0.0392	0.039749	0.039764	0.039703	0.038025	0.038055	0.037964
461	0.00148	0.001328	0.001373	0.020386	0.019699	0.019577	0.032883	0.032913	0.032822	0.038742	0.038834	0.038864	0.039398	0.039429	0.039352	0.037598	0.037643	0.037567
462	0.001511	0.001343	0.001419	0.020264	0.019577	0.019547	0.03273	0.032715	0.032745	0.038391	0.038544	0.038559	0.039078	0.039032	0.039032	0.037277	0.037277	0.037216
463	0.001373	0.001236	0.001343	0.020172	0.019455	0.019455	0.032623	0.032578	0.032654	0.038086	0.038193	0.038254	0.038742	0.038559	0.038773	0.036987	0.036987	0.036865
464	0.001373	0.001251	0.001312	0.02005	0.01944	0.019318	0.032318	0.032379	0.032333	0.037735	0.037903	0.037949	0.038391	0.0383	0.038361	0.036728	0.036743	0.036591
465	0.00145	0.001343	0.001328	0.020081	0.019455	0.019272	0.032196	0.032135	0.032166	0.037491	0.037689	0.037766	0.038055	0.037949	0.03804	0.036316	0.03627	0.036194
466	0.001572	0.001434	0.00145	0.02005	0.019348	0.019302	0.032074	0.032028	0.032028	0.037201	0.037399	0.03743	0.037918	0.037796	0.037766	0.035889	0.035873	0.035843
467	0.001434	0.001312	0.00145	0.019867	0.019302	0.019196	0.031876	0.031815	0.031876	0.036957	0.037155	0.037155	0.037628	0.037476	0.03743	0.035522	0.035583	0.035568
468	0.00145	0.001328	0.001343	0.019882	0.019272	0.019211	0.031769	0.031662	0.031693	0.036728	0.03688	0.036942	0.037369	0.03714	0.037109	0.035217	0.035217	0.035278
469	0.001419	0.001373	0.001343	0.019806	0.019104	0.01915	0.031647	0.03157	0.031647	0.03656	0.036621	0.036789	0.036987	0.03685	0.036804	0.034897	0.034897	0.034866
470	0.001373	0.001434	0.001312	0.019852	0.019196	0.019196	0.031525	0.031464	0.031479	0.036362	0.036423	0.036484	0.036667	0.036575	0.036407	0.034653	0.034653	0.034561
471	0.001419	0.00148	0.001373	0.019806	0.019104	0.019135	0.03125	0.031235	0.031281	0.036118	0.036163	0.03627	0.036362	0.036301	0.036194	0.034393	0.034348	0.034332
472	0.001465	0.001434	0.001434	0.019775	0.019073	0.019058	0.031158	0.031219	0.031174	0.035767	0.035965	0.035965	0.036057	0.036026	0.035904	0.034119	0.034119	0.034058
473	0.001434	0.001404	0.001419	0.019699	0.019073	0.019058	0.030991	0.031021	0.030945	0.035645	0.035721	0.035828	0.035736	0.035736	0.035645	0.033844	0.033859	0.033707
474	0.001434	0.001343	0.001328	0.01976	0.019012	0.018951	0.030853	0.030792	0.030823	0.035507	0.035538	0.03566	0.035385	0.035416	0.03537	0.033447	0.033371	0.033432
475	0.00145	0.001373	0.001282	0.01976	0.018967	0.018982	0.030762	0.030777	0.030731	0.035156	0.035416	0.035416	0.035217	0.035187	0.035217	0.033264	0.033142	0.033188
476	0.001465	0.001404	0.001404	0.019684	0.019028	0.019012	0.030685	0.030685	0.030701	0.03508	0.035126	0.035233	0.03508	0.034988	0.034943	0.032867	0.032913	0.032898
477	0.00148	0.001434	0.001434	0.01976	0.019119	0.019058	0.030579	0.030487	0.030518	0.034851	0.035004	0.034988	0.034729	0.034729	0.034653	0.032669	0.032654	0.0327
478	0.001419	0.001419	0.001434	0.019684	0.019073	0.019073	0.030472	0.030396	0.030365	0.034576	0.034668	0.03479	0.034485	0.034393	0.034378	0.03241	0.032303	0.03241
479	0.001434	0.001434	0.001465	0.019775	0.018997	0.019089	0.030365	0.030258	0.030319	0.034409	0.034531	0.034576	0.03421	0.034149	0.034225	0.032074	0.031952	0.031906
480	0.001419	0.001343	0.001373	0.019745	0.018982	0.019073	0.030182	0.030136	0.030212	0.03418	0.034286	0.034409	0.033997	0.033936	0.033905	0.031921	0.03186	0.031876
481	0.001389	0.001389	0.001343	0.019714	0.019028	0.018997	0.030045	0.029953	0.030075	0.033936	0.034134	0.034256	0.033768	0.033676	0.033752	0.031647	0.031525	0.031525
482	0.00145	0.001434	0.001389	0.019745	0.019089	0.019073	0.029953	0.029892	0.029892	0.033859	0.033981	0.033997	0.033493	0.033478	0.033585	0.031326	0.03125	0.031281
483	0.001434	0.001358	0.001358	0.019714	0.019012	0.018982	0.029739	0.0298	0.02977	0.033691	0.033798	0.033768	0.033295	0.033279	0.03334	0.031097	0.031021	0.03096
484	0.001511	0.001434	0.001434	0.019775	0.019104	0.018997	0.029724	0.029678	0.029724	0.033493	0.033646	0.033691	0.033096	0.03299	0.033051	0.030777	0.030731	0.030746
485	0.001434	0.001419	0.001419	0.019699	0.019012	0.018967	0.029663	0.029556	0.029648	0.033249	0.033371	0.033447	0.032852	0.032776	0.032776	0.030518	0.030502	0.030548
486	0.001389	0.001328	0.001373	0.019699	0.019119	0.019043	0.029526	0.02948	0.029541	0.033066	0.033218	0.033249	0.032654	0.032578	0.032593	0.030396	0.030319	0.030365
487	0.001389	0.001434	0.001343	0.019577	0.018951	0.018906	0.029434	0.029388	0.029449	0.032913	0.033096	0.033127	0.032318	0.032379	0.03241	0.03006	0.030029	0.030121
488	0.00145	0.001419	0.00145	0.019684	0.018997	0.018951	0.029282	0.029205	0.029282	0.032852	0.033005	0.033005	0.03215	0.032166	0.03212	0.029892	0.029922	0.029953
489	0.001465	0.001389	0.00145	0.019562	0.018967	0.018967	0.029221	0.029114	0.029114	0.032623	0.032684	0.032806	0.031982	0.031906	0.03186	0.029602	0.029633	0.029633
490	0.00145	0.001419	0.001465	0.019547	0.018829	0.018784	0.029053	0.028976	0.029022	0.032379	0.032288	0.032547	0.031662	0.031555	0.031708	0.029404	0.029343	0.029404
491	0.001404	0.001328	0.001465	0.019531	0.018738	0.018829	0.028793	0.028824	0.028854	0.032166	0.032181	0.032349	0.03154	0.031403	0.031464	0.02919	0.029114	0.029266
492	0.00145	0.001312	0.001343	0.01944	0.018738	0.018799	0.028702	0.028732	0.028732	0.031937	0.032043	0.032104	0.031235	0.031326	0.031189	0.028961	0.028915	0.029068
493	0.001419	0.001358	0.001205	0.019485	0.018738	0.018677	0.028519	0.02858	0.02861	0.031738	0.031845	0.03186	0.030975	0.030869	0.030899	0.028656	0.028656	0.028702
494	0.001419	0.001373	0.001312	0.01944	0.018738	0.018661	0.02832	0.028381	0.028351	0.031525	0.03157	0.031601	0.030579	0.030579	0.030563	0.028259	0.02832	0.028305
495	0.001419	0.001587	0.001419	0.019348	0.018677	0.018692	0.028214	0.028229	0.028198	0.031265	0.031342	0.031342	0.030289	0.03035	0.030365	0.028091	0.028061	0.028015
496	0.001511	0.001648	0.001465	0.019226	0.018539	0.018478	0.027954	0.027954	0.028	0.031021	0.031006	0.031113	0.030075	0.030045	0.030075	0.027817	0.027756	0.027756
497	0.001465	0.001465	0.001389	0.019104	0.018478	0.018417	0.027756	0.027771	0.027786	0.030685	0.030731	0.030869	0.029892	0.0298	0.029831	0.027512	0.027405	0.02739
498	0.001465	0.001312	0.001419	0.018967	0.018326	0.018372	0.027603	0.027557	0.027588	0.030502	0.030594	0.030685	0.029663	0.029526	0.029602	0.027191	0.027054	0.027145
499	0.001312	0.001343	0.001373	0.018875	0.01825	0.018066	0.027405	0.027313	0.027328	0.030228	0.030365	0.03038	0.029373	0.029236	0.029251	0.026871	0.026932	0.026932
500	0.001389	0.001358	0.001373	0.018753	0.018051	0.018005	0.027176	0.027145	0.027161	0.029938	0.030045	0.03009	0.029083	0.029037	0.028976	0.026703	0.026672	0.026703
501	0.001404	0.001419	0.001404	0.018707	0.01796	0.017975	0.026962	0.026917	0.026978	0.029755	0.029755	0.029816	0.028824	0.028671	0.028717	0.026443	0.026367	0.026428
502	0.001419	0.001419	0.001343	0.018494	0.017822	0.017792	0.026718	0.026688	0.026733	0.029419	0.029495	0.029541	0.028534	0.028275	0.028381	0.026199	0.026031	0.026123
503	0.001434	0.001404	0.001343	0.018311	0.017624	0.017517	0.026413	0.026428	0.026398	0.029022	0.029129	0.029236	0.028198	0.028046	0.028046	0.025818	0.025757	0.025787
504	0.001511	0.001373	0.001419	0.018265	0.017532	0.017502	0.026215	0.026199	0.026184	0.028732	0.028885	0.028915	0.027847	0.027725	0.027756	0.025558	0.025482	0.025558
505	0.001495	0.001358	0.001419	0.018204	0.017502	0.017456	0.026001	0.026031	0.02597	0.028412	0.028595	0.028595	0.027618	0.027496	0.02742	0.025299	0.025253	0.025345
506	0.001404	0.001328	0.001373	0.018097	0.017349	0.017349	0.025696	0.025681	0.025726	0.028168	0.02829	0.028259	0.027298	0.027191	0.027145	0.024963	0.024918	0.024918
507	0.00145	0.001358	0.001389	0.017868	0.017151	0.017166	0.025452	0.025436	0.025467	0.028061	0.028152	0.028183	0.027069	0.026901	0.026917	0.024551	0.024536	0.024567
508	0.001373	0.001282	0.001343	0.0177	0.017059	0.016998	0.025192	0.025238	0.025238	0.027679	0.027863	0.027863	0.026627	0.026627	0.026611	0.024384	0.024384	0.02446
509	0.001434	0.001343	0.001343	0.017548	0.016968	0.016861	0.024933	0.024979	0.025009	0.027374	0.027542	0.027496	0.026321	0.026321	0.026352	0.024231	0.024094	0.0242
510	0.00148	0.001343	0.001358	0.017471	0.0168	0.016724	0.02478	0.02475	0.024872	0.02713	0.027206	0.027252	0.025925	0.026001	0.026016	0.023865	0.023758	0.023849
511	0.001465	0.001328	0.001389	0.017349	0.016617	0.016556	0.024521	0.024475	0.024567	0.02684	0.02684	0.02684	0.02565	0.025726	0.025696	0.023544	0.023438	0.023499
512	0.001282	0.001282	0.001328	0.017197	0.016525	0.016388	0.024261	0.024139	0.024384	0.026581	0.026596	0.026657	0.025345	0.02536	0.025391	0.023178	0.023178	0.023254
513	0.001312	0.001236	0.001221	0.016998	0.016327	0.016266	0.024017	0.023987	0.024063	0.026337	0.026321	0.026337	0.025116	0.025146	0.025162	0.022964	0.022964	0.022964
514	0.001266	0.001266	0.001251	0.016922	0.016159	0.016144	0.023834	0.023926	0.023849	0.02594	0.026154	0.026169	0.024796	0.024933	0.024811	0.02269	0.022629	0.022644
515	0.001389	0.001221	0.001297	0.016724	0.015961	0.016006	0.023621	0.02356	0.023529	0.025742	0.025833	0.025894	0.024475	0.024612	0.024506	0.022476	0.022491	0.022369
516	0.001389	0.001282	0.001343	0.016541	0.015869	0.015869	0.023346	0.023422	0.023346	0.025452	0.025513	0.025482	0.024261	0.024292	0.024368	0.022217	0.022202	0.022079
517	0.001312	0.001236	0.001251	0.016403	0.015778	0.015701	0.023132	0.023071	0.023102	0.02504	0.025146	0.025177	0.024063	0.024017	0.024094	0.021912	0.021835	0.021896
518	0.00145	0.001236	0.001297	0.016327	0.015732	0.015579	0.022873	0.022705	0.022842	0.024841	0.024948	0.024979	0.023834	0.023773	0.023743	0.021606	0.021622	0.021622
519	0.001373	0.001251	0.001251	0.016113	0.015518	0.015488	0.022583	0.022507	0.022552	0.024506	0.024612	0.024719	0.023544	0.023438	0.023483	0.021393	0.021347	0.021362
520	0.001343	0.001236	0.001129	0.0159	0.01535	0.015259	0.022369	0.022293	0.02243	0.024216	0.024338	0.024384	0.023209	0.023132	0.02327	0.021072	0.020966	0.02095
521	0.001236	0.001175	0.001144	0.015808	0.015152	0.015091	0.02211	0.022186	0.022141	0.024063	0.024109	0.024216	0.022964	0.022964	0.02298	0.020859	0.020645	0.020691
522	0.001236	0.001205	0.001251	0.015701	0.01503	0.015015	0.021881	0.022034	0.021973	0.023819	0.02388	0.024048	0.022644	0.022598	0.022675	0.020462	0.02034	0.020386
523	0.001251	0.001266	0.00119	0.015472	0.014816	0.014801	0.021759	0.021744	0.021759	0.023438	0.023575	0.023651	0.022293	0.022324	0.022293	0.020187	0.020142	0.020111
524	0.001251	0.001282	0.001236	0.015305	0.014664	0.014603	0.02153	0.02153	0.02153	0.023117	0.023285	0.023376	0.022079	0.022125	0.021957	0.019958	0.019836	0.019867
525	0.001266	0.001266	0.001221	0.015137	0.014496	0.014511	0.021286	0.021454	0.021286	0.022964	0.023087	0.023041	0.02182	0.021896	0.021759	0.019699	0.019592	0.019699
526	0.001205	0.001221	0.00119	0.015076	0.014328	0.014359	0.021072	0.021103	0.021027	0.022614	0.022797	0.022781	0.021561	0.021515	0.02153	0.019424	0.019363	0.019394
527	0.001205	0.001129	0.001175	0.014755	0.01413	0.014175	0.020782	0.020767	0.020782	0.022354	0.022415	0.022537	0.02124	0.02121	0.021194	0.01915	0.01915	0.019119
528	0.001221	0.001175	0.001236	0.014648	0.014053	0.014084	0.020447	0.020538	0.020508	0.022171	0.022202	0.022324	0.021057	0.021011	0.020889	0.018906	0.018875	0.018936
529	0.001221	0.001282	0.001205	0.014557	0.013855	0.013992	0.02037	0.020233	0.02034	0.021896	0.021957	0.022079	0.020798	0.020813	0.020691	0.018723	0.018707	0.018692
530	0.001251	0.001175	0.001144	0.014328	0.013641	0.013657	0.020187	0.020157	0.020172	0.021591	0.021683	0.02179	0.020538	0.020554	0.020401	0.018509	0.018417	0.018448
531	0.001312	0.001205	0.001205	0.014206	0.013489	0.013397	0.019974	0.019928	0.019943	0.021347	0.021439	0.021545	0.020386	0.020325	0.020233	0.018295	0.01825	0.018173
532	0.00116	0.001205	0.001221	0.014053	0.013336	0.013306	0.019775	0.019714	0.01976	0.021164	0.021225	0.021362	0.02005	0.019882	0.019913	0.01796	0.017929	0.017929
533	0.001175	0.001297	0.00116	0.013885	0.013229	0.013184	0.019623	0.019562	0.019653	0.020935	0.021027	0.021088	0.019775	0.019699	0.019669	0.017731	0.017715	0.017746
534	0.001114	0.00119	0.001099	0.013733	0.013046	0.013062	0.019379	0.019409	0.019348	0.020706	0.020782	0.020844	0.019516	0.019485	0.019363	0.017563	0.017548	0.017654
535	0.001099	0.00116	0.001129	0.013626	0.012939	0.012924	0.019241	0.01918	0.019165	0.020447	0.020508	0.020615	0.019287	0.01915	0.019165	0.017303	0.017242	0.017242
536	0.001251	0.001205	0.001328	0.013474	0.012894	0.012863	0.019165	0.019043	0.019119	0.020401	0.020401	0.020493	0.019135	0.019028	0.019073	0.017166	0.017044	0.017075
537	0.001312	0.001251	0.001358	0.013336	0.012711	0.012665	0.018875	0.018799	0.018768	0.020248	0.020081	0.020294	0.018936	0.01886	0.018875	0.017044	0.01683	0.016815
538	0.00119	0.001144	0.001221	0.013229	0.012573	0.012482	0.018585	0.018585	0.018555	0.019867	0.019943	0.020096	0.018707	0.018585	0.018555	0.016754	0.016541	0.016602
539	0.001266	0.001236	0.001266	0.013062	0.012421	0.012375	0.018417	0.018402	0.018448	0.019745	0.019821	0.019928	0.018539	0.018433	0.018417	0.016617	0.016449	0.016479
540	0.001266	0.001221	0.001343	0.01297	0.012329	0.012207	0.018219	0.018188	0.018265	0.019455	0.019669	0.019638	0.018311	0.018158	0.018173	0.016296	0.016342	0.016235
541	0.001251	0.001144	0.001236	0.012802	0.012207	0.012146	0.017975	0.01799	0.018051	0.019272	0.019547	0.019394	0.018036	0.017929	0.017899	0.01619	0.016144	0.016068
542	0.001251	0.001129	0.00119	0.012665	0.01207	0.011948	0.017807	0.017868	0.017822	0.019104	0.019302	0.019135	0.017822	0.017715	0.017685	0.015945	0.016068	0.015793
543	0.00119	0.00116	0.001129	0.012466	0.011917	0.011719	0.01767	0.01767	0.017609	0.018906	0.018875	0.019012	0.017578	0.017395	0.017456	0.015656	0.015533	0.015625
544	0.001205	0.00119	0.001144	0.012329	0.011749	0.011642	0.017517	0.017502	0.017532	0.018616	0.018753	0.018784	0.017395	0.017258	0.017273	0.015457	0.01532	0.015427
545	0.001221	0.001205	0.001175	0.012161	0.011536	0.01149	0.017319	0.017258	0.017334	0.018341	0.018524	0.018539	0.017075	0.017014	0.017059	0.015289	0.015198	0.015198
546	0.001251	0.001236	0.001175	0.012131	0.011429	0.011459	0.017075	0.017059	0.01709	0.018234	0.018341	0.018311	0.016968	0.016846	0.016891	0.015121	0.014938	0.014923
547	0.001205	0.001068	0.001099	0.011932	0.011292	0.011353	0.016953	0.016907	0.016846	0.018005	0.018112	0.018143	0.016815	0.016647	0.016678	0.014908	0.014801	0.01474
548	0.001251	0.001114	0.001175	0.011795	0.011169	0.0112	0.01683	0.016815	0.016754	0.017731	0.017853	0.017914	0.016647	0.016541	0.016495	0.014587	0.014633	0.014618
549	0.001205	0.00119	0.00119	0.011734	0.010971	0.010925	0.016632	0.016586	0.016556	0.017578	0.01767	0.0177	0.016418	0.016342	0.016312	0.014389	0.014389	0.014496
550	0.001175	0.001114	0.001144	0.011597	0.010895	0.010803	0.016464	0.016464	0.016403	0.01741	0.017456	0.017517	0.016144	0.016144	0.016068	0.014328	0.014313	0.014313
551	0.001175	0.001114	0.001144	0.01149	0.010742	0.010742	0.016251	0.016251	0.01619	0.017258	0.017273	0.017242	0.015915	0.015915	0.0159	0.014175	0.014069	0.014069
552	0.001144	0.001114	0.001129	0.011337	0.010635	0.010483	0.016068	0.016068	0.016037	0.017044	0.016998	0.017136	0.015747	0.015671	0.015701	0.013901	0.013947	0.013901
553	0.001129	0.001038	0.001129	0.011154	0.010605	0.010391	0.015854	0.015961	0.0159	0.016724	0.016769	0.016922	0.015533	0.015564	0.015564	0.013824	0.013931	0.013809
554	0.001144	0.001099	0.001144	0.011078	0.010483	0.010269	0.015747	0.015839	0.015686	0.016541	0.016647	0.016815	0.015457	0.015427	0.015427	0.013702	0.013626	0.013611
555	0.001144	0.001129	0.001099	0.010986	0.01033	0.010315	0.015533	0.015625	0.015472	0.016403	0.016556	0.016663	0.015259	0.015182	0.015167	0.01358	0.013489	0.013443
556	0.000946	0.001007	0.001022	0.010696	0.010147	0.010071	0.01532	0.015305	0.01535	0.016235	0.016312	0.016373	0.015121	0.014954	0.014969	0.013275	0.01326	0.013184
557	0.001053	0.001099	0.001038	0.010696	0.009964	0.009949	0.015213	0.015106	0.015198	0.015945	0.016006	0.016129	0.014923	0.014816	0.014786	0.013062	0.013062	0.01297
558	0.001083	0.001144	0.001068	0.010559	0.009796	0.009735	0.014999	0.014969	0.014938	0.015747	0.015793	0.015961	0.014664	0.014664	0.014648	0.012848	0.012802	0.012833
559	0.001129	0.001144	0.001129	0.010422	0.00975	0.009659	0.014954	0.014893	0.014877	0.015579	0.01564	0.015793	0.014481	0.014542	0.014481	0.012787	0.012634	0.012741
560	0.001129	0.001144	0.001038	0.010254	0.009567	0.009583	0.014816	0.014679	0.014709	0.015396	0.015457	0.015549	0.014404	0.014359	0.014313	0.012665	0.012527	0.012558
561	0.001099	0.001129	0.000992	0.010162	0.009384	0.009476	0.014603	0.01445	0.014557	0.015289	0.015274	0.015427	0.014236	0.014099	0.014145	0.012558	0.012405	0.012421
562	0.001038	0.001114	0.000977	0.010025	0.009262	0.009308	0.014374	0.014404	0.014374	0.015106	0.015167	0.015259	0.01413	0.014023	0.014023	0.012543	0.01239	0.012436
563	0.000977	0.001099	0.001053	0.009949	0.009216	0.009201	0.014221	0.014282	0.014206	0.014923	0.014984	0.015106	0.014023	0.013794	0.01387	0.012192	0.012253	0.012146
564	0.000977	0.000992	0.001007	0.009827	0.009125	0.009171	0.014099	0.014145	0.014069	0.014771	0.014862	0.014954	0.013733	0.013596	0.013657	0.011978	0.011932	0.011963
565	0.001007	0.001038	0.000961	0.009598	0.008911	0.009033	0.013901	0.013977	0.013901	0.014648	0.014709	0.014771	0.013565	0.013458	0.013428	0.011902	0.011765	0.011871
566	0.000961	0.001038	0.001038	0.009506	0.008865	0.008865	0.013718	0.013809	0.01387	0.014481	0.014465	0.014679	0.013458	0.013351	0.013306	0.011765	0.011688	0.011688
567	0.001068	0.001007	0.001038	0.00943	0.00885	0.008743	0.013718	0.013687	0.013687	0.014328	0.014282	0.014481	0.013321	0.013245	0.013229	0.011658	0.011551	0.01152
568	0.001114	0.001038	0.001022	0.009369	0.008636	0.00856	0.01358	0.01355	0.013519	0.014191	0.01416	0.014297	0.013123	0.013153	0.013107	0.011536	0.011475	0.011459
569	0.001022	0.001053	0.000977	0.009155	0.008438	0.008362	0.013336	0.013306	0.013351	0.014023	0.014069	0.01413	0.013	0.012939	0.012924	0.011398	0.011353	0.011398
570	0.001053	0.001083	0.000992	0.009079	0.008392	0.008347	0.013214	0.013153	0.013184	0.013901	0.013916	0.013977	0.012894	0.012817	0.012756	0.011215	0.011292	0.011276
571	0.001053	0.001099	0.001022	0.009079	0.008453	0.008331	0.013077	0.013092	0.013107	0.013702	0.013763	0.013794	0.012711	0.01265	0.012619	0.011002	0.011124	0.011032
572	0.001007	0.001053	0.000977	0.008972	0.008362	0.008209	0.012878	0.013	0.012939	0.013474	0.013596	0.013672	0.012512	0.012497	0.012436	0.010941	0.010956	0.01091
573	0.001053	0.001068	0.000961	0.008774	0.008026	0.008041	0.012833	0.012863	0.012878	0.013412	0.013382	0.01355	0.012405	0.012375	0.012314	0.010834	0.010941	0.010849
574	0.001022	0.001083	0.000992	0.008682	0.007996	0.007935	0.012741	0.012726	0.012695	0.013321	0.013214	0.01326	0.012299	0.012253	0.012222	0.010788	0.010727	0.01062
575	0.000977	0.001099	0.001007	0.008621	0.00798	0.007965	0.012573	0.01265	0.012573	0.013031	0.013077	0.013153	0.012177	0.01207	0.012009	0.010483	0.010513	0.010361
576	0.000946	0.001038	0.000961	0.008453	0.007919	0.007736	0.012405	0.012573	0.012421	0.012863	0.012909	0.013031	0.011978	0.011917	0.011902	0.010239	0.0103	0.010239
577	0.000977	0.001038	0.001007	0.008347	0.007782	0.007584	0.012344	0.012421	0.012344	0.012802	0.012741	0.012894	0.011887	0.011826	0.011871	0.01033	0.0103	0.010269
578	0.0009	0.000977	0.000992	0.00827	0.007614	0.007553	0.012177	0.0121	0.012177	0.012741	0.012695	0.012787	0.01178	0.011765	0.011673	0.010208	0.010147	0.010162
579	0.000931	0.000885	0.000931	0.008224	0.007507	0.007568	0.012054	0.011993	0.012039	0.012619	0.012589	0.012634	0.01152	0.01152	0.01149	0.010162	0.010071	0.010056
580	0.00087	0.000824	0.001038	0.008087	0.007401	0.007324	0.011856	0.011978	0.011932	0.012497	0.012466	0.012436	0.011505	0.011444	0.011368	0.009964	0.009903	0.009842
581	0.000854	0.000992	0.001022	0.008072	0.007324	0.007263	0.01181	0.011917	0.011749	0.01236	0.012314	0.012314	0.011322	0.011368	0.011276	0.009842	0.009735	0.009674
582	0.000961	0.000961	0.000961	0.007858	0.007294	0.007111	0.011597	0.011673	0.011536	0.012161	0.012131	0.012222	0.011093	0.011307	0.011108	0.00972	0.009613	0.009567
583	0.000961	0.000977	0.000885	0.007843	0.007233	0.00705	0.01152	0.011566	0.011505	0.011978	0.011978	0.012146	0.011078	0.011169	0.010971	0.009552	0.009476	0.009445
584	0.001053	0.001038	0.000916	0.00769	0.007095	0.006958	0.011444	0.01152	0.011398	0.01181	0.011871	0.012024	0.011185	0.011002	0.010971	0.009445	0.009338	0.009338
585	0.001068	0.001068	0.001007	0.007675	0.007004	0.006882	0.011353	0.011444	0.011307	0.011719	0.011856	0.011871	0.010925	0.010895	0.010849	0.009354	0.009293	0.009262
586	0.000992	0.000992	0.001068	0.007568	0.006897	0.006729	0.011185	0.011337	0.011185	0.011566	0.011673	0.011734	0.010803	0.010727	0.01062	0.009201	0.009216	0.009125
587	0.001007	0.000916	0.001053	0.007553	0.006897	0.006775	0.011169	0.011215	0.011185	0.011566	0.011642	0.011765	0.010681	0.010559	0.010483	0.009109	0.008987	0.009003
588	0.001007	0.0009	0.000961	0.007477	0.006882	0.006821	0.011078	0.011017	0.011032	0.01149	0.011536	0.011581	0.010574	0.010483	0.010452	0.009064	0.008865	0.008926
589	0.001038	0.001038	0.001007	0.007401	0.00676	0.006653	0.010986	0.010941	0.01091	0.011276	0.011322	0.011353	0.010406	0.010269	0.010391	0.008987	0.00882	0.008865
590	0.0009	0.001068	0.001022	0.007263	0.006531	0.00647	0.010773	0.010788	0.010757	0.011124	0.011169	0.011353	0.010269	0.010132	0.010193	0.008804	0.008774	0.008743
591	0.000961	0.000977	0.0009	0.007202	0.0065	0.006485	0.010635	0.010651	0.010696	0.011047	0.011078	0.0112	0.010223	0.010162	0.010117	0.008743	0.008743	0.008636
592	0.000946	0.0009	0.000885	0.007187	0.006378	0.006424	0.010559	0.010513	0.010574	0.011017	0.011017	0.011078	0.010101	0.009995	0.009995	0.008652	0.008545	0.008514
593	0.000992	0.000916	0.000946	0.007019	0.006317	0.006332	0.010437	0.010468	0.010452	0.010864	0.01088	0.011032	0.01001	0.009903	0.009964	0.00856	0.008499	0.008484
594	0.001099	0.001022	0.000946	0.006851	0.006256	0.006226	0.010361	0.010361	0.010422	0.010712	0.010712	0.010757	0.009888	0.009827	0.009811	0.00853	0.008408	0.008377
595	0.000992	0.000931	0.001053	0.006729	0.006149	0.006104	0.010284	0.01033	0.01033	0.010544	0.01059	0.01062	0.009842	0.009781	0.009705	0.008392	0.008331	0.008331
596	0.001007	0.000916	0.000961	0.006699	0.006058	0.006027	0.010162	0.010223	0.010162	0.010559	0.010498	0.010605	0.009705	0.009583	0.009521	0.008301	0.008194	0.008179
597	0.000992	0.000977	0.001007	0.006699	0.006088	0.005981	0.010101	0.010086	0.010101	0.010391	0.010361	0.010468	0.009521	0.009445	0.009399	0.008163	0.00798	0.008026
598	0.000992	0.000931	0.000885	0.006607	0.005966	0.005859	0.009995	0.009964	0.009918	0.010162	0.010162	0.010239	0.009384	0.009338	0.009262	0.008026	0.007889	0.007919
599	0.000977	0.0009	0.000931	0.006561	0.005905	0.005875	0.009903	0.009857	0.009857	0.010056	0.010071	0.010132	0.009308	0.009232	0.009171	0.007935	0.007874	0.007828
600	0.000961	0.000885	0.000885	0.006454	0.005829	0.005768	0.009811	0.009781	0.009796	0.01001	0.009964	0.010056	0.009186	0.00914	0.009048	0.007797	0.007736	0.007706
